# Supplementary material for: Reduction of Nitrogen Losses in Winter Wheat Grown on Light Soils
Source: MDPI journal article supplement (doi:10.3390/agronomy11112337), 2021-11-18

Supplement:

Reduction of nitrogen losses in winter wheat grown on light soils. Agronomy

Table S1: Surveys data

(2008–2018)

| F kg/ha | Yd<br>Mg/ha | Yn<br>kg/ha | NUE<br>% | Ns<br>kg/ha | N2O_N<br>kg/ha | NH3_N<br>kg/ha | N2O_N/Yd<br>kg/Mg | NH3_N/Yd<br>kg/Mg | Ns/Yd<br>kg/Mg | Gross Margin<br>€ |
|---------|-------------|-------------|----------|-------------|----------------|----------------|-------------------|-------------------|----------------|-------------------|
| 51      | 6.5         | 154         | 304      | -105        | 1.07           | 0.67           | 0.16              | 0.10              | -16.16         | 825               |
| 51      | 6.5         | 154         | 304      | -105        | 1.07           | 0.67           | 0.16              | 0.10              | -16.16         | 825               |
| 41      | 5           | 119         | 292      | -80         | 0.85           | 0.54           | 0.17              | 0.11              | -15.94         | 587               |
| 38      | 4.5         | 107         | 284      | -71         | 0.78           | 0.50           | 0.17              | 0.11              | -15.68         | 508               |
| 51      | 6           | 142         | 280      | -93         | 1.03           | 0.67           | 0.17              | 0.11              | -15.50         | 746               |
| 61      | 7           | 166         | 273      | -107        | 1.21           | 0.80           | 0.17              | 0.11              | -15.32         | 904               |
| 51      | 5.8         | 137         | 270      | -88         | 1.02           | 0.67           | 0.18              | 0.12              | -15.17         | 714               |
| 46      | 5.2         | 123         | 269      | -79         | 0.92           | 0.60           | 0.18              | 0.12              | -15.16         | 619               |
| 41      | 4.6         | 109         | 268      | -70         | 0.82           | 0.54           | 0.18              | 0.12              | -15.14         | 524               |
| 45      | 5           | 119         | 266      | -76         | 0.89           | 0.59           | 0.18              | 0.12              | -15.16         | 587               |
| 45      | 5           | 119         | 266      | -76         | 0.89           | 0.59           | 0.18              | 0.12              | -15.16         | 587               |
| 45      | 5           | 119         | 266      | -76         | 0.89           | 0.59           | 0.18              | 0.12              | -15.16         | 587               |
| 41      | 4.5         | 107         | 263      | -68         | 0.81           | 0.54           | 0.18              | 0.12              | -15.03         | 508               |
| 41      | 4.5         | 107         | 262      | -67         | 0.81           | 0.54           | 0.18              | 0.12              | -14.96         | 508               |
| 46      | 5.0         | 119         | 259      | -74         | 0.91           | 0.60           | 0.18              | 0.12              | -14.86         | 587               |
| 51      | 5.5         | 130         | 256      | -81         | 1.00           | 0.67           | 0.18              | 0.12              | -14.72         | 667               |
| 56      | 6           | 142         | 255      | -88         | 1.09           | 0.73           | 0.18              | 0.12              | -14.69         | 746               |
| 47      | 5           | 119         | 254      | -73         | 0.92           | 0.62           | 0.18              | 0.12              | -14.67         | 587               |
| 61      | 6.5         | 154         | 254      | -95         | 1.18           | 0.80           | 0.18              | 0.12              | -14.66         | 825               |
| 38      | 4           | 95          | 252      | -59         | 0.75           | 0.50           | 0.19              | 0.12              | -14.64         | 429               |

|    |     |     |     |      |      |      |      |      |        |      |
|----|-----|-----|-----|------|------|------|------|------|--------|------|
| 38 | 4   | 95  | 252 | -59  | 0.75 | 0.50 | 0.19 | 0.12 | -14.64 | 429  |
| 38 | 4   | 95  | 252 | -59  | 0.75 | 0.50 | 0.19 | 0.12 | -14.64 | 429  |
| 68 | 7.0 | 166 | 245 | -100 | 1.29 | 0.89 | 0.18 | 0.13 | -14.34 | 904  |
| 51 | 5.2 | 123 | 243 | -74  | 0.97 | 0.67 | 0.19 | 0.13 | -14.22 | 619  |
| 51 | 5.2 | 123 | 243 | -74  | 0.97 | 0.67 | 0.19 | 0.13 | -14.22 | 619  |
| 45 | 4.5 | 107 | 239 | -64  | 0.86 | 0.59 | 0.19 | 0.13 | -14.17 | 508  |
| 45 | 4.5 | 107 | 239 | -63  | 0.86 | 0.59 | 0.19 | 0.13 | -14.09 | 508  |
| 41 | 4.1 | 97  | 238 | -58  | 0.79 | 0.54 | 0.19 | 0.13 | -14.05 | 445  |
| 81 | 8.0 | 190 | 235 | -111 | 1.51 | 1.06 | 0.19 | 0.13 | -13.93 | 1062 |
| 81 | 8.0 | 190 | 235 | -111 | 1.51 | 1.06 | 0.19 | 0.13 | -13.93 | 1062 |
| 71 | 7   | 166 | 235 | -98  | 1.32 | 0.93 | 0.19 | 0.13 | -13.94 | 904  |
| 51 | 5   | 119 | 235 | -70  | 0.96 | 0.67 | 0.19 | 0.13 | -13.99 | 587  |
| 51 | 5   | 119 | 235 | -70  | 0.96 | 0.67 | 0.19 | 0.13 | -13.99 | 587  |
| 71 | 7   | 166 | 235 | -97  | 1.32 | 0.93 | 0.19 | 0.13 | -13.92 | 904  |
| 61 | 6   | 142 | 234 | -83  | 1.14 | 0.80 | 0.19 | 0.13 | -13.91 | 746  |
| 61 | 6   | 142 | 234 | -83  | 1.14 | 0.80 | 0.19 | 0.13 | -13.87 | 746  |
| 61 | 6   | 142 | 234 | -83  | 1.14 | 0.80 | 0.19 | 0.13 | -13.87 | 746  |
| 61 | 6   | 142 | 234 | -83  | 1.14 | 0.80 | 0.19 | 0.13 | -13.87 | 746  |
| 61 | 6   | 142 | 234 | -83  | 1.14 | 0.80 | 0.19 | 0.13 | -13.87 | 746  |
| 41 | 4   | 95  | 233 | -56  | 0.78 | 0.54 | 0.19 | 0.13 | -13.90 | 429  |
| 46 | 4.5 | 107 | 233 | -62  | 0.87 | 0.60 | 0.19 | 0.13 | -13.87 | 508  |
| 41 | 4.0 | 95  | 233 | -55  | 0.78 | 0.54 | 0.19 | 0.13 | -13.85 | 429  |
| 62 | 6.0 | 142 | 230 | -82  | 1.15 | 0.81 | 0.19 | 0.14 | -13.74 | 746  |
| 79 | 7.5 | 178 | 226 | -102 | 1.45 | 1.04 | 0.19 | 0.14 | -13.54 | 983  |
| 51 | 4.8 | 114 | 225 | -65  | 0.95 | 0.67 | 0.20 | 0.14 | -13.52 | 556  |
| 75 | 7   | 166 | 222 | -94  | 1.37 | 0.98 | 0.20 | 0.14 | -13.38 | 904  |
| 86 | 8.0 | 190 | 221 | -107 | 1.56 | 1.13 | 0.20 | 0.14 | -13.32 | 1062 |

|    |     |     |     |      |      |      |      |      |        |      |
|----|-----|-----|-----|------|------|------|------|------|--------|------|
| 49 | 4.5 | 107 | 220 | -60  | 0.90 | 0.64 | 0.20 | 0.14 | -13.30 | 508  |
| 71 | 6.5 | 154 | 218 | -86  | 1.29 | 0.93 | 0.20 | 0.14 | -13.16 | 825  |
| 71 | 6.5 | 154 | 218 | -86  | 1.29 | 0.93 | 0.20 | 0.14 | -13.16 | 825  |
| 61 | 5.5 | 130 | 214 | -71  | 1.11 | 0.80 | 0.20 | 0.15 | -12.95 | 667  |
| 56 | 5   | 119 | 214 | -65  | 1.02 | 0.73 | 0.20 | 0.15 | -13.01 | 587  |
| 56 | 5   | 119 | 214 | -65  | 1.02 | 0.73 | 0.20 | 0.15 | -13.01 | 587  |
| 45 | 4   | 95  | 213 | -52  | 0.82 | 0.59 | 0.21 | 0.15 | -12.93 | 429  |
| 45 | 4   | 95  | 213 | -52  | 0.82 | 0.59 | 0.21 | 0.15 | -12.93 | 429  |
| 45 | 4   | 95  | 213 | -52  | 0.82 | 0.59 | 0.21 | 0.15 | -12.93 | 429  |
| 51 | 4.5 | 107 | 211 | -58  | 0.92 | 0.67 | 0.21 | 0.15 | -12.86 | 508  |
| 51 | 4.5 | 107 | 210 | -58  | 0.92 | 0.67 | 0.21 | 0.15 | -12.79 | 508  |
| 51 | 4.5 | 107 | 210 | -58  | 0.92 | 0.67 | 0.21 | 0.15 | -12.79 | 508  |
| 57 | 5   | 119 | 210 | -64  | 1.03 | 0.75 | 0.21 | 0.15 | -12.81 | 587  |
| 57 | 5   | 119 | 210 | -64  | 1.03 | 0.75 | 0.21 | 0.15 | -12.81 | 587  |
| 57 | 5   | 119 | 210 | -64  | 1.03 | 0.75 | 0.21 | 0.15 | -12.81 | 587  |
| 91 | 8   | 190 | 209 | -102 | 1.62 | 1.20 | 0.20 | 0.15 | -12.76 | 1062 |
| 91 | 8   | 190 | 209 | -102 | 1.62 | 1.20 | 0.20 | 0.15 | -12.71 | 1062 |
| 91 | 8.0 | 190 | 209 | -102 | 1.62 | 1.20 | 0.20 | 0.15 | -12.71 | 1062 |
| 57 | 5   | 119 | 209 | -64  | 1.03 | 0.75 | 0.21 | 0.15 | -12.71 | 587  |
| 71 | 6.2 | 147 | 208 | -78  | 1.27 | 0.93 | 0.20 | 0.15 | -12.66 | 777  |
| 46 | 4   | 95  | 208 | -51  | 0.83 | 0.60 | 0.21 | 0.15 | -12.68 | 429  |
| 75 | 6.5 | 154 | 206 | -82  | 1.33 | 0.98 | 0.20 | 0.15 | -12.56 | 825  |
| 81 | 7   | 166 | 206 | -88  | 1.43 | 1.06 | 0.20 | 0.15 | -12.54 | 904  |
| 81 | 7   | 166 | 206 | -88  | 1.43 | 1.06 | 0.20 | 0.15 | -12.54 | 904  |
| 81 | 7   | 166 | 206 | -88  | 1.43 | 1.06 | 0.20 | 0.15 | -12.54 | 904  |
| 81 | 7   | 166 | 206 | -88  | 1.43 | 1.06 | 0.20 | 0.15 | -12.54 | 904  |
| 81 | 7   | 166 | 206 | -88  | 1.43 | 1.06 | 0.20 | 0.15 | -12.54 | 904  |

|     |     |     |     |      |      |      |      |      |        |      |
|-----|-----|-----|-----|------|------|------|------|------|--------|------|
| 81  | 7   | 166 | 206 | -88  | 1.43 | 1.06 | 0.20 | 0.15 | -12.54 | 904  |
| 81  | 7   | 166 | 206 | -88  | 1.43 | 1.06 | 0.20 | 0.15 | -12.53 | 904  |
| 81  | 7   | 166 | 206 | -88  | 1.43 | 1.06 | 0.20 | 0.15 | -12.53 | 904  |
| 81  | 7.0 | 166 | 206 | -88  | 1.43 | 1.06 | 0.20 | 0.15 | -12.53 | 904  |
| 76  | 6.5 | 154 | 204 | -81  | 1.34 | 1.00 | 0.21 | 0.15 | -12.41 | 825  |
| 76  | 6.5 | 154 | 203 | -81  | 1.34 | 1.00 | 0.21 | 0.15 | -12.41 | 825  |
| 71  | 6.0 | 142 | 201 | -74  | 1.25 | 0.93 | 0.21 | 0.16 | -12.28 | 746  |
| 71  | 6   | 142 | 201 | -73  | 1.25 | 0.93 | 0.21 | 0.16 | -12.25 | 746  |
| 71  | 6   | 142 | 201 | -73  | 1.25 | 0.93 | 0.21 | 0.16 | -12.25 | 746  |
| 72  | 6   | 142 | 198 | -73  | 1.26 | 0.94 | 0.21 | 0.16 | -12.12 | 746  |
| 51  | 4.2 | 100 | 197 | -51  | 0.90 | 0.67 | 0.21 | 0.16 | -12.11 | 461  |
| 91  | 7.5 | 178 | 196 | -90  | 1.58 | 1.20 | 0.21 | 0.16 | -12.01 | 983  |
| 91  | 7.5 | 178 | 196 | -90  | 1.58 | 1.20 | 0.21 | 0.16 | -12.01 | 983  |
| 61  | 5   | 119 | 196 | -60  | 1.07 | 0.80 | 0.21 | 0.16 | -12.03 | 587  |
| 61  | 5   | 119 | 196 | -60  | 1.07 | 0.80 | 0.21 | 0.16 | -12.03 | 587  |
| 61  | 5   | 119 | 196 | -60  | 1.07 | 0.80 | 0.21 | 0.16 | -12.03 | 587  |
| 61  | 5   | 119 | 196 | -60  | 1.07 | 0.80 | 0.21 | 0.16 | -12.03 | 587  |
| 61  | 5   | 119 | 196 | -60  | 1.07 | 0.80 | 0.21 | 0.16 | -12.03 | 587  |
| 79  | 6.5 | 154 | 196 | -78  | 1.38 | 1.04 | 0.21 | 0.16 | -11.96 | 825  |
| 79  | 6.5 | 154 | 196 | -78  | 1.38 | 1.04 | 0.21 | 0.16 | -11.96 | 825  |
| 61  | 5.0 | 119 | 195 | -60  | 1.07 | 0.80 | 0.21 | 0.16 | -11.93 | 587  |
| 67  | 5.5 | 130 | 195 | -65  | 1.17 | 0.88 | 0.21 | 0.16 | -11.88 | 667  |
| 67  | 5.5 | 130 | 195 | -65  | 1.17 | 0.88 | 0.21 | 0.16 | -11.88 | 667  |
| 71  | 5.8 | 137 | 194 | -68  | 1.24 | 0.93 | 0.21 | 0.16 | -11.81 | 714  |
| 86  | 7   | 166 | 194 | -83  | 1.49 | 1.13 | 0.21 | 0.16 | -11.85 | 904  |
| 111 | 9   | 213 | 193 | -106 | 1.91 | 1.46 | 0.21 | 0.16 | -11.77 | 1221 |
| 111 | 9   | 213 | 193 | -106 | 1.91 | 1.46 | 0.21 | 0.16 | -11.77 | 1221 |

|     |     |     |     |      |      |      |      |      |        |      |
|-----|-----|-----|-----|------|------|------|------|------|--------|------|
| 56  | 4.5 | 107 | 191 | -53  | 0.98 | 0.73 | 0.22 | 0.16 | -11.70 | 508  |
| 81  | 6.5 | 154 | 191 | -76  | 1.40 | 1.06 | 0.22 | 0.16 | -11.66 | 825  |
| 81  | 6.5 | 154 | 191 | -76  | 1.40 | 1.06 | 0.22 | 0.16 | -11.66 | 825  |
| 106 | 8.5 | 201 | 191 | -99  | 1.82 | 1.39 | 0.21 | 0.16 | -11.64 | 1142 |
| 75  | 6.0 | 142 | 190 | -70  | 1.30 | 0.98 | 0.22 | 0.16 | -11.63 | 746  |
| 63  | 5   | 119 | 190 | -58  | 1.09 | 0.83 | 0.22 | 0.17 | -11.64 | 587  |
| 113 | 9   | 213 | 189 | -104 | 1.93 | 1.48 | 0.21 | 0.16 | -11.56 | 1221 |
| 69  | 5.5 | 130 | 189 | -63  | 1.19 | 0.91 | 0.22 | 0.16 | -11.53 | 667  |
| 57  | 4.5 | 107 | 189 | -52  | 0.99 | 0.75 | 0.22 | 0.17 | -11.56 | 508  |
| 101 | 8   | 190 | 189 | -92  | 1.73 | 1.33 | 0.22 | 0.17 | -11.54 | 1062 |
| 38  | 3   | 71  | 188 | -34  | 0.67 | 0.50 | 0.22 | 0.17 | -11.49 | 271  |
| 101 | 8   | 190 | 188 | -92  | 1.73 | 1.33 | 0.22 | 0.17 | -11.49 | 1062 |
| 91  | 7.2 | 171 | 188 | -83  | 1.56 | 1.20 | 0.22 | 0.17 | -11.49 | 936  |
| 61  | 4.8 | 114 | 188 | -55  | 1.06 | 0.80 | 0.22 | 0.17 | -11.49 | 556  |
| 71  | 5.6 | 133 | 188 | -64  | 1.22 | 0.93 | 0.22 | 0.17 | -11.46 | 682  |
| 51  | 4   | 95  | 187 | -46  | 0.89 | 0.67 | 0.22 | 0.17 | -11.46 | 429  |
| 51  | 4   | 95  | 187 | -46  | 0.89 | 0.67 | 0.22 | 0.17 | -11.41 | 429  |
| 51  | 4.0 | 95  | 187 | -46  | 0.89 | 0.67 | 0.22 | 0.17 | -11.41 | 429  |
| 51  | 4.0 | 95  | 187 | -46  | 0.89 | 0.67 | 0.22 | 0.17 | -11.41 | 429  |
| 51  | 4.0 | 95  | 187 | -46  | 0.89 | 0.67 | 0.22 | 0.17 | -11.41 | 429  |
| 90  | 7   | 166 | 185 | -79  | 1.53 | 1.18 | 0.22 | 0.17 | -11.29 | 904  |
| 71  | 5.5 | 130 | 184 | -62  | 1.22 | 0.93 | 0.22 | 0.17 | -11.24 | 667  |
| 71  | 5.5 | 130 | 184 | -61  | 1.22 | 0.93 | 0.22 | 0.17 | -11.17 | 667  |
| 71  | 5.5 | 130 | 184 | -61  | 1.22 | 0.93 | 0.22 | 0.17 | -11.17 | 667  |
| 71  | 5.5 | 130 | 184 | -61  | 1.22 | 0.93 | 0.22 | 0.17 | -11.17 | 667  |
| 71  | 5.5 | 130 | 184 | -61  | 1.22 | 0.93 | 0.22 | 0.17 | -11.17 | 667  |
| 71  | 5.5 | 130 | 184 | -61  | 1.22 | 0.93 | 0.22 | 0.17 | -11.17 | 667  |

|     |     |     |     |      |      |      |      |      |        |      |
|-----|-----|-----|-----|------|------|------|------|------|--------|------|
| 91  | 7   | 166 | 183 | -78  | 1.54 | 1.20 | 0.22 | 0.17 | -11.15 | 904  |
| 91  | 7   | 166 | 183 | -78  | 1.54 | 1.20 | 0.22 | 0.17 | -11.15 | 904  |
| 91  | 7   | 166 | 183 | -78  | 1.54 | 1.20 | 0.22 | 0.17 | -11.13 | 904  |
| 91  | 7   | 166 | 183 | -78  | 1.54 | 1.20 | 0.22 | 0.17 | -11.13 | 904  |
| 91  | 7   | 166 | 183 | -78  | 1.54 | 1.20 | 0.22 | 0.17 | -11.13 | 904  |
| 91  | 7   | 166 | 183 | -78  | 1.54 | 1.20 | 0.22 | 0.17 | -11.13 | 904  |
| 91  | 7.0 | 166 | 183 | -78  | 1.54 | 1.20 | 0.22 | 0.17 | -11.13 | 904  |
| 91  | 7.0 | 166 | 183 | -78  | 1.54 | 1.20 | 0.22 | 0.17 | -11.13 | 904  |
| 91  | 7.0 | 166 | 183 | -78  | 1.54 | 1.20 | 0.22 | 0.17 | -11.13 | 904  |
| 61  | 4.7 | 111 | 183 | -52  | 1.05 | 0.80 | 0.22 | 0.17 | -11.10 | 540  |
| 121 | 9.3 | 220 | 183 | -103 | 2.04 | 1.59 | 0.22 | 0.17 | -11.11 | 1268 |
| 111 | 8.5 | 201 | 182 | -94  | 1.87 | 1.46 | 0.22 | 0.17 | -11.07 | 1142 |
| 59  | 4.5 | 107 | 182 | -50  | 1.01 | 0.77 | 0.22 | 0.17 | -11.05 | 508  |
| 66  | 5   | 119 | 181 | -55  | 1.13 | 0.87 | 0.23 | 0.17 | -11.06 | 587  |
| 79  | 6   | 142 | 181 | -66  | 1.34 | 1.04 | 0.22 | 0.17 | -10.98 | 746  |
| 79  | 6   | 142 | 181 | -66  | 1.34 | 1.04 | 0.22 | 0.17 | -10.98 | 746  |
| 79  | 6.0 | 142 | 181 | -66  | 1.34 | 1.04 | 0.22 | 0.17 | -10.98 | 746  |
| 79  | 6.0 | 142 | 181 | -66  | 1.34 | 1.04 | 0.22 | 0.17 | -10.98 | 746  |
| 79  | 6.0 | 142 | 181 | -66  | 1.34 | 1.04 | 0.22 | 0.17 | -10.98 | 746  |
| 79  | 6.0 | 142 | 181 | -66  | 1.34 | 1.04 | 0.22 | 0.17 | -10.98 | 746  |
| 79  | 6   | 142 | 180 | -66  | 1.34 | 1.04 | 0.22 | 0.17 | -10.95 | 746  |
| 79  | 6   | 142 | 180 | -66  | 1.34 | 1.04 | 0.22 | 0.17 | -10.95 | 746  |
| 79  | 6   | 142 | 180 | -66  | 1.34 | 1.04 | 0.22 | 0.17 | -10.95 | 746  |
| 86  | 6.5 | 154 | 180 | -71  | 1.45 | 1.13 | 0.22 | 0.17 | -10.91 | 825  |
| 86  | 6.5 | 154 | 180 | -71  | 1.45 | 1.13 | 0.22 | 0.17 | -10.91 | 825  |
| 61  | 4.6 | 109 | 180 | -50  | 1.04 | 0.80 | 0.23 | 0.17 | -10.90 | 524  |
| 80  | 6   | 142 | 178 | -65  | 1.35 | 1.05 | 0.23 | 0.18 | -10.78 | 746  |

|     |     |     |     |     |      |      |      |      |        |      |
|-----|-----|-----|-----|-----|------|------|------|------|--------|------|
| 107 | 8.0 | 190 | 178 | -86 | 1.79 | 1.41 | 0.22 | 0.18 | -10.76 | 1062 |
| 67  | 5.0 | 119 | 178 | -54 | 1.14 | 0.88 | 0.23 | 0.18 | -10.76 | 587  |
| 51  | 3.8 | 90  | 178 | -41 | 0.87 | 0.67 | 0.23 | 0.18 | -10.75 | 397  |
| 121 | 9   | 213 | 177 | -96 | 2.02 | 1.59 | 0.22 | 0.18 | -10.69 | 1221 |
| 101 | 7.5 | 178 | 177 | -80 | 1.69 | 1.33 | 0.23 | 0.18 | -10.68 | 983  |
| 61  | 4.5 | 107 | 176 | -48 | 1.03 | 0.80 | 0.23 | 0.18 | -10.70 | 508  |
| 61  | 4.5 | 107 | 176 | -48 | 1.03 | 0.80 | 0.23 | 0.18 | -10.70 | 508  |
| 81  | 6   | 142 | 176 | -64 | 1.36 | 1.06 | 0.23 | 0.18 | -10.65 | 746  |
| 81  | 6   | 142 | 176 | -64 | 1.36 | 1.06 | 0.23 | 0.18 | -10.65 | 746  |
| 81  | 6   | 142 | 176 | -64 | 1.36 | 1.06 | 0.23 | 0.18 | -10.65 | 746  |
| 81  | 6.0 | 142 | 176 | -64 | 1.36 | 1.06 | 0.23 | 0.18 | -10.65 | 746  |
| 81  | 6.0 | 142 | 176 | -64 | 1.36 | 1.06 | 0.23 | 0.18 | -10.65 | 746  |
| 81  | 6   | 142 | 176 | -64 | 1.36 | 1.06 | 0.23 | 0.18 | -10.62 | 746  |
| 81  | 6   | 142 | 176 | -64 | 1.36 | 1.06 | 0.23 | 0.18 | -10.62 | 746  |
| 81  | 6   | 142 | 176 | -64 | 1.36 | 1.06 | 0.23 | 0.18 | -10.62 | 746  |
| 81  | 6   | 142 | 176 | -64 | 1.36 | 1.06 | 0.23 | 0.18 | -10.62 | 746  |
| 81  | 6   | 142 | 176 | -64 | 1.36 | 1.06 | 0.23 | 0.18 | -10.62 | 746  |
| 81  | 6   | 142 | 176 | -64 | 1.36 | 1.06 | 0.23 | 0.18 | -10.62 | 746  |
| 81  | 6   | 142 | 176 | -64 | 1.36 | 1.06 | 0.23 | 0.18 | -10.62 | 746  |
| 81  | 6   | 142 | 176 | -64 | 1.36 | 1.06 | 0.23 | 0.18 | -10.62 | 746  |
| 81  | 6   | 142 | 176 | -64 | 1.36 | 1.06 | 0.23 | 0.18 | -10.62 | 746  |
| 81  | 6   | 142 | 176 | -64 | 1.36 | 1.06 | 0.23 | 0.18 | -10.62 | 746  |
| 61  | 4.5 | 107 | 176 | -48 | 1.03 | 0.80 | 0.23 | 0.18 | -10.62 | 508  |
| 61  | 4.5 | 107 | 176 | -48 | 1.03 | 0.80 | 0.23 | 0.18 | -10.62 | 508  |
| 61  | 4.5 | 107 | 176 | -48 | 1.03 | 0.80 | 0.23 | 0.18 | -10.62 | 508  |
| 41  | 3   | 71  | 175 | -32 | 0.71 | 0.54 | 0.24 | 0.18 | -10.55 | 271  |
| 71  | 5.2 | 123 | 174 | -55 | 1.19 | 0.93 | 0.23 | 0.18 | -10.51 | 619  |
| 101 | 7.4 | 175 | 174 | -78 | 1.68 | 1.33 | 0.23 | 0.18 | -10.50 | 967  |

|     |     |     |     |     |      |      |      |      |        |      |
|-----|-----|-----|-----|-----|------|------|------|------|--------|------|
| 71  | 5.2 | 123 | 174 | -54 | 1.19 | 0.93 | 0.23 | 0.18 | -10.47 | 619  |
| 51  | 3.7 | 88  | 174 | -39 | 0.87 | 0.67 | 0.23 | 0.18 | -10.50 | 382  |
| 66  | 4.8 | 114 | 174 | -50 | 1.11 | 0.87 | 0.23 | 0.18 | -10.47 | 556  |
| 62  | 4.5 | 107 | 173 | -47 | 1.05 | 0.81 | 0.23 | 0.18 | -10.48 | 508  |
| 69  | 5.0 | 119 | 172 | -52 | 1.16 | 0.91 | 0.23 | 0.18 | -10.37 | 587  |
| 83  | 6.0 | 142 | 172 | -62 | 1.38 | 1.09 | 0.23 | 0.18 | -10.33 | 746  |
| 83  | 6   | 142 | 172 | -62 | 1.38 | 1.09 | 0.23 | 0.18 | -10.30 | 746  |
| 111 | 8   | 190 | 172 | -83 | 1.84 | 1.46 | 0.23 | 0.18 | -10.32 | 1062 |
| 97  | 7   | 166 | 172 | -72 | 1.61 | 1.27 | 0.23 | 0.18 | -10.30 | 904  |
| 61  | 4.4 | 104 | 171 | -45 | 1.03 | 0.80 | 0.23 | 0.18 | -10.26 | 492  |
| 111 | 8   | 190 | 171 | -82 | 1.84 | 1.46 | 0.23 | 0.18 | -10.27 | 1062 |
| 111 | 8   | 190 | 171 | -82 | 1.84 | 1.46 | 0.23 | 0.18 | -10.27 | 1062 |
| 111 | 8   | 190 | 171 | -82 | 1.84 | 1.46 | 0.23 | 0.18 | -10.27 | 1062 |
| 111 | 8   | 190 | 171 | -82 | 1.84 | 1.46 | 0.23 | 0.18 | -10.27 | 1062 |
| 111 | 8.0 | 190 | 171 | -82 | 1.84 | 1.46 | 0.23 | 0.18 | -10.27 | 1062 |
| 111 | 8.0 | 190 | 171 | -82 | 1.84 | 1.46 | 0.23 | 0.18 | -10.27 | 1062 |
| 111 | 8.0 | 190 | 171 | -82 | 1.84 | 1.46 | 0.23 | 0.18 | -10.27 | 1062 |
| 111 | 8.0 | 190 | 171 | -82 | 1.84 | 1.46 | 0.23 | 0.18 | -10.27 | 1062 |
| 63  | 4.5 | 107 | 171 | -46 | 1.06 | 0.83 | 0.23 | 0.18 | -10.26 | 508  |
| 63  | 4.5 | 107 | 171 | -46 | 1.06 | 0.83 | 0.23 | 0.18 | -10.26 | 508  |
| 91  | 6.5 | 154 | 170 | -66 | 1.51 | 1.20 | 0.23 | 0.18 | -10.16 | 825  |
| 91  | 6.5 | 154 | 170 | -66 | 1.51 | 1.20 | 0.23 | 0.18 | -10.16 | 825  |
| 91  | 6.5 | 154 | 170 | -66 | 1.51 | 1.20 | 0.23 | 0.18 | -10.15 | 825  |
| 91  | 6.5 | 154 | 170 | -66 | 1.51 | 1.20 | 0.23 | 0.18 | -10.15 | 825  |
| 91  | 6.5 | 154 | 170 | -66 | 1.51 | 1.20 | 0.23 | 0.18 | -10.15 | 825  |
| 91  | 6.5 | 154 | 170 | -66 | 1.51 | 1.20 | 0.23 | 0.18 | -10.15 | 825  |
| 71  | 5   | 119 | 168 | -50 | 1.18 | 0.93 | 0.24 | 0.19 | -10.08 | 587  |



|     |     |     |     |     |      |      |      |      |        |      |
|-----|-----|-----|-----|-----|------|------|------|------|--------|------|
| 71  | 5   | 119 | 168 | -50 | 1.18 | 0.93 | 0.24 | 0.19 | -10.08 | 587  |
| 71  | 5   | 119 | 168 | -50 | 1.18 | 0.93 | 0.24 | 0.19 | -10.08 | 587  |
| 71  | 5   | 119 | 168 | -50 | 1.18 | 0.93 | 0.24 | 0.19 | -10.08 | 587  |
| 71  | 5   | 119 | 168 | -50 | 1.18 | 0.93 | 0.24 | 0.19 | -10.08 | 587  |
| 71  | 5   | 119 | 168 | -50 | 1.18 | 0.93 | 0.24 | 0.19 | -10.08 | 587  |
| 71  | 5   | 119 | 168 | -50 | 1.18 | 0.93 | 0.24 | 0.19 | -10.08 | 587  |
| 113 | 8   | 190 | 168 | -80 | 1.86 | 1.48 | 0.23 | 0.19 | -10.03 | 1062 |
| 106 | 7.5 | 178 | 168 | -75 | 1.75 | 1.39 | 0.23 | 0.19 | -10.03 | 983  |
| 61  | 4.3 | 102 | 168 | -43 | 1.02 | 0.80 | 0.24 | 0.19 | -10.03 | 477  |
| 61  | 4.3 | 102 | 168 | -43 | 1.02 | 0.80 | 0.24 | 0.19 | -10.03 | 477  |
| 71  | 5   | 119 | 168 | -50 | 1.18 | 0.93 | 0.24 | 0.19 | -9.98  | 587  |
| 71  | 5   | 119 | 168 | -50 | 1.18 | 0.93 | 0.24 | 0.19 | -9.98  | 587  |
| 71  | 5   | 119 | 168 | -50 | 1.18 | 0.93 | 0.24 | 0.19 | -9.98  | 587  |
| 71  | 5   | 119 | 168 | -50 | 1.18 | 0.93 | 0.24 | 0.19 | -9.98  | 587  |
| 71  | 5   | 119 | 168 | -50 | 1.18 | 0.93 | 0.24 | 0.19 | -9.98  | 587  |
| 71  | 5   | 119 | 168 | -50 | 1.18 | 0.93 | 0.24 | 0.19 | -9.98  | 587  |
| 71  | 5   | 119 | 168 | -50 | 1.18 | 0.93 | 0.24 | 0.19 | -9.98  | 587  |
| 71  | 5   | 119 | 168 | -50 | 1.18 | 0.93 | 0.24 | 0.19 | -9.98  | 587  |
| 71  | 5.0 | 119 | 168 | -50 | 1.18 | 0.93 | 0.24 | 0.19 | -9.98  | 587  |
| 71  | 5.0 | 119 | 168 | -50 | 1.18 | 0.93 | 0.24 | 0.19 | -9.98  | 587  |
| 71  | 5.0 | 119 | 168 | -50 | 1.18 | 0.93 | 0.24 | 0.19 | -9.98  | 587  |
| 57  | 4   | 95  | 168 | -40 | 0.95 | 0.75 | 0.24 | 0.19 | -10.00 | 429  |
| 57  | 4   | 95  | 168 | -40 | 0.95 | 0.75 | 0.24 | 0.19 | -10.00 | 429  |
| 57  | 4   | 95  | 168 | -40 | 0.95 | 0.75 | 0.24 | 0.19 | -10.00 | 429  |
| 105 | 7.4 | 175 | 168 | -74 | 1.73 | 1.38 | 0.23 | 0.19 | -9.97  | 967  |
| 57  | 4   | 95  | 167 | -40 | 0.95 | 0.75 | 0.24 | 0.19 | -9.95  | 429  |
| 57  | 4   | 95  | 167 | -40 | 0.95 | 0.75 | 0.24 | 0.19 | -9.95  | 429  |

|     |     |     |     |     |      |      |      |      |       |      |
|-----|-----|-----|-----|-----|------|------|------|------|-------|------|
| 57  | 4   | 95  | 167 | -40 | 0.95 | 0.75 | 0.24 | 0.19 | -9.95 | 429  |
| 57  | 4   | 95  | 167 | -40 | 0.95 | 0.75 | 0.24 | 0.19 | -9.95 | 429  |
| 107 | 7.5 | 178 | 167 | -74 | 1.76 | 1.41 | 0.23 | 0.19 | -9.89 | 983  |
| 86  | 6   | 142 | 166 | -59 | 1.42 | 1.13 | 0.24 | 0.19 | -9.84 | 746  |
| 86  | 6.0 | 142 | 166 | -59 | 1.42 | 1.13 | 0.24 | 0.19 | -9.84 | 746  |
| 86  | 6   | 142 | 166 | -59 | 1.42 | 1.13 | 0.24 | 0.19 | -9.81 | 746  |
| 101 | 7   | 166 | 165 | -68 | 1.65 | 1.33 | 0.24 | 0.19 | -9.75 | 904  |
| 101 | 7   | 166 | 165 | -68 | 1.65 | 1.33 | 0.24 | 0.19 | -9.75 | 904  |
| 101 | 7   | 166 | 165 | -68 | 1.65 | 1.33 | 0.24 | 0.19 | -9.75 | 904  |
| 101 | 7   | 166 | 165 | -68 | 1.65 | 1.33 | 0.24 | 0.19 | -9.75 | 904  |
| 101 | 7   | 166 | 165 | -68 | 1.65 | 1.33 | 0.24 | 0.19 | -9.74 | 904  |
| 101 | 7   | 166 | 165 | -68 | 1.65 | 1.33 | 0.24 | 0.19 | -9.74 | 904  |
| 101 | 7.0 | 166 | 165 | -68 | 1.65 | 1.33 | 0.24 | 0.19 | -9.74 | 904  |
| 101 | 7.0 | 166 | 165 | -68 | 1.65 | 1.33 | 0.24 | 0.19 | -9.74 | 904  |
| 61  | 4.2 | 100 | 165 | -41 | 1.01 | 0.80 | 0.24 | 0.19 | -9.79 | 461  |
| 51  | 3.5 | 83  | 164 | -34 | 0.85 | 0.67 | 0.24 | 0.19 | -9.66 | 350  |
| 51  | 3.5 | 83  | 164 | -34 | 0.85 | 0.67 | 0.24 | 0.19 | -9.66 | 350  |
| 51  | 3.5 | 83  | 164 | -34 | 0.85 | 0.67 | 0.24 | 0.19 | -9.66 | 350  |
| 51  | 3.5 | 83  | 164 | -34 | 0.85 | 0.67 | 0.24 | 0.19 | -9.65 | 350  |
| 51  | 3.5 | 83  | 164 | -34 | 0.85 | 0.67 | 0.24 | 0.19 | -9.65 | 350  |
| 131 | 9   | 213 | 163 | -86 | 2.13 | 1.72 | 0.24 | 0.19 | -9.61 | 1221 |
| 66  | 4.5 | 107 | 163 | -43 | 1.09 | 0.87 | 0.24 | 0.19 | -9.61 | 508  |
| 66  | 4.5 | 107 | 163 | -43 | 1.09 | 0.87 | 0.24 | 0.19 | -9.61 | 508  |
| 66  | 4.5 | 107 | 163 | -43 | 1.09 | 0.87 | 0.24 | 0.19 | -9.61 | 508  |
| 66  | 4.5 | 107 | 163 | -43 | 1.09 | 0.87 | 0.24 | 0.19 | -9.61 | 508  |
| 66  | 4.5 | 107 | 163 | -43 | 1.09 | 0.87 | 0.24 | 0.19 | -9.61 | 508  |
| 76  | 5.2 | 123 | 162 | -50 | 1.25 | 1.00 | 0.24 | 0.19 | -9.53 | 619  |

|     |     |     |     |     |      |      |      |      |       |      |
|-----|-----|-----|-----|-----|------|------|------|------|-------|------|
| 91  | 6.2 | 147 | 162 | -59 | 1.49 | 1.20 | 0.24 | 0.19 | -9.51 | 777  |
| 103 | 7.0 | 166 | 162 | -66 | 1.68 | 1.35 | 0.24 | 0.19 | -9.46 | 904  |
| 81  | 5.5 | 130 | 162 | -52 | 1.33 | 1.06 | 0.24 | 0.19 | -9.46 | 667  |
| 81  | 5.5 | 130 | 162 | -52 | 1.33 | 1.06 | 0.24 | 0.19 | -9.46 | 667  |
| 81  | 5.5 | 130 | 162 | -52 | 1.33 | 1.06 | 0.24 | 0.19 | -9.46 | 667  |
| 81  | 5.5 | 130 | 162 | -52 | 1.33 | 1.06 | 0.24 | 0.19 | -9.46 | 667  |
| 59  | 4   | 95  | 161 | -38 | 0.98 | 0.77 | 0.24 | 0.19 | -9.46 | 429  |
| 71  | 4.8 | 114 | 161 | -45 | 1.17 | 0.93 | 0.24 | 0.19 | -9.46 | 556  |
| 81  | 5.5 | 130 | 161 | -52 | 1.33 | 1.06 | 0.24 | 0.19 | -9.40 | 667  |
| 81  | 5.5 | 130 | 161 | -52 | 1.33 | 1.06 | 0.24 | 0.19 | -9.40 | 667  |
| 81  | 5.5 | 130 | 161 | -52 | 1.33 | 1.06 | 0.24 | 0.19 | -9.40 | 667  |
| 121 | 8.2 | 194 | 161 | -77 | 1.96 | 1.59 | 0.24 | 0.19 | -9.41 | 1094 |
| 71  | 4.8 | 114 | 161 | -45 | 1.17 | 0.93 | 0.24 | 0.19 | -9.41 | 556  |
| 71  | 4.8 | 114 | 161 | -45 | 1.17 | 0.93 | 0.24 | 0.19 | -9.41 | 556  |
| 71  | 4.8 | 114 | 161 | -45 | 1.17 | 0.93 | 0.24 | 0.19 | -9.41 | 556  |
| 111 | 7.5 | 178 | 161 | -71 | 1.80 | 1.46 | 0.24 | 0.19 | -9.41 | 983  |
| 111 | 7.5 | 178 | 161 | -71 | 1.80 | 1.46 | 0.24 | 0.19 | -9.41 | 983  |
| 111 | 7.5 | 178 | 161 | -70 | 1.80 | 1.46 | 0.24 | 0.19 | -9.37 | 983  |
| 111 | 7.5 | 178 | 161 | -70 | 1.80 | 1.46 | 0.24 | 0.19 | -9.37 | 983  |
| 111 | 7.5 | 178 | 161 | -70 | 1.80 | 1.46 | 0.24 | 0.19 | -9.37 | 983  |
| 126 | 8.5 | 201 | 160 | -79 | 2.04 | 1.66 | 0.24 | 0.19 | -9.35 | 1142 |
| 75  | 5   | 119 | 159 | -47 | 1.22 | 0.98 | 0.24 | 0.20 | -9.30 | 587  |
| 90  | 6   | 142 | 159 | -55 | 1.46 | 1.18 | 0.24 | 0.20 | -9.19 | 746  |
| 66  | 4.4 | 104 | 158 | -40 | 1.08 | 0.87 | 0.25 | 0.20 | -9.15 | 492  |
| 101 | 6.7 | 159 | 158 | -61 | 1.63 | 1.33 | 0.24 | 0.20 | -9.14 | 857  |
| 113 | 7.5 | 178 | 158 | -68 | 1.82 | 1.48 | 0.24 | 0.20 | -9.11 | 983  |
| 113 | 7.5 | 178 | 158 | -68 | 1.82 | 1.48 | 0.24 | 0.20 | -9.11 | 983  |

|     |     |     |     |     |      |      |      |      |       |      |
|-----|-----|-----|-----|-----|------|------|------|------|-------|------|
| 121 | 8   | 190 | 157 | -73 | 1.95 | 1.59 | 0.24 | 0.20 | -9.10 | 1062 |
| 121 | 8   | 190 | 157 | -72 | 1.95 | 1.59 | 0.24 | 0.20 | -9.05 | 1062 |
| 121 | 8   | 190 | 157 | -72 | 1.95 | 1.59 | 0.24 | 0.20 | -9.05 | 1062 |
| 121 | 8.0 | 190 | 157 | -72 | 1.95 | 1.59 | 0.24 | 0.20 | -9.05 | 1062 |
| 121 | 8.0 | 190 | 157 | -72 | 1.95 | 1.59 | 0.24 | 0.20 | -9.05 | 1062 |
| 121 | 8.0 | 190 | 157 | -72 | 1.95 | 1.59 | 0.24 | 0.20 | -9.05 | 1062 |
| 91  | 6   | 142 | 157 | -54 | 1.47 | 1.20 | 0.25 | 0.20 | -9.03 | 746  |
| 91  | 6   | 142 | 157 | -54 | 1.47 | 1.20 | 0.25 | 0.20 | -9.03 | 746  |
| 91  | 6   | 142 | 157 | -54 | 1.47 | 1.20 | 0.25 | 0.20 | -9.03 | 746  |
| 91  | 6   | 142 | 157 | -54 | 1.47 | 1.20 | 0.25 | 0.20 | -9.03 | 746  |
| 91  | 6   | 142 | 157 | -54 | 1.47 | 1.20 | 0.25 | 0.20 | -9.03 | 746  |
| 91  | 6   | 142 | 157 | -54 | 1.47 | 1.20 | 0.25 | 0.20 | -9.03 | 746  |
| 91  | 6   | 142 | 157 | -54 | 1.47 | 1.20 | 0.25 | 0.20 | -9.03 | 746  |
| 91  | 6   | 142 | 157 | -54 | 1.47 | 1.20 | 0.25 | 0.20 | -9.03 | 746  |
| 91  | 6   | 142 | 157 | -54 | 1.47 | 1.20 | 0.25 | 0.20 | -9.03 | 746  |
| 91  | 6.0 | 142 | 157 | -54 | 1.47 | 1.20 | 0.25 | 0.20 | -9.03 | 746  |
| 91  | 6.0 | 142 | 157 | -54 | 1.47 | 1.20 | 0.25 | 0.20 | -9.03 | 746  |
| 91  | 6   | 142 | 157 | -54 | 1.47 | 1.20 | 0.25 | 0.20 | -8.99 | 746  |
| 91  | 6   | 142 | 157 | -54 | 1.47 | 1.20 | 0.25 | 0.20 | -8.99 | 746  |
| 91  | 6   | 142 | 157 | -54 | 1.47 | 1.20 | 0.25 | 0.20 | -8.99 | 746  |
| 91  | 6   | 142 | 157 | -54 | 1.47 | 1.20 | 0.25 | 0.20 | -8.99 | 746  |
| 91  | 6   | 142 | 157 | -54 | 1.47 | 1.20 | 0.25 | 0.20 | -8.99 | 746  |
| 61  | 4   | 95  | 157 | -36 | 1.00 | 0.80 | 0.25 | 0.20 | -9.02 | 429  |
| 61  | 4   | 95  | 157 | -36 | 1.00 | 0.80 | 0.25 | 0.20 | -9.02 | 429  |
| 61  | 4   | 95  | 157 | -36 | 1.00 | 0.80 | 0.25 | 0.20 | -9.02 | 429  |
| 61  | 4   | 95  | 157 | -36 | 1.00 | 0.80 | 0.25 | 0.20 | -9.02 | 429  |
| 61  | 4   | 95  | 157 | -36 | 1.00 | 0.80 | 0.25 | 0.20 | -9.02 | 429  |
| 126 | 8.3 | 197 | 156 | -75 | 2.02 | 1.66 | 0.24 | 0.20 | -9.00 | 1110 |

|     |     |     |     |     |      |      |      |      |       |      |
|-----|-----|-----|-----|-----|------|------|------|------|-------|------|
| 61  | 4   | 95  | 156 | -36 | 1.00 | 0.80 | 0.25 | 0.20 | -8.97 | 429  |
| 61  | 4   | 95  | 156 | -36 | 1.00 | 0.80 | 0.25 | 0.20 | -8.97 | 429  |
| 61  | 4   | 95  | 156 | -36 | 1.00 | 0.80 | 0.25 | 0.20 | -8.97 | 429  |
| 61  | 4.0 | 95  | 156 | -36 | 1.00 | 0.80 | 0.25 | 0.20 | -8.97 | 429  |
| 46  | 3.0 | 71  | 156 | -27 | 0.76 | 0.60 | 0.25 | 0.20 | -8.92 | 271  |
| 101 | 6.6 | 156 | 155 | -59 | 1.63 | 1.33 | 0.25 | 0.20 | -8.89 | 841  |
| 71  | 4.6 | 109 | 154 | -40 | 1.15 | 0.93 | 0.25 | 0.20 | -8.78 | 524  |
| 71  | 4.6 | 109 | 154 | -40 | 1.15 | 0.93 | 0.25 | 0.20 | -8.78 | 524  |
| 62  | 4   | 95  | 154 | -35 | 1.01 | 0.81 | 0.25 | 0.20 | -8.78 | 429  |
| 101 | 6.5 | 154 | 153 | -56 | 1.62 | 1.33 | 0.25 | 0.20 | -8.66 | 825  |
| 101 | 6.5 | 154 | 153 | -56 | 1.62 | 1.33 | 0.25 | 0.20 | -8.66 | 825  |
| 101 | 6.5 | 154 | 153 | -56 | 1.62 | 1.33 | 0.25 | 0.20 | -8.66 | 825  |
| 101 | 6.5 | 154 | 153 | -56 | 1.62 | 1.33 | 0.25 | 0.20 | -8.66 | 825  |
| 101 | 6.5 | 154 | 153 | -56 | 1.62 | 1.33 | 0.25 | 0.20 | -8.66 | 825  |
| 101 | 6.5 | 154 | 153 | -56 | 1.62 | 1.33 | 0.25 | 0.20 | -8.66 | 825  |
| 101 | 6.5 | 154 | 153 | -56 | 1.62 | 1.33 | 0.25 | 0.20 | -8.66 | 825  |
| 101 | 6.5 | 154 | 153 | -56 | 1.62 | 1.33 | 0.25 | 0.20 | -8.66 | 825  |
| 101 | 6.5 | 154 | 153 | -56 | 1.62 | 1.33 | 0.25 | 0.20 | -8.65 | 825  |
| 81  | 5.2 | 123 | 153 | -45 | 1.30 | 1.06 | 0.25 | 0.20 | -8.64 | 619  |
| 109 | 7.0 | 166 | 153 | -60 | 1.74 | 1.43 | 0.25 | 0.20 | -8.62 | 904  |
| 109 | 7.0 | 166 | 153 | -60 | 1.74 | 1.43 | 0.25 | 0.20 | -8.62 | 904  |
| 78  | 5.0 | 119 | 153 | -43 | 1.26 | 1.02 | 0.25 | 0.20 | -8.62 | 587  |
| 114 | 7.3 | 173 | 152 | -63 | 1.82 | 1.50 | 0.25 | 0.21 | -8.58 | 952  |
| 86  | 5.5 | 130 | 152 | -47 | 1.38 | 1.13 | 0.25 | 0.21 | -8.51 | 667  |
| 141 | 9   | 213 | 152 | -77 | 2.24 | 1.85 | 0.25 | 0.21 | -8.52 | 1221 |
| 102 | 6.5 | 154 | 151 | -55 | 1.63 | 1.34 | 0.25 | 0.21 | -8.51 | 825  |
| 71  | 4.5 | 107 | 151 | -38 | 1.14 | 0.93 | 0.25 | 0.21 | -8.53 | 508  |

|     |     |     |     |     |      |      |      |      |       |     |
|-----|-----|-----|-----|-----|------|------|------|------|-------|-----|
| 71  | 4.5 | 107 | 151 | -38 | 1.14 | 0.93 | 0.25 | 0.21 | -8.53 | 508 |
| 71  | 4.5 | 107 | 151 | -38 | 1.14 | 0.93 | 0.25 | 0.21 | -8.53 | 508 |
| 71  | 4.5 | 107 | 151 | -38 | 1.14 | 0.93 | 0.25 | 0.21 | -8.53 | 508 |
| 71  | 4.5 | 107 | 151 | -38 | 1.14 | 0.93 | 0.25 | 0.21 | -8.53 | 508 |
| 79  | 5   | 119 | 151 | -43 | 1.27 | 1.04 | 0.25 | 0.21 | -8.52 | 587 |
| 79  | 5   | 119 | 151 | -43 | 1.27 | 1.04 | 0.25 | 0.21 | -8.52 | 587 |
| 79  | 5   | 119 | 151 | -43 | 1.27 | 1.04 | 0.25 | 0.21 | -8.52 | 587 |
| 79  | 5   | 119 | 151 | -43 | 1.27 | 1.04 | 0.25 | 0.21 | -8.52 | 587 |
| 79  | 5   | 119 | 151 | -43 | 1.27 | 1.04 | 0.25 | 0.21 | -8.52 | 587 |
| 79  | 5   | 119 | 151 | -43 | 1.27 | 1.04 | 0.25 | 0.21 | -8.52 | 587 |
| 71  | 4.5 | 107 | 151 | -38 | 1.14 | 0.93 | 0.25 | 0.21 | -8.45 | 508 |
| 71  | 4.5 | 107 | 151 | -38 | 1.14 | 0.93 | 0.25 | 0.21 | -8.45 | 508 |
| 71  | 4.5 | 107 | 151 | -38 | 1.14 | 0.93 | 0.25 | 0.21 | -8.45 | 508 |
| 71  | 4.5 | 107 | 151 | -38 | 1.14 | 0.93 | 0.25 | 0.21 | -8.45 | 508 |
| 71  | 4.5 | 107 | 151 | -38 | 1.14 | 0.93 | 0.25 | 0.21 | -8.45 | 508 |
| 71  | 4.5 | 107 | 151 | -38 | 1.14 | 0.93 | 0.25 | 0.21 | -8.45 | 508 |
| 71  | 4.5 | 107 | 151 | -38 | 1.14 | 0.93 | 0.25 | 0.21 | -8.45 | 508 |
| 79  | 5.0 | 119 | 151 | -42 | 1.27 | 1.04 | 0.25 | 0.21 | -8.42 | 587 |
| 79  | 5.0 | 119 | 151 | -42 | 1.27 | 1.04 | 0.25 | 0.21 | -8.42 | 587 |
| 79  | 5.0 | 119 | 151 | -42 | 1.27 | 1.04 | 0.25 | 0.21 | -8.42 | 587 |
| 79  | 5.0 | 119 | 151 | -42 | 1.27 | 1.04 | 0.25 | 0.21 | -8.42 | 587 |
| 95  | 6   | 142 | 150 | -50 | 1.52 | 1.25 | 0.25 | 0.21 | -8.38 | 746 |
| 95  | 6.0 | 142 | 150 | -50 | 1.52 | 1.25 | 0.25 | 0.21 | -8.38 | 746 |
| 111 | 7   | 166 | 150 | -59 | 1.76 | 1.46 | 0.25 | 0.21 | -8.36 | 904 |
| 111 | 7   | 166 | 150 | -59 | 1.76 | 1.46 | 0.25 | 0.21 | -8.36 | 904 |
| 111 | 7   | 166 | 150 | -59 | 1.76 | 1.46 | 0.25 | 0.21 | -8.36 | 904 |
| 103 | 6.5 | 154 | 150 | -54 | 1.64 | 1.35 | 0.25 | 0.21 | -8.35 | 825 |

|     |     |     |     |     |      |      |      |      |       |      |
|-----|-----|-----|-----|-----|------|------|------|------|-------|------|
| 95  | 6   | 142 | 150 | -50 | 1.52 | 1.25 | 0.25 | 0.21 | -8.34 | 746  |
| 111 | 7   | 166 | 150 | -58 | 1.76 | 1.46 | 0.25 | 0.21 | -8.35 | 904  |
| 111 | 7   | 166 | 150 | -58 | 1.76 | 1.46 | 0.25 | 0.21 | -8.35 | 904  |
| 111 | 7   | 166 | 150 | -58 | 1.76 | 1.46 | 0.25 | 0.21 | -8.35 | 904  |
| 111 | 7   | 166 | 150 | -58 | 1.76 | 1.46 | 0.25 | 0.21 | -8.35 | 904  |
| 111 | 7   | 166 | 150 | -58 | 1.76 | 1.46 | 0.25 | 0.21 | -8.35 | 904  |
| 111 | 7   | 166 | 150 | -58 | 1.76 | 1.46 | 0.25 | 0.21 | -8.35 | 904  |
| 111 | 7   | 166 | 150 | -58 | 1.76 | 1.46 | 0.25 | 0.21 | -8.35 | 904  |
| 111 | 7   | 166 | 150 | -58 | 1.76 | 1.46 | 0.25 | 0.21 | -8.35 | 904  |
| 111 | 7   | 166 | 150 | -58 | 1.76 | 1.46 | 0.25 | 0.21 | -8.35 | 904  |
| 111 | 7   | 166 | 150 | -58 | 1.76 | 1.46 | 0.25 | 0.21 | -8.35 | 904  |
| 111 | 7   | 166 | 150 | -58 | 1.76 | 1.46 | 0.25 | 0.21 | -8.35 | 904  |
| 111 | 7   | 166 | 150 | -58 | 1.76 | 1.46 | 0.25 | 0.21 | -8.35 | 904  |
| 111 | 7   | 166 | 150 | -58 | 1.76 | 1.46 | 0.25 | 0.21 | -8.35 | 904  |
| 111 | 7   | 166 | 150 | -58 | 1.76 | 1.46 | 0.25 | 0.21 | -8.35 | 904  |
| 111 | 7.0 | 166 | 150 | -58 | 1.76 | 1.46 | 0.25 | 0.21 | -8.35 | 904  |
| 111 | 7.0 | 166 | 150 | -58 | 1.76 | 1.46 | 0.25 | 0.21 | -8.35 | 904  |
| 111 | 7.0 | 166 | 150 | -58 | 1.76 | 1.46 | 0.25 | 0.21 | -8.35 | 904  |
| 111 | 7.0 | 166 | 150 | -58 | 1.76 | 1.46 | 0.25 | 0.21 | -8.35 | 904  |
| 111 | 7.0 | 166 | 150 | -58 | 1.76 | 1.46 | 0.25 | 0.21 | -8.35 | 904  |
| 127 | 8   | 190 | 150 | -67 | 2.01 | 1.67 | 0.25 | 0.21 | -8.32 | 1062 |
| 51  | 3.2 | 76  | 150 | -27 | 0.83 | 0.67 | 0.26 | 0.21 | -8.32 | 302  |
| 110 | 6.9 | 164 | 149 | -57 | 1.75 | 1.45 | 0.25 | 0.21 | -8.33 | 888  |
| 56  | 3.5 | 83  | 149 | -29 | 0.91 | 0.73 | 0.26 | 0.21 | -8.25 | 350  |
| 96  | 6   | 142 | 149 | -49 | 1.53 | 1.26 | 0.25 | 0.21 | -8.21 | 746  |
| 96  | 6.0 | 142 | 149 | -49 | 1.53 | 1.26 | 0.25 | 0.21 | -8.21 | 746  |
| 96  | 6.0 | 142 | 149 | -49 | 1.53 | 1.26 | 0.25 | 0.21 | -8.21 | 746  |
| 136 | 8.5 | 201 | 148 | -70 | 2.15 | 1.79 | 0.25 | 0.21 | -8.20 | 1142 |

|     |     |     |     |     |      |      |      |      |       |      |
|-----|-----|-----|-----|-----|------|------|------|------|-------|------|
| 96  | 6   | 142 | 148 | -49 | 1.53 | 1.26 | 0.25 | 0.21 | -8.18 | 746  |
| 96  | 6   | 142 | 148 | -49 | 1.53 | 1.26 | 0.25 | 0.21 | -8.18 | 746  |
| 81  | 5   | 119 | 147 | -41 | 1.29 | 1.06 | 0.26 | 0.21 | -8.13 | 587  |
| 81  | 5   | 119 | 147 | -41 | 1.29 | 1.06 | 0.26 | 0.21 | -8.13 | 587  |
| 81  | 5   | 119 | 147 | -41 | 1.29 | 1.06 | 0.26 | 0.21 | -8.13 | 587  |
| 81  | 5   | 119 | 147 | -41 | 1.29 | 1.06 | 0.26 | 0.21 | -8.13 | 587  |
| 81  | 5   | 119 | 147 | -41 | 1.29 | 1.06 | 0.26 | 0.21 | -8.13 | 587  |
| 81  | 5   | 119 | 147 | -41 | 1.29 | 1.06 | 0.26 | 0.21 | -8.13 | 587  |
| 81  | 5   | 119 | 147 | -41 | 1.29 | 1.06 | 0.26 | 0.21 | -8.13 | 587  |
| 81  | 5   | 119 | 147 | -41 | 1.29 | 1.06 | 0.26 | 0.21 | -8.13 | 587  |
| 81  | 5   | 119 | 147 | -41 | 1.29 | 1.06 | 0.26 | 0.21 | -8.13 | 587  |
| 113 | 7   | 166 | 147 | -57 | 1.79 | 1.48 | 0.26 | 0.21 | -8.08 | 904  |
| 121 | 7.5 | 178 | 147 | -61 | 1.91 | 1.59 | 0.25 | 0.21 | -8.07 | 983  |
| 121 | 7.5 | 178 | 147 | -61 | 1.91 | 1.59 | 0.25 | 0.21 | -8.07 | 983  |
| 113 | 7   | 166 | 147 | -56 | 1.79 | 1.48 | 0.26 | 0.21 | -8.07 | 904  |
| 113 | 7.0 | 166 | 147 | -56 | 1.79 | 1.48 | 0.26 | 0.21 | -8.07 | 904  |
| 71  | 4.4 | 104 | 147 | -35 | 1.14 | 0.93 | 0.26 | 0.21 | -8.04 | 492  |
| 131 | 8.1 | 192 | 147 | -65 | 2.06 | 1.72 | 0.25 | 0.21 | -8.03 | 1078 |
| 81  | 5   | 119 | 147 | -40 | 1.29 | 1.06 | 0.26 | 0.21 | -8.03 | 587  |
| 81  | 5   | 119 | 147 | -40 | 1.29 | 1.06 | 0.26 | 0.21 | -8.03 | 587  |
| 81  | 5.0 | 119 | 147 | -40 | 1.29 | 1.06 | 0.26 | 0.21 | -8.03 | 587  |
| 81  | 5.0 | 119 | 147 | -40 | 1.29 | 1.06 | 0.26 | 0.21 | -8.03 | 587  |
| 81  | 5.0 | 119 | 147 | -40 | 1.29 | 1.06 | 0.26 | 0.21 | -8.03 | 587  |
| 65  | 4   | 95  | 147 | -32 | 1.04 | 0.85 | 0.26 | 0.21 | -8.05 | 429  |
| 65  | 4   | 95  | 147 | -32 | 1.04 | 0.85 | 0.26 | 0.21 | -8.05 | 429  |
| 65  | 4   | 95  | 147 | -32 | 1.04 | 0.85 | 0.26 | 0.21 | -8.05 | 429  |
| 65  | 4   | 95  | 147 | -32 | 1.04 | 0.85 | 0.26 | 0.21 | -8.05 | 429  |



|     |      |     |     |     |      |      |      |      |       |      |
|-----|------|-----|-----|-----|------|------|------|------|-------|------|
| 170 | 10.5 | 249 | 147 | -84 | 2.67 | 2.24 | 0.25 | 0.21 | -8.00 | 1458 |
| 91  | 5.6  | 133 | 147 | -45 | 1.44 | 1.20 | 0.26 | 0.21 | -8.02 | 682  |
| 86  | 5.3  | 126 | 147 | -42 | 1.37 | 1.13 | 0.26 | 0.21 | -8.00 | 635  |
| 114 | 7    | 166 | 146 | -56 | 1.80 | 1.50 | 0.26 | 0.21 | -7.94 | 904  |
| 101 | 6.2  | 147 | 146 | -49 | 1.60 | 1.33 | 0.26 | 0.21 | -7.93 | 777  |
| 106 | 6.5  | 154 | 146 | -51 | 1.67 | 1.39 | 0.26 | 0.21 | -7.91 | 825  |
| 106 | 6.5  | 154 | 146 | -51 | 1.67 | 1.39 | 0.26 | 0.21 | -7.90 | 825  |
| 41  | 2.5  | 59  | 146 | -20 | 0.67 | 0.54 | 0.27 | 0.21 | -7.90 | 192  |
| 147 | 9    | 213 | 145 | -71 | 2.30 | 1.93 | 0.26 | 0.21 | -7.87 | 1221 |
| 131 | 8    | 190 | 145 | -63 | 2.06 | 1.72 | 0.26 | 0.22 | -7.88 | 1062 |
| 131 | 8    | 190 | 145 | -63 | 2.06 | 1.72 | 0.26 | 0.22 | -7.88 | 1062 |
| 131 | 8    | 190 | 145 | -63 | 2.06 | 1.72 | 0.26 | 0.22 | -7.88 | 1062 |
| 131 | 8    | 190 | 145 | -63 | 2.06 | 1.72 | 0.26 | 0.22 | -7.88 | 1062 |
| 131 | 8    | 190 | 145 | -63 | 2.06 | 1.72 | 0.26 | 0.22 | -7.83 | 1062 |
| 131 | 8    | 190 | 145 | -63 | 2.06 | 1.72 | 0.26 | 0.22 | -7.83 | 1062 |
| 131 | 8    | 190 | 145 | -63 | 2.06 | 1.72 | 0.26 | 0.22 | -7.83 | 1062 |
| 131 | 8    | 190 | 145 | -63 | 2.06 | 1.72 | 0.26 | 0.22 | -7.83 | 1062 |
| 131 | 8    | 190 | 145 | -63 | 2.06 | 1.72 | 0.26 | 0.22 | -7.83 | 1062 |
| 131 | 8    | 190 | 145 | -63 | 2.06 | 1.72 | 0.26 | 0.22 | -7.83 | 1062 |
| 131 | 8    | 190 | 145 | -63 | 2.06 | 1.72 | 0.26 | 0.22 | -7.83 | 1062 |
| 131 | 8    | 190 | 145 | -63 | 2.06 | 1.72 | 0.26 | 0.22 | -7.83 | 1062 |
| 131 | 8    | 190 | 145 | -63 | 2.06 | 1.72 | 0.26 | 0.22 | -7.83 | 1062 |
| 131 | 8    | 190 | 145 | -63 | 2.06 | 1.72 | 0.26 | 0.22 | -7.83 | 1062 |
| 131 | 8    | 190 | 145 | -63 | 2.06 | 1.72 | 0.26 | 0.22 | -7.83 | 1062 |
| 131 | 8.0  | 190 | 145 | -63 | 2.06 | 1.72 | 0.26 | 0.22 | -7.83 | 1062 |
| 131 | 8.0  | 190 | 145 | -63 | 2.06 | 1.72 | 0.26 | 0.22 | -7.83 | 1062 |
| 131 | 8.0  | 190 | 145 | -63 | 2.06 | 1.72 | 0.26 | 0.22 | -7.83 | 1062 |

|     |     |     |     |     |      |      |      |      |       |      |
|-----|-----|-----|-----|-----|------|------|------|------|-------|------|
| 123 | 7.5 | 178 | 145 | -59 | 1.93 | 1.62 | 0.26 | 0.22 | -7.81 | 983  |
| 66  | 4   | 95  | 145 | -31 | 1.05 | 0.87 | 0.26 | 0.22 | -7.80 | 429  |
| 71  | 4.3 | 102 | 144 | -33 | 1.13 | 0.93 | 0.26 | 0.22 | -7.76 | 477  |
| 71  | 4.3 | 102 | 144 | -33 | 1.13 | 0.93 | 0.26 | 0.22 | -7.76 | 477  |
| 83  | 5   | 119 | 144 | -39 | 1.31 | 1.09 | 0.26 | 0.22 | -7.74 | 587  |
| 91  | 5.5 | 130 | 144 | -42 | 1.44 | 1.20 | 0.26 | 0.22 | -7.69 | 667  |
| 91  | 5.5 | 130 | 144 | -42 | 1.44 | 1.20 | 0.26 | 0.22 | -7.69 | 667  |
| 91  | 5.5 | 130 | 144 | -42 | 1.44 | 1.20 | 0.26 | 0.22 | -7.69 | 667  |
| 91  | 5.5 | 130 | 144 | -42 | 1.44 | 1.20 | 0.26 | 0.22 | -7.69 | 667  |
| 91  | 5.5 | 130 | 144 | -42 | 1.44 | 1.20 | 0.26 | 0.22 | -7.69 | 667  |
| 91  | 5.5 | 130 | 144 | -42 | 1.44 | 1.20 | 0.26 | 0.22 | -7.69 | 667  |
| 91  | 5.5 | 130 | 144 | -42 | 1.44 | 1.20 | 0.26 | 0.22 | -7.69 | 667  |
| 91  | 5.5 | 130 | 144 | -42 | 1.44 | 1.20 | 0.26 | 0.22 | -7.69 | 667  |
| 91  | 5.5 | 130 | 144 | -42 | 1.44 | 1.20 | 0.26 | 0.22 | -7.69 | 667  |
| 91  | 5.5 | 130 | 144 | -42 | 1.44 | 1.20 | 0.26 | 0.22 | -7.69 | 667  |
| 91  | 5.5 | 130 | 144 | -42 | 1.44 | 1.20 | 0.26 | 0.22 | -7.69 | 667  |
| 91  | 5.5 | 130 | 144 | -42 | 1.44 | 1.20 | 0.26 | 0.22 | -7.69 | 667  |
| 91  | 5.5 | 130 | 144 | -42 | 1.44 | 1.20 | 0.26 | 0.22 | -7.69 | 667  |
| 116 | 7   | 166 | 143 | -54 | 1.82 | 1.52 | 0.26 | 0.22 | -7.65 | 904  |
| 91  | 5.5 | 130 | 143 | -42 | 1.44 | 1.20 | 0.26 | 0.22 | -7.62 | 667  |
| 91  | 5.5 | 130 | 143 | -42 | 1.44 | 1.20 | 0.26 | 0.22 | -7.62 | 667  |
| 91  | 5.5 | 130 | 143 | -42 | 1.44 | 1.20 | 0.26 | 0.22 | -7.62 | 667  |
| 133 | 8   | 190 | 143 | -61 | 2.08 | 1.75 | 0.26 | 0.22 | -7.64 | 1062 |
| 96  | 5.8 | 137 | 143 | -44 | 1.51 | 1.26 | 0.26 | 0.22 | -7.60 | 714  |
| 78  | 4.7 | 111 | 143 | -36 | 1.24 | 1.02 | 0.26 | 0.22 | -7.57 | 540  |
| 125 | 7.5 | 178 | 143 | -57 | 1.95 | 1.64 | 0.26 | 0.22 | -7.55 | 983  |
| 67  | 4   | 95  | 142 | -30 | 1.06 | 0.88 | 0.27 | 0.22 | -7.56 | 429  |
| 137 | 8.2 | 194 | 142 | -62 | 2.14 | 1.80 | 0.26 | 0.22 | -7.51 | 1094 |

|     |     |     |     |     |      |      |      |      |       |      |
|-----|-----|-----|-----|-----|------|------|------|------|-------|------|
| 67  | 4.0 | 95  | 142 | -30 | 1.06 | 0.88 | 0.27 | 0.22 | -7.51 | 429  |
| 126 | 7.5 | 178 | 142 | -56 | 1.97 | 1.66 | 0.26 | 0.22 | -7.46 | 983  |
| 71  | 4.2 | 100 | 141 | -31 | 1.12 | 0.93 | 0.27 | 0.22 | -7.47 | 461  |
| 71  | 4.2 | 100 | 141 | -31 | 1.12 | 0.93 | 0.27 | 0.22 | -7.47 | 461  |
| 71  | 4.2 | 100 | 141 | -31 | 1.12 | 0.93 | 0.27 | 0.22 | -7.47 | 461  |
| 131 | 7.8 | 185 | 141 | -58 | 2.04 | 1.72 | 0.26 | 0.22 | -7.43 | 1031 |
| 126 | 7.5 | 178 | 141 | -56 | 1.97 | 1.66 | 0.26 | 0.22 | -7.42 | 983  |
| 121 | 7.2 | 171 | 141 | -53 | 1.89 | 1.59 | 0.26 | 0.22 | -7.42 | 936  |
| 101 | 6   | 142 | 141 | -44 | 1.58 | 1.33 | 0.26 | 0.22 | -7.40 | 746  |
| 101 | 6   | 142 | 141 | -44 | 1.58 | 1.33 | 0.26 | 0.22 | -7.40 | 746  |
| 101 | 6   | 142 | 141 | -44 | 1.58 | 1.33 | 0.26 | 0.22 | -7.40 | 746  |
| 101 | 6   | 142 | 141 | -44 | 1.58 | 1.33 | 0.26 | 0.22 | -7.40 | 746  |
| 101 | 6   | 142 | 141 | -44 | 1.58 | 1.33 | 0.26 | 0.22 | -7.40 | 746  |
| 101 | 6   | 142 | 141 | -44 | 1.58 | 1.33 | 0.26 | 0.22 | -7.40 | 746  |
| 101 | 6   | 142 | 141 | -44 | 1.58 | 1.33 | 0.26 | 0.22 | -7.40 | 746  |
| 101 | 6   | 142 | 141 | -44 | 1.58 | 1.33 | 0.26 | 0.22 | -7.40 | 746  |
| 101 | 6   | 142 | 141 | -44 | 1.58 | 1.33 | 0.26 | 0.22 | -7.40 | 746  |
| 101 | 6   | 142 | 141 | -44 | 1.58 | 1.33 | 0.26 | 0.22 | -7.40 | 746  |
| 101 | 6   | 142 | 141 | -44 | 1.58 | 1.33 | 0.26 | 0.22 | -7.40 | 746  |
| 101 | 6   | 142 | 141 | -44 | 1.58 | 1.33 | 0.26 | 0.22 | -7.40 | 746  |
| 101 | 6.0 | 142 | 141 | -44 | 1.58 | 1.33 | 0.26 | 0.22 | -7.40 | 746  |
| 101 | 6.0 | 142 | 141 | -44 | 1.58 | 1.33 | 0.26 | 0.22 | -7.40 | 746  |
| 101 | 6.0 | 142 | 141 | -44 | 1.58 | 1.33 | 0.26 | 0.22 | -7.40 | 746  |
| 101 | 6.0 | 142 | 141 | -44 | 1.58 | 1.33 | 0.26 | 0.22 | -7.40 | 746  |
| 91  | 5.4 | 128 | 141 | -40 | 1.43 | 1.20 | 0.26 | 0.22 | -7.39 | 651  |
| 91  | 5.4 | 128 | 141 | -40 | 1.43 | 1.20 | 0.26 | 0.22 | -7.39 | 651  |
| 79  | 4.7 | 111 | 141 | -35 | 1.25 | 1.04 | 0.27 | 0.22 | -7.36 | 540  |
| 101 | 6   | 142 | 141 | -44 | 1.58 | 1.33 | 0.26 | 0.22 | -7.37 | 746  |

|     |     |     |     |     |      |      |      |      |       |     |
|-----|-----|-----|-----|-----|------|------|------|------|-------|-----|
| 101 | 6   | 142 | 141 | -44 | 1.58 | 1.33 | 0.26 | 0.22 | -7.37 | 746 |
| 101 | 6   | 142 | 141 | -44 | 1.58 | 1.33 | 0.26 | 0.22 | -7.37 | 746 |
| 101 | 6   | 142 | 141 | -44 | 1.58 | 1.33 | 0.26 | 0.22 | -7.37 | 746 |
| 101 | 6   | 142 | 141 | -44 | 1.58 | 1.33 | 0.26 | 0.22 | -7.37 | 746 |
| 101 | 6   | 142 | 141 | -44 | 1.58 | 1.33 | 0.26 | 0.22 | -7.37 | 746 |
| 101 | 6   | 142 | 141 | -44 | 1.58 | 1.33 | 0.26 | 0.22 | -7.37 | 746 |
| 101 | 6   | 142 | 141 | -44 | 1.58 | 1.33 | 0.26 | 0.22 | -7.37 | 746 |
| 101 | 6   | 142 | 141 | -44 | 1.58 | 1.33 | 0.26 | 0.22 | -7.37 | 746 |
| 101 | 6   | 142 | 141 | -44 | 1.58 | 1.33 | 0.26 | 0.22 | -7.37 | 746 |
| 76  | 4.5 | 107 | 141 | -33 | 1.20 | 1.00 | 0.27 | 0.22 | -7.37 | 508 |
| 71  | 4.2 | 100 | 141 | -31 | 1.12 | 0.93 | 0.27 | 0.22 | -7.36 | 461 |
| 93  | 5.5 | 130 | 141 | -40 | 1.46 | 1.22 | 0.27 | 0.22 | -7.33 | 667 |
| 51  | 3   | 71  | 140 | -22 | 0.82 | 0.67 | 0.27 | 0.22 | -7.29 | 271 |
| 51  | 3   | 71  | 140 | -22 | 0.82 | 0.67 | 0.27 | 0.22 | -7.26 | 271 |
| 51  | 3   | 71  | 140 | -22 | 0.82 | 0.67 | 0.27 | 0.22 | -7.26 | 271 |
| 119 | 7   | 166 | 140 | -51 | 1.85 | 1.56 | 0.26 | 0.22 | -7.25 | 904 |
| 119 | 7   | 166 | 140 | -51 | 1.85 | 1.56 | 0.26 | 0.22 | -7.25 | 904 |
| 102 | 6   | 142 | 140 | -43 | 1.59 | 1.34 | 0.27 | 0.22 | -7.21 | 746 |
| 111 | 6.5 | 154 | 139 | -47 | 1.73 | 1.46 | 0.27 | 0.22 | -7.16 | 825 |
| 111 | 6.5 | 154 | 139 | -47 | 1.73 | 1.46 | 0.27 | 0.22 | -7.16 | 825 |
| 111 | 6.5 | 154 | 139 | -47 | 1.73 | 1.46 | 0.27 | 0.22 | -7.16 | 825 |
| 111 | 6.5 | 154 | 139 | -47 | 1.73 | 1.46 | 0.27 | 0.22 | -7.16 | 825 |
| 111 | 6.5 | 154 | 139 | -47 | 1.73 | 1.46 | 0.27 | 0.22 | -7.16 | 825 |
| 111 | 6.5 | 154 | 139 | -47 | 1.73 | 1.46 | 0.27 | 0.22 | -7.16 | 825 |
| 111 | 6.5 | 154 | 139 | -47 | 1.73 | 1.46 | 0.27 | 0.22 | -7.16 | 825 |
| 111 | 6.5 | 154 | 139 | -47 | 1.73 | 1.46 | 0.27 | 0.22 | -7.16 | 825 |
| 111 | 6.5 | 154 | 139 | -47 | 1.73 | 1.46 | 0.27 | 0.22 | -7.16 | 825 |
| 111 | 6.5 | 154 | 139 | -47 | 1.73 | 1.46 | 0.27 | 0.22 | -7.16 | 825 |

|     |     |     |     |     |      |      |      |      |       |     |
|-----|-----|-----|-----|-----|------|------|------|------|-------|-----|
| 111 | 6.5 | 154 | 139 | -47 | 1.73 | 1.46 | 0.27 | 0.22 | -7.16 | 825 |
| 111 | 6.5 | 154 | 139 | -47 | 1.73 | 1.46 | 0.27 | 0.22 | -7.16 | 825 |
| 111 | 6.5 | 154 | 139 | -47 | 1.73 | 1.46 | 0.27 | 0.22 | -7.16 | 825 |
| 111 | 6.5 | 154 | 139 | -47 | 1.73 | 1.46 | 0.27 | 0.22 | -7.16 | 825 |
| 111 | 6.5 | 154 | 139 | -47 | 1.73 | 1.46 | 0.27 | 0.22 | -7.16 | 825 |
| 111 | 6.5 | 154 | 139 | -47 | 1.73 | 1.46 | 0.27 | 0.22 | -7.16 | 825 |
| 111 | 6.5 | 154 | 139 | -47 | 1.73 | 1.46 | 0.27 | 0.22 | -7.16 | 825 |
| 111 | 6.5 | 154 | 139 | -47 | 1.73 | 1.46 | 0.27 | 0.22 | -7.16 | 825 |
| 111 | 6.5 | 154 | 139 | -47 | 1.73 | 1.46 | 0.27 | 0.22 | -7.16 | 825 |
| 111 | 6.5 | 154 | 139 | -46 | 1.73 | 1.46 | 0.27 | 0.22 | -7.15 | 825 |
| 111 | 6.5 | 154 | 139 | -46 | 1.73 | 1.46 | 0.27 | 0.22 | -7.15 | 825 |
| 111 | 6.5 | 154 | 139 | -46 | 1.73 | 1.46 | 0.27 | 0.22 | -7.15 | 825 |
| 111 | 6.5 | 154 | 139 | -46 | 1.73 | 1.46 | 0.27 | 0.22 | -7.15 | 825 |
| 111 | 6.5 | 154 | 139 | -46 | 1.73 | 1.46 | 0.27 | 0.22 | -7.15 | 825 |
| 111 | 6.5 | 154 | 139 | -46 | 1.73 | 1.46 | 0.27 | 0.22 | -7.15 | 825 |
| 106 | 6.2 | 147 | 139 | -44 | 1.65 | 1.39 | 0.27 | 0.22 | -7.15 | 777 |
| 86  | 5   | 119 | 139 | -36 | 1.35 | 1.13 | 0.27 | 0.23 | -7.15 | 587 |
| 86  | 5   | 119 | 139 | -36 | 1.35 | 1.13 | 0.27 | 0.23 | -7.15 | 587 |
| 103 | 6   | 142 | 138 | -42 | 1.60 | 1.35 | 0.27 | 0.23 | -7.08 | 746 |
| 103 | 6.0 | 142 | 138 | -42 | 1.60 | 1.35 | 0.27 | 0.23 | -7.08 | 746 |
| 74  | 4.3 | 102 | 138 | -30 | 1.16 | 0.97 | 0.27 | 0.23 | -7.08 | 477 |
| 86  | 5   | 119 | 138 | -35 | 1.35 | 1.13 | 0.27 | 0.23 | -7.05 | 587 |
| 86  | 5   | 119 | 138 | -35 | 1.35 | 1.13 | 0.27 | 0.23 | -7.05 | 587 |
| 103 | 6   | 142 | 138 | -42 | 1.60 | 1.35 | 0.27 | 0.23 | -7.04 | 746 |
| 103 | 6   | 142 | 138 | -42 | 1.60 | 1.35 | 0.27 | 0.23 | -7.04 | 746 |
| 121 | 7   | 166 | 138 | -49 | 1.87 | 1.59 | 0.27 | 0.23 | -6.97 | 904 |
| 121 | 7   | 166 | 138 | -49 | 1.87 | 1.59 | 0.27 | 0.23 | -6.97 | 904 |

|     |      |     |     |     |      |      |      |      |       |      |
|-----|------|-----|-----|-----|------|------|------|------|-------|------|
| 121 | 7    | 166 | 137 | -49 | 1.87 | 1.59 | 0.27 | 0.23 | -6.95 | 904  |
| 121 | 7.0  | 166 | 137 | -49 | 1.87 | 1.59 | 0.27 | 0.23 | -6.95 | 904  |
| 71  | 4.1  | 97  | 137 | -29 | 1.12 | 0.93 | 0.27 | 0.23 | -6.96 | 445  |
| 71  | 4.1  | 97  | 137 | -29 | 1.12 | 0.93 | 0.27 | 0.23 | -6.96 | 445  |
| 95  | 5.5  | 130 | 137 | -38 | 1.48 | 1.25 | 0.27 | 0.23 | -6.91 | 667  |
| 61  | 3.5  | 83  | 137 | -24 | 0.96 | 0.80 | 0.27 | 0.23 | -6.87 | 350  |
| 61  | 3.5  | 83  | 137 | -24 | 0.96 | 0.80 | 0.27 | 0.23 | -6.87 | 350  |
| 191 | 11.0 | 261 | 137 | -75 | 2.93 | 2.51 | 0.27 | 0.23 | -6.86 | 1537 |
| 113 | 6.5  | 154 | 137 | -45 | 1.75 | 1.48 | 0.27 | 0.23 | -6.85 | 825  |
| 113 | 6.5  | 154 | 137 | -45 | 1.75 | 1.48 | 0.27 | 0.23 | -6.85 | 825  |
| 113 | 6.5  | 154 | 137 | -45 | 1.75 | 1.48 | 0.27 | 0.23 | -6.85 | 825  |
| 101 | 5.8  | 137 | 137 | -40 | 1.57 | 1.33 | 0.27 | 0.23 | -6.84 | 714  |
| 122 | 7.0  | 166 | 136 | -48 | 1.89 | 1.60 | 0.27 | 0.23 | -6.81 | 904  |
| 96  | 5.5  | 130 | 136 | -37 | 1.49 | 1.26 | 0.27 | 0.23 | -6.80 | 667  |
| 96  | 5.5  | 130 | 136 | -37 | 1.49 | 1.26 | 0.27 | 0.23 | -6.80 | 667  |
| 96  | 5.5  | 130 | 136 | -37 | 1.49 | 1.26 | 0.27 | 0.23 | -6.80 | 667  |
| 131 | 7.5  | 178 | 136 | -51 | 2.02 | 1.72 | 0.27 | 0.23 | -6.81 | 983  |
| 131 | 7.5  | 178 | 136 | -51 | 2.02 | 1.72 | 0.27 | 0.23 | -6.77 | 983  |
| 131 | 7.5  | 178 | 136 | -51 | 2.02 | 1.72 | 0.27 | 0.23 | -6.77 | 983  |
| 131 | 7.5  | 178 | 136 | -51 | 2.02 | 1.72 | 0.27 | 0.23 | -6.77 | 983  |
| 131 | 7.5  | 178 | 136 | -51 | 2.02 | 1.72 | 0.27 | 0.23 | -6.77 | 983  |
| 131 | 7.5  | 178 | 136 | -51 | 2.02 | 1.72 | 0.27 | 0.23 | -6.77 | 983  |
| 131 | 7.5  | 178 | 136 | -51 | 2.02 | 1.72 | 0.27 | 0.23 | -6.77 | 983  |
| 79  | 4.5  | 107 | 136 | -31 | 1.23 | 1.04 | 0.27 | 0.23 | -6.79 | 508  |
| 79  | 4.5  | 107 | 136 | -31 | 1.23 | 1.04 | 0.27 | 0.23 | -6.79 | 508  |
| 79  | 4.5  | 107 | 136 | -31 | 1.23 | 1.04 | 0.27 | 0.23 | -6.79 | 508  |
| 105 | 6.0  | 142 | 136 | -41 | 1.63 | 1.38 | 0.27 | 0.23 | -6.75 | 746  |

|     |     |     |     |     |      |      |      |      |       |      |
|-----|-----|-----|-----|-----|------|------|------|------|-------|------|
| 91  | 5.2 | 123 | 136 | -35 | 1.41 | 1.20 | 0.27 | 0.23 | -6.71 | 619  |
| 79  | 4.5 | 107 | 136 | -30 | 1.23 | 1.04 | 0.27 | 0.23 | -6.72 | 508  |
| 151 | 8.6 | 204 | 135 | -57 | 2.32 | 1.99 | 0.27 | 0.23 | -6.68 | 1157 |
| 81  | 4.6 | 109 | 135 | -31 | 1.26 | 1.06 | 0.27 | 0.23 | -6.66 | 524  |
| 141 | 8   | 190 | 135 | -53 | 2.17 | 1.85 | 0.27 | 0.23 | -6.62 | 1062 |
| 141 | 8   | 190 | 135 | -53 | 2.17 | 1.85 | 0.27 | 0.23 | -6.62 | 1062 |
| 141 | 8   | 190 | 135 | -53 | 2.17 | 1.85 | 0.27 | 0.23 | -6.62 | 1062 |
| 141 | 8   | 190 | 135 | -53 | 2.17 | 1.85 | 0.27 | 0.23 | -6.62 | 1062 |
| 76  | 4.3 | 102 | 135 | -28 | 1.18 | 1.00 | 0.28 | 0.23 | -6.62 | 477  |
| 76  | 4.3 | 102 | 135 | -28 | 1.18 | 1.00 | 0.28 | 0.23 | -6.62 | 477  |
| 106 | 6   | 142 | 135 | -40 | 1.64 | 1.39 | 0.27 | 0.23 | -6.59 | 746  |
| 106 | 6   | 142 | 135 | -40 | 1.64 | 1.39 | 0.27 | 0.23 | -6.59 | 746  |
| 71  | 4   | 95  | 134 | -26 | 1.11 | 0.93 | 0.28 | 0.23 | -6.58 | 429  |
| 71  | 4   | 95  | 134 | -26 | 1.11 | 0.93 | 0.28 | 0.23 | -6.58 | 429  |
| 71  | 4   | 95  | 134 | -26 | 1.11 | 0.93 | 0.28 | 0.23 | -6.58 | 429  |
| 71  | 4   | 95  | 134 | -26 | 1.11 | 0.93 | 0.28 | 0.23 | -6.58 | 429  |
| 71  | 4   | 95  | 134 | -26 | 1.11 | 0.93 | 0.28 | 0.23 | -6.58 | 429  |
| 71  | 4   | 95  | 134 | -26 | 1.11 | 0.93 | 0.28 | 0.23 | -6.58 | 429  |
| 71  | 4   | 95  | 134 | -26 | 1.11 | 0.93 | 0.28 | 0.23 | -6.58 | 429  |
| 71  | 4   | 95  | 134 | -26 | 1.11 | 0.93 | 0.28 | 0.23 | -6.58 | 429  |
| 71  | 4   | 95  | 134 | -26 | 1.11 | 0.93 | 0.28 | 0.23 | -6.58 | 429  |
| 106 | 6   | 142 | 134 | -39 | 1.64 | 1.39 | 0.27 | 0.23 | -6.55 | 746  |
| 80  | 4.5 | 107 | 134 | -30 | 1.24 | 1.05 | 0.28 | 0.23 | -6.58 | 508  |
| 78  | 4.4 | 104 | 134 | -29 | 1.21 | 1.02 | 0.28 | 0.23 | -6.55 | 492  |
| 101 | 5.7 | 135 | 134 | -37 | 1.56 | 1.33 | 0.27 | 0.23 | -6.54 | 698  |
| 101 | 5.7 | 135 | 134 | -37 | 1.56 | 1.33 | 0.27 | 0.23 | -6.54 | 698  |
| 101 | 5.7 | 135 | 134 | -37 | 1.56 | 1.33 | 0.27 | 0.23 | -6.54 | 698  |

|     |     |     |     |     |      |      |      |      |       |      |
|-----|-----|-----|-----|-----|------|------|------|------|-------|------|
| 92  | 5.2 | 123 | 134 | -34 | 1.43 | 1.21 | 0.27 | 0.23 | -6.53 | 619  |
| 71  | 4   | 95  | 134 | -26 | 1.11 | 0.93 | 0.28 | 0.23 | -6.53 | 429  |
| 71  | 4   | 95  | 134 | -26 | 1.11 | 0.93 | 0.28 | 0.23 | -6.53 | 429  |
| 71  | 4   | 95  | 134 | -26 | 1.11 | 0.93 | 0.28 | 0.23 | -6.53 | 429  |
| 71  | 4.0 | 95  | 134 | -26 | 1.11 | 0.93 | 0.28 | 0.23 | -6.53 | 429  |
| 71  | 4.0 | 95  | 134 | -26 | 1.11 | 0.93 | 0.28 | 0.23 | -6.53 | 429  |
| 71  | 4.0 | 95  | 134 | -26 | 1.11 | 0.93 | 0.28 | 0.23 | -6.53 | 429  |
| 71  | 4.0 | 95  | 134 | -26 | 1.11 | 0.93 | 0.28 | 0.23 | -6.53 | 429  |
| 71  | 4.0 | 95  | 134 | -26 | 1.11 | 0.93 | 0.28 | 0.23 | -6.53 | 429  |
| 75  | 4.2 | 100 | 134 | -27 | 1.17 | 0.98 | 0.28 | 0.23 | -6.54 | 461  |
| 80  | 4.5 | 107 | 134 | -29 | 1.24 | 1.05 | 0.28 | 0.23 | -6.50 | 508  |
| 107 | 6   | 142 | 133 | -39 | 1.65 | 1.41 | 0.27 | 0.23 | -6.43 | 746  |
| 107 | 6   | 142 | 133 | -39 | 1.65 | 1.41 | 0.27 | 0.23 | -6.43 | 746  |
| 116 | 6.5 | 154 | 133 | -42 | 1.78 | 1.52 | 0.27 | 0.23 | -6.41 | 825  |
| 116 | 6.5 | 154 | 133 | -42 | 1.78 | 1.52 | 0.27 | 0.23 | -6.41 | 825  |
| 125 | 7   | 166 | 133 | -45 | 1.92 | 1.64 | 0.27 | 0.23 | -6.41 | 904  |
| 116 | 6.5 | 154 | 133 | -42 | 1.78 | 1.52 | 0.27 | 0.23 | -6.40 | 825  |
| 98  | 5.5 | 130 | 133 | -35 | 1.51 | 1.29 | 0.28 | 0.23 | -6.38 | 667  |
| 161 | 9   | 213 | 133 | -57 | 2.46 | 2.12 | 0.27 | 0.24 | -6.35 | 1221 |
| 161 | 9   | 213 | 133 | -57 | 2.46 | 2.12 | 0.27 | 0.24 | -6.35 | 1221 |
| 81  | 4.5 | 107 | 133 | -29 | 1.25 | 1.06 | 0.28 | 0.24 | -6.36 | 508  |
| 81  | 4.5 | 107 | 133 | -29 | 1.25 | 1.06 | 0.28 | 0.24 | -6.36 | 508  |
| 81  | 4.5 | 107 | 133 | -29 | 1.25 | 1.06 | 0.28 | 0.24 | -6.36 | 508  |
| 72  | 4.0 | 95  | 132 | -25 | 1.12 | 0.94 | 0.28 | 0.24 | -6.29 | 429  |
| 81  | 4.5 | 107 | 132 | -28 | 1.25 | 1.06 | 0.28 | 0.24 | -6.28 | 508  |
| 81  | 4.5 | 107 | 132 | -28 | 1.25 | 1.06 | 0.28 | 0.24 | -6.28 | 508  |
| 81  | 4.5 | 107 | 132 | -28 | 1.25 | 1.06 | 0.28 | 0.24 | -6.28 | 508  |



[illegible]

|     |     |     |     |     |      |      |      |      |       |      |
|-----|-----|-----|-----|-----|------|------|------|------|-------|------|
| 91  | 5   | 119 | 131 | -31 | 1.40 | 1.20 | 0.28 | 0.24 | -6.18 | 587  |
| 91  | 5   | 119 | 131 | -31 | 1.40 | 1.20 | 0.28 | 0.24 | -6.18 | 587  |
| 136 | 7.5 | 178 | 131 | -46 | 2.08 | 1.79 | 0.28 | 0.24 | -6.16 | 983  |
| 69  | 3.8 | 90  | 131 | -23 | 1.07 | 0.91 | 0.28 | 0.24 | -6.14 | 397  |
| 98  | 5.4 | 128 | 131 | -33 | 1.51 | 1.29 | 0.28 | 0.24 | -6.13 | 651  |
| 127 | 7   | 166 | 131 | -43 | 1.94 | 1.67 | 0.28 | 0.24 | -6.12 | 904  |
| 131 | 7.2 | 171 | 131 | -44 | 2.00 | 1.72 | 0.28 | 0.24 | -6.11 | 936  |
| 91  | 5   | 119 | 131 | -30 | 1.40 | 1.20 | 0.28 | 0.24 | -6.08 | 587  |
| 91  | 5   | 119 | 131 | -30 | 1.40 | 1.20 | 0.28 | 0.24 | -6.08 | 587  |
| 91  | 5   | 119 | 131 | -30 | 1.40 | 1.20 | 0.28 | 0.24 | -6.08 | 587  |
| 91  | 5   | 119 | 131 | -30 | 1.40 | 1.20 | 0.28 | 0.24 | -6.08 | 587  |
| 91  | 5   | 119 | 131 | -30 | 1.40 | 1.20 | 0.28 | 0.24 | -6.08 | 587  |
| 91  | 5   | 119 | 131 | -30 | 1.40 | 1.20 | 0.28 | 0.24 | -6.08 | 587  |
| 91  | 5   | 119 | 131 | -30 | 1.40 | 1.20 | 0.28 | 0.24 | -6.08 | 587  |
| 91  | 5   | 119 | 131 | -30 | 1.40 | 1.20 | 0.28 | 0.24 | -6.08 | 587  |
| 91  | 5   | 119 | 131 | -30 | 1.40 | 1.20 | 0.28 | 0.24 | -6.08 | 587  |
| 91  | 5.0 | 119 | 131 | -30 | 1.40 | 1.20 | 0.28 | 0.24 | -6.08 | 587  |
| 91  | 5.0 | 119 | 131 | -30 | 1.40 | 1.20 | 0.28 | 0.24 | -6.08 | 587  |
| 91  | 5.0 | 119 | 131 | -30 | 1.40 | 1.20 | 0.28 | 0.24 | -6.08 | 587  |
| 91  | 5.0 | 119 | 131 | -30 | 1.40 | 1.20 | 0.28 | 0.24 | -6.08 | 587  |
| 91  | 5.0 | 119 | 131 | -30 | 1.40 | 1.20 | 0.28 | 0.24 | -6.08 | 587  |
| 91  | 5.0 | 119 | 131 | -30 | 1.40 | 1.20 | 0.28 | 0.24 | -6.08 | 587  |
| 91  | 5.0 | 119 | 131 | -30 | 1.40 | 1.20 | 0.28 | 0.24 | -6.08 | 587  |
| 146 | 8   | 190 | 130 | -48 | 2.22 | 1.92 | 0.28 | 0.24 | -6.01 | 1062 |
| 71  | 3.9 | 92  | 130 | -23 | 1.10 | 0.93 | 0.28 | 0.24 | -5.98 | 413  |
| 106 | 5.8 | 137 | 130 | -34 | 1.62 | 1.39 | 0.28 | 0.24 | -5.92 | 714  |
| 101 | 5.5 | 130 | 129 | -33 | 1.55 | 1.33 | 0.28 | 0.24 | -5.91 | 667  |
| 101 | 5.5 | 130 | 129 | -33 | 1.55 | 1.33 | 0.28 | 0.24 | -5.91 | 667  |

[illegible]

[illegible]

|     |     |     |     |     |      |      |      |      |       |      |
|-----|-----|-----|-----|-----|------|------|------|------|-------|------|
| 111 | 6   | 142 | 128 | -34 | 1.69 | 1.46 | 0.28 | 0.24 | -5.74 | 746  |
| 111 | 6   | 142 | 128 | -34 | 1.69 | 1.46 | 0.28 | 0.24 | -5.74 | 746  |
| 111 | 6   | 142 | 128 | -34 | 1.69 | 1.46 | 0.28 | 0.24 | -5.74 | 746  |
| 111 | 6   | 142 | 128 | -34 | 1.69 | 1.46 | 0.28 | 0.24 | -5.74 | 746  |
| 111 | 6   | 142 | 128 | -34 | 1.69 | 1.46 | 0.28 | 0.24 | -5.74 | 746  |
| 111 | 6   | 142 | 128 | -34 | 1.69 | 1.46 | 0.28 | 0.24 | -5.74 | 746  |
| 111 | 6   | 142 | 128 | -34 | 1.69 | 1.46 | 0.28 | 0.24 | -5.74 | 746  |
| 111 | 6   | 142 | 128 | -34 | 1.69 | 1.46 | 0.28 | 0.24 | -5.74 | 746  |
| 111 | 6   | 142 | 128 | -34 | 1.69 | 1.46 | 0.28 | 0.24 | -5.74 | 746  |
| 111 | 6   | 142 | 128 | -34 | 1.69 | 1.46 | 0.28 | 0.24 | -5.74 | 746  |
| 111 | 6   | 142 | 128 | -34 | 1.69 | 1.46 | 0.28 | 0.24 | -5.74 | 746  |
| 139 | 7.5 | 178 | 128 | -43 | 2.11 | 1.83 | 0.28 | 0.24 | -5.73 | 983  |
| 141 | 7.6 | 180 | 128 | -43 | 2.14 | 1.85 | 0.28 | 0.24 | -5.70 | 999  |
| 106 | 5.7 | 135 | 128 | -32 | 1.62 | 1.39 | 0.28 | 0.24 | -5.67 | 698  |
| 121 | 6.5 | 154 | 128 | -37 | 1.84 | 1.59 | 0.28 | 0.24 | -5.66 | 825  |
| 121 | 6.5 | 154 | 128 | -37 | 1.84 | 1.59 | 0.28 | 0.24 | -5.66 | 825  |
| 121 | 6.5 | 154 | 128 | -37 | 1.84 | 1.59 | 0.28 | 0.24 | -5.66 | 825  |
| 121 | 6.5 | 154 | 128 | -37 | 1.84 | 1.59 | 0.28 | 0.24 | -5.66 | 825  |
| 121 | 6.5 | 154 | 128 | -37 | 1.84 | 1.59 | 0.28 | 0.24 | -5.66 | 825  |
| 121 | 6.5 | 154 | 128 | -37 | 1.84 | 1.59 | 0.28 | 0.24 | -5.66 | 825  |
| 121 | 6.5 | 154 | 128 | -37 | 1.84 | 1.59 | 0.28 | 0.24 | -5.65 | 825  |
| 121 | 6.5 | 154 | 128 | -37 | 1.84 | 1.59 | 0.28 | 0.24 | -5.65 | 825  |
| 121 | 6.5 | 154 | 128 | -37 | 1.84 | 1.59 | 0.28 | 0.24 | -5.65 | 825  |
| 121 | 6.5 | 154 | 128 | -37 | 1.84 | 1.59 | 0.28 | 0.24 | -5.65 | 825  |
| 121 | 6.5 | 154 | 128 | -37 | 1.84 | 1.59 | 0.28 | 0.24 | -5.65 | 825  |
| 71  | 3.8 | 90  | 127 | -21 | 1.09 | 0.93 | 0.29 | 0.25 | -5.61 | 397  |
| 181 | 9.7 | 230 | 127 | -54 | 2.73 | 2.38 | 0.28 | 0.25 | -5.60 | 1331 |

|     |     |     |     |     |      |      |      |      |       |     |
|-----|-----|-----|-----|-----|------|------|------|------|-------|-----|
| 86  | 4.6 | 109 | 127 | -26 | 1.32 | 1.13 | 0.29 | 0.25 | -5.60 | 524 |
| 75  | 4   | 95  | 127 | -22 | 1.15 | 0.98 | 0.29 | 0.25 | -5.61 | 429 |
| 131 | 7   | 166 | 127 | -39 | 1.98 | 1.72 | 0.28 | 0.25 | -5.57 | 904 |
| 131 | 7   | 166 | 127 | -39 | 1.98 | 1.72 | 0.28 | 0.25 | -5.57 | 904 |
| 131 | 7   | 166 | 127 | -39 | 1.98 | 1.72 | 0.28 | 0.25 | -5.57 | 904 |
| 131 | 7   | 166 | 127 | -39 | 1.98 | 1.72 | 0.28 | 0.25 | -5.57 | 904 |
| 131 | 7   | 166 | 127 | -39 | 1.98 | 1.72 | 0.28 | 0.25 | -5.57 | 904 |
| 131 | 7   | 166 | 127 | -39 | 1.98 | 1.72 | 0.28 | 0.25 | -5.57 | 904 |
| 131 | 7   | 166 | 127 | -39 | 1.98 | 1.72 | 0.28 | 0.25 | -5.57 | 904 |
| 131 | 7   | 166 | 127 | -39 | 1.98 | 1.72 | 0.28 | 0.25 | -5.57 | 904 |
| 131 | 7   | 166 | 127 | -39 | 1.98 | 1.72 | 0.28 | 0.25 | -5.57 | 904 |
| 131 | 7   | 166 | 127 | -39 | 1.98 | 1.72 | 0.28 | 0.25 | -5.56 | 904 |
| 131 | 7   | 166 | 127 | -39 | 1.98 | 1.72 | 0.28 | 0.25 | -5.56 | 904 |
| 131 | 7   | 166 | 127 | -39 | 1.98 | 1.72 | 0.28 | 0.25 | -5.56 | 904 |
| 131 | 7   | 166 | 127 | -39 | 1.98 | 1.72 | 0.28 | 0.25 | -5.56 | 904 |
| 131 | 7   | 166 | 127 | -39 | 1.98 | 1.72 | 0.28 | 0.25 | -5.56 | 904 |
| 131 | 7   | 166 | 127 | -39 | 1.98 | 1.72 | 0.28 | 0.25 | -5.56 | 904 |
| 131 | 7   | 166 | 127 | -39 | 1.98 | 1.72 | 0.28 | 0.25 | -5.56 | 904 |
| 131 | 7   | 166 | 127 | -39 | 1.98 | 1.72 | 0.28 | 0.25 | -5.56 | 904 |
| 131 | 7   | 166 | 127 | -39 | 1.98 | 1.72 | 0.28 | 0.25 | -5.56 | 904 |
| 131 | 7   | 166 | 127 | -39 | 1.98 | 1.72 | 0.28 | 0.25 | -5.56 | 904 |
| 131 | 7   | 166 | 127 | -39 | 1.98 | 1.72 | 0.28 | 0.25 | -5.56 | 904 |
| 131 | 7   | 166 | 127 | -39 | 1.98 | 1.72 | 0.28 | 0.25 | -5.56 | 904 |
| 131 | 7   | 166 | 127 | -39 | 1.98 | 1.72 | 0.28 | 0.25 | -5.56 | 904 |
| 131 | 7.0 | 166 | 127 | -39 | 1.98 | 1.72 | 0.28 | 0.25 | -5.56 | 904 |
| 131 | 7.0 | 166 | 127 | -39 | 1.98 | 1.72 | 0.28 | 0.25 | -5.56 | 904 |

|     |     |     |     |     |      |      |      |      |       |      |
|-----|-----|-----|-----|-----|------|------|------|------|-------|------|
| 131 | 7.0 | 166 | 127 | -39 | 1.98 | 1.72 | 0.28 | 0.25 | -5.56 | 904  |
| 131 | 7.0 | 166 | 127 | -39 | 1.98 | 1.72 | 0.28 | 0.25 | -5.56 | 904  |
| 131 | 7.0 | 166 | 127 | -39 | 1.98 | 1.72 | 0.28 | 0.25 | -5.56 | 904  |
| 131 | 7.0 | 166 | 127 | -39 | 1.98 | 1.72 | 0.28 | 0.25 | -5.56 | 904  |
| 131 | 7.0 | 166 | 127 | -39 | 1.98 | 1.72 | 0.28 | 0.25 | -5.56 | 904  |
| 131 | 7.0 | 166 | 127 | -39 | 1.98 | 1.72 | 0.28 | 0.25 | -5.56 | 904  |
| 131 | 7.0 | 166 | 127 | -39 | 1.98 | 1.72 | 0.28 | 0.25 | -5.56 | 904  |
| 131 | 7.0 | 166 | 127 | -39 | 1.98 | 1.72 | 0.28 | 0.25 | -5.56 | 904  |
| 141 | 7.5 | 178 | 127 | -41 | 2.13 | 1.85 | 0.28 | 0.25 | -5.50 | 983  |
| 141 | 7.5 | 178 | 127 | -41 | 2.13 | 1.85 | 0.28 | 0.25 | -5.50 | 983  |
| 126 | 6.7 | 159 | 126 | -37 | 1.91 | 1.66 | 0.28 | 0.25 | -5.50 | 857  |
| 126 | 6.7 | 159 | 126 | -37 | 1.91 | 1.66 | 0.28 | 0.25 | -5.50 | 857  |
| 94  | 5.0 | 119 | 126 | -27 | 1.43 | 1.23 | 0.29 | 0.25 | -5.49 | 587  |
| 77  | 4.1 | 97  | 126 | -22 | 1.18 | 1.01 | 0.29 | 0.25 | -5.49 | 445  |
| 81  | 4.3 | 102 | 126 | -24 | 1.24 | 1.06 | 0.29 | 0.25 | -5.49 | 477  |
| 81  | 4.3 | 102 | 126 | -24 | 1.24 | 1.06 | 0.29 | 0.25 | -5.49 | 477  |
| 81  | 4.3 | 102 | 126 | -24 | 1.24 | 1.06 | 0.29 | 0.25 | -5.49 | 477  |
| 141 | 7.5 | 178 | 126 | -41 | 2.13 | 1.85 | 0.28 | 0.25 | -5.47 | 983  |
| 141 | 7.5 | 178 | 126 | -41 | 2.13 | 1.85 | 0.28 | 0.25 | -5.47 | 983  |
| 141 | 7.5 | 178 | 126 | -41 | 2.13 | 1.85 | 0.28 | 0.25 | -5.47 | 983  |
| 113 | 6   | 142 | 126 | -33 | 1.71 | 1.48 | 0.29 | 0.25 | -5.45 | 746  |
| 113 | 6.0 | 142 | 126 | -33 | 1.71 | 1.48 | 0.29 | 0.25 | -5.45 | 746  |
| 151 | 8   | 190 | 126 | -44 | 2.28 | 1.99 | 0.28 | 0.25 | -5.45 | 1062 |
| 151 | 8   | 190 | 126 | -44 | 2.28 | 1.99 | 0.28 | 0.25 | -5.45 | 1062 |
| 147 | 7.8 | 185 | 126 | -42 | 2.22 | 1.93 | 0.28 | 0.25 | -5.42 | 1031 |
| 113 | 6   | 142 | 126 | -32 | 1.71 | 1.48 | 0.29 | 0.25 | -5.42 | 746  |
| 151 | 8   | 190 | 126 | -43 | 2.28 | 1.99 | 0.28 | 0.25 | -5.40 | 1062 |

|     |     |     |     |     |      |      |      |      |       |      |
|-----|-----|-----|-----|-----|------|------|------|------|-------|------|
| 151 | 8   | 190 | 126 | -43 | 2.28 | 1.99 | 0.28 | 0.25 | -5.40 | 1062 |
| 151 | 8   | 190 | 126 | -43 | 2.28 | 1.99 | 0.28 | 0.25 | -5.40 | 1062 |
| 104 | 5.5 | 130 | 126 | -30 | 1.58 | 1.37 | 0.29 | 0.25 | -5.38 | 667  |
| 76  | 4   | 95  | 125 | -21 | 1.16 | 1.00 | 0.29 | 0.25 | -5.37 | 429  |
| 76  | 4   | 95  | 125 | -21 | 1.16 | 1.00 | 0.29 | 0.25 | -5.37 | 429  |
| 91  | 4.8 | 114 | 125 | -26 | 1.39 | 1.20 | 0.29 | 0.25 | -5.34 | 556  |
| 91  | 4.8 | 114 | 125 | -26 | 1.39 | 1.20 | 0.29 | 0.25 | -5.34 | 556  |
| 57  | 3   | 71  | 125 | -16 | 0.88 | 0.75 | 0.29 | 0.25 | -5.34 | 271  |
| 161 | 8.5 | 201 | 125 | -45 | 2.42 | 2.12 | 0.28 | 0.25 | -5.33 | 1142 |
| 161 | 8.5 | 201 | 125 | -45 | 2.42 | 2.12 | 0.28 | 0.25 | -5.33 | 1142 |
| 161 | 8.5 | 201 | 125 | -45 | 2.42 | 2.12 | 0.28 | 0.25 | -5.33 | 1142 |
| 129 | 6.8 | 161 | 125 | -36 | 1.95 | 1.70 | 0.29 | 0.25 | -5.29 | 872  |
| 171 | 9   | 213 | 125 | -47 | 2.57 | 2.25 | 0.29 | 0.25 | -5.27 | 1221 |
| 86  | 4.5 | 107 | 125 | -24 | 1.31 | 1.13 | 0.29 | 0.25 | -5.28 | 508  |
| 86  | 4.5 | 107 | 125 | -24 | 1.31 | 1.13 | 0.29 | 0.25 | -5.28 | 508  |
| 86  | 4.5 | 107 | 124 | -23 | 1.31 | 1.13 | 0.29 | 0.25 | -5.20 | 508  |
| 67  | 3.5 | 83  | 124 | -18 | 1.03 | 0.88 | 0.29 | 0.25 | -5.20 | 350  |
| 96  | 5   | 119 | 124 | -26 | 1.46 | 1.26 | 0.29 | 0.25 | -5.20 | 587  |
| 96  | 5   | 119 | 124 | -26 | 1.46 | 1.26 | 0.29 | 0.25 | -5.20 | 587  |
| 96  | 5   | 119 | 124 | -26 | 1.46 | 1.26 | 0.29 | 0.25 | -5.20 | 587  |
| 96  | 5   | 119 | 124 | -26 | 1.46 | 1.26 | 0.29 | 0.25 | -5.20 | 587  |
| 81  | 4.2 | 100 | 124 | -22 | 1.23 | 1.06 | 0.29 | 0.25 | -5.14 | 461  |
| 96  | 5   | 119 | 124 | -26 | 1.46 | 1.26 | 0.29 | 0.25 | -5.10 | 587  |
| 96  | 5.0 | 119 | 124 | -26 | 1.46 | 1.26 | 0.29 | 0.25 | -5.10 | 587  |
| 121 | 6.3 | 149 | 124 | -32 | 1.82 | 1.59 | 0.29 | 0.25 | -5.08 | 793  |
| 173 | 9   | 213 | 124 | -45 | 2.59 | 2.28 | 0.29 | 0.25 | -5.05 | 1221 |
| 121 | 6.3 | 149 | 123 | -32 | 1.82 | 1.59 | 0.29 | 0.25 | -5.03 | 793  |



|     |     |     |     |     |      |      |      |      |       |      |
|-----|-----|-----|-----|-----|------|------|------|------|-------|------|
| 81  | 4.2 | 100 | 123 | -21 | 1.23 | 1.06 | 0.29 | 0.25 | -5.03 | 461  |
| 106 | 5.5 | 130 | 123 | -28 | 1.60 | 1.39 | 0.29 | 0.25 | -5.03 | 667  |
| 131 | 6.8 | 161 | 123 | -34 | 1.97 | 1.72 | 0.29 | 0.25 | -5.02 | 872  |
| 131 | 6.8 | 161 | 123 | -34 | 1.97 | 1.72 | 0.29 | 0.25 | -5.02 | 872  |
| 131 | 6.8 | 161 | 123 | -34 | 1.97 | 1.72 | 0.29 | 0.25 | -5.00 | 872  |
| 141 | 7.3 | 173 | 123 | -36 | 2.12 | 1.85 | 0.29 | 0.25 | -4.97 | 952  |
| 116 | 6   | 142 | 123 | -30 | 1.75 | 1.52 | 0.29 | 0.25 | -4.96 | 746  |
| 151 | 7.8 | 185 | 123 | -39 | 2.26 | 1.99 | 0.29 | 0.25 | -4.94 | 1031 |
| 116 | 6   | 142 | 123 | -30 | 1.75 | 1.52 | 0.29 | 0.25 | -4.93 | 746  |
| 116 | 6   | 142 | 123 | -30 | 1.75 | 1.52 | 0.29 | 0.25 | -4.93 | 746  |
| 116 | 6   | 142 | 123 | -30 | 1.75 | 1.52 | 0.29 | 0.25 | -4.93 | 746  |
| 116 | 6   | 142 | 123 | -30 | 1.75 | 1.52 | 0.29 | 0.25 | -4.93 | 746  |
| 116 | 6   | 142 | 123 | -30 | 1.75 | 1.52 | 0.29 | 0.25 | -4.93 | 746  |
| 126 | 6.5 | 154 | 123 | -32 | 1.89 | 1.66 | 0.29 | 0.25 | -4.91 | 825  |
| 126 | 6.5 | 154 | 123 | -32 | 1.89 | 1.66 | 0.29 | 0.25 | -4.90 | 825  |
| 91  | 4.7 | 111 | 122 | -23 | 1.38 | 1.20 | 0.29 | 0.25 | -4.87 | 540  |
| 91  | 4.7 | 111 | 122 | -23 | 1.38 | 1.20 | 0.29 | 0.25 | -4.87 | 540  |
| 91  | 4.7 | 111 | 122 | -23 | 1.38 | 1.20 | 0.29 | 0.25 | -4.87 | 540  |
| 111 | 5.7 | 135 | 122 | -28 | 1.67 | 1.46 | 0.29 | 0.26 | -4.83 | 698  |
| 111 | 5.7 | 135 | 122 | -27 | 1.67 | 1.46 | 0.29 | 0.26 | -4.81 | 698  |
| 121 | 6.2 | 147 | 122 | -30 | 1.82 | 1.59 | 0.29 | 0.26 | -4.79 | 777  |
| 121 | 6.2 | 147 | 122 | -30 | 1.82 | 1.59 | 0.29 | 0.26 | -4.78 | 777  |
| 131 | 6.7 | 159 | 121 | -32 | 1.96 | 1.72 | 0.29 | 0.26 | -4.74 | 857  |
| 137 | 7   | 166 | 121 | -33 | 2.05 | 1.80 | 0.29 | 0.26 | -4.74 | 904  |
| 141 | 7.2 | 171 | 121 | -34 | 2.11 | 1.85 | 0.29 | 0.26 | -4.71 | 936  |
| 96  | 4.9 | 116 | 121 | -23 | 1.45 | 1.26 | 0.30 | 0.26 | -4.70 | 572  |
| 147 | 7.5 | 178 | 121 | -35 | 2.20 | 1.93 | 0.29 | 0.26 | -4.69 | 983  |

|     |     |     |     |     |      |      |      |      |       |      |
|-----|-----|-----|-----|-----|------|------|------|------|-------|------|
| 161 | 8.2 | 194 | 121 | -38 | 2.40 | 2.12 | 0.29 | 0.26 | -4.65 | 1094 |
| 79  | 4   | 95  | 121 | -19 | 1.20 | 1.04 | 0.30 | 0.26 | -4.63 | 429  |
| 79  | 4   | 95  | 121 | -19 | 1.20 | 1.04 | 0.30 | 0.26 | -4.63 | 429  |
| 99  | 5   | 119 | 121 | -23 | 1.49 | 1.30 | 0.30 | 0.26 | -4.62 | 587  |
| 138 | 7   | 166 | 121 | -32 | 2.06 | 1.81 | 0.29 | 0.26 | -4.60 | 904  |
| 79  | 4.0 | 95  | 120 | -18 | 1.20 | 1.04 | 0.30 | 0.26 | -4.58 | 429  |
| 89  | 4.5 | 107 | 120 | -20 | 1.34 | 1.17 | 0.30 | 0.26 | -4.55 | 508  |
| 91  | 4.6 | 109 | 120 | -21 | 1.37 | 1.20 | 0.30 | 0.26 | -4.54 | 524  |
| 91  | 4.6 | 109 | 120 | -21 | 1.37 | 1.20 | 0.30 | 0.26 | -4.54 | 524  |
| 91  | 4.6 | 109 | 120 | -21 | 1.37 | 1.20 | 0.30 | 0.26 | -4.54 | 524  |
| 121 | 6.1 | 145 | 120 | -28 | 1.81 | 1.59 | 0.30 | 0.26 | -4.54 | 762  |
| 107 | 5.4 | 128 | 120 | -24 | 1.60 | 1.41 | 0.30 | 0.26 | -4.50 | 651  |
| 119 | 6.0 | 142 | 120 | -27 | 1.78 | 1.56 | 0.30 | 0.26 | -4.47 | 746  |
| 119 | 6.0 | 142 | 120 | -27 | 1.78 | 1.56 | 0.30 | 0.26 | -4.47 | 746  |
| 119 | 6   | 142 | 120 | -27 | 1.78 | 1.56 | 0.30 | 0.26 | -4.44 | 746  |
| 109 | 5.5 | 130 | 120 | -24 | 1.63 | 1.43 | 0.30 | 0.26 | -4.43 | 667  |
| 151 | 7.6 | 180 | 120 | -34 | 2.25 | 1.99 | 0.30 | 0.26 | -4.43 | 999  |
| 80  | 4.0 | 95  | 119 | -17 | 1.21 | 1.05 | 0.30 | 0.26 | -4.34 | 429  |
| 136 | 6.8 | 161 | 119 | -29 | 2.02 | 1.79 | 0.30 | 0.26 | -4.30 | 872  |
| 126 | 6.3 | 149 | 119 | -27 | 1.88 | 1.66 | 0.30 | 0.26 | -4.26 | 793  |
| 161 | 8   | 190 | 118 | -34 | 2.39 | 2.12 | 0.30 | 0.26 | -4.23 | 1062 |
| 161 | 8   | 190 | 118 | -34 | 2.39 | 2.12 | 0.30 | 0.26 | -4.23 | 1062 |
| 161 | 8   | 190 | 118 | -34 | 2.39 | 2.12 | 0.30 | 0.26 | -4.23 | 1062 |
| 161 | 8   | 190 | 118 | -34 | 2.39 | 2.12 | 0.30 | 0.26 | -4.23 | 1062 |
| 161 | 8   | 190 | 118 | -34 | 2.39 | 2.12 | 0.30 | 0.26 | -4.23 | 1062 |
| 161 | 8   | 190 | 118 | -34 | 2.39 | 2.12 | 0.30 | 0.26 | -4.23 | 1062 |
| 101 | 5   | 119 | 118 | -21 | 1.51 | 1.33 | 0.30 | 0.27 | -4.23 | 587  |

|     |     |     |     |     |      |      |      |      |       |      |
|-----|-----|-----|-----|-----|------|------|------|------|-------|------|
| 101 | 5   | 119 | 118 | -21 | 1.51 | 1.33 | 0.30 | 0.27 | -4.23 | 587  |
| 101 | 5   | 119 | 118 | -21 | 1.51 | 1.33 | 0.30 | 0.27 | -4.23 | 587  |
| 101 | 5   | 119 | 118 | -21 | 1.51 | 1.33 | 0.30 | 0.27 | -4.23 | 587  |
| 101 | 5   | 119 | 118 | -21 | 1.51 | 1.33 | 0.30 | 0.27 | -4.23 | 587  |
| 101 | 5   | 119 | 118 | -21 | 1.51 | 1.33 | 0.30 | 0.27 | -4.23 | 587  |
| 101 | 5   | 119 | 118 | -21 | 1.51 | 1.33 | 0.30 | 0.27 | -4.23 | 587  |
| 101 | 5   | 119 | 118 | -21 | 1.51 | 1.33 | 0.30 | 0.27 | -4.23 | 587  |
| 101 | 5   | 119 | 118 | -21 | 1.51 | 1.33 | 0.30 | 0.27 | -4.23 | 587  |
| 151 | 7.5 | 178 | 118 | -32 | 2.24 | 1.99 | 0.30 | 0.26 | -4.20 | 983  |
| 171 | 8.5 | 201 | 118 | -36 | 2.53 | 2.25 | 0.30 | 0.26 | -4.18 | 1142 |
| 161 | 8   | 190 | 118 | -33 | 2.39 | 2.12 | 0.30 | 0.26 | -4.18 | 1062 |
| 161 | 8   | 190 | 118 | -33 | 2.39 | 2.12 | 0.30 | 0.26 | -4.18 | 1062 |
| 161 | 8   | 190 | 118 | -33 | 2.39 | 2.12 | 0.30 | 0.26 | -4.18 | 1062 |
| 161 | 8   | 190 | 118 | -33 | 2.39 | 2.12 | 0.30 | 0.26 | -4.18 | 1062 |
| 161 | 8   | 190 | 118 | -33 | 2.39 | 2.12 | 0.30 | 0.26 | -4.18 | 1062 |
| 141 | 7   | 166 | 118 | -29 | 2.09 | 1.85 | 0.30 | 0.26 | -4.18 | 904  |
| 141 | 7   | 166 | 118 | -29 | 2.09 | 1.85 | 0.30 | 0.26 | -4.18 | 904  |
| 141 | 7   | 166 | 118 | -29 | 2.09 | 1.85 | 0.30 | 0.26 | -4.18 | 904  |
| 141 | 7   | 166 | 118 | -29 | 2.09 | 1.85 | 0.30 | 0.26 | -4.18 | 904  |
| 91  | 4.5 | 107 | 118 | -19 | 1.36 | 1.20 | 0.30 | 0.27 | -4.19 | 508  |
| 91  | 4.5 | 107 | 118 | -19 | 1.36 | 1.20 | 0.30 | 0.27 | -4.19 | 508  |
| 91  | 4.5 | 107 | 118 | -19 | 1.36 | 1.20 | 0.30 | 0.27 | -4.19 | 508  |
| 91  | 4.5 | 107 | 118 | -19 | 1.36 | 1.20 | 0.30 | 0.27 | -4.19 | 508  |
| 91  | 4.5 | 107 | 118 | -19 | 1.36 | 1.20 | 0.30 | 0.27 | -4.19 | 508  |
| 91  | 4.5 | 107 | 118 | -19 | 1.36 | 1.20 | 0.30 | 0.27 | -4.19 | 508  |
| 91  | 4.5 | 107 | 118 | -19 | 1.36 | 1.20 | 0.30 | 0.27 | -4.19 | 508  |
| 91  | 4.5 | 107 | 118 | -19 | 1.36 | 1.20 | 0.30 | 0.27 | -4.19 | 508  |

|     |     |     |     |     |      |      |      |      |       |     |
|-----|-----|-----|-----|-----|------|------|------|------|-------|-----|
| 151 | 7.5 | 178 | 118 | -31 | 2.24 | 1.99 | 0.30 | 0.26 | -4.17 | 983 |
| 151 | 7.5 | 178 | 118 | -31 | 2.24 | 1.99 | 0.30 | 0.26 | -4.17 | 983 |
| 141 | 7   | 166 | 118 | -29 | 2.09 | 1.85 | 0.30 | 0.26 | -4.16 | 904 |
| 141 | 7   | 166 | 118 | -29 | 2.09 | 1.85 | 0.30 | 0.26 | -4.16 | 904 |
| 141 | 7   | 166 | 118 | -29 | 2.09 | 1.85 | 0.30 | 0.26 | -4.16 | 904 |
| 141 | 7   | 166 | 118 | -29 | 2.09 | 1.85 | 0.30 | 0.26 | -4.16 | 904 |
| 141 | 7.0 | 166 | 118 | -29 | 2.09 | 1.85 | 0.30 | 0.26 | -4.16 | 904 |
| 141 | 7.0 | 166 | 118 | -29 | 2.09 | 1.85 | 0.30 | 0.26 | -4.16 | 904 |
| 141 | 7.0 | 166 | 118 | -29 | 2.09 | 1.85 | 0.30 | 0.26 | -4.16 | 904 |
| 141 | 7.0 | 166 | 118 | -29 | 2.09 | 1.85 | 0.30 | 0.26 | -4.16 | 904 |
| 131 | 6.5 | 154 | 118 | -27 | 1.95 | 1.72 | 0.30 | 0.26 | -4.16 | 825 |
| 131 | 6.5 | 154 | 118 | -27 | 1.95 | 1.72 | 0.30 | 0.26 | -4.16 | 825 |
| 131 | 6.5 | 154 | 118 | -27 | 1.95 | 1.72 | 0.30 | 0.26 | -4.16 | 825 |
| 131 | 6.5 | 154 | 118 | -27 | 1.95 | 1.72 | 0.30 | 0.26 | -4.16 | 825 |
| 131 | 6.5 | 154 | 118 | -27 | 1.95 | 1.72 | 0.30 | 0.26 | -4.16 | 825 |
| 131 | 6.5 | 154 | 118 | -27 | 1.95 | 1.72 | 0.30 | 0.26 | -4.16 | 825 |
| 131 | 6.5 | 154 | 118 | -27 | 1.95 | 1.72 | 0.30 | 0.26 | -4.16 | 825 |
| 131 | 6.5 | 154 | 118 | -27 | 1.95 | 1.72 | 0.30 | 0.26 | -4.16 | 825 |
| 131 | 6.5 | 154 | 118 | -27 | 1.95 | 1.72 | 0.30 | 0.26 | -4.16 | 825 |
| 131 | 6.5 | 154 | 118 | -27 | 1.95 | 1.72 | 0.30 | 0.26 | -4.16 | 825 |
| 131 | 6.5 | 154 | 118 | -27 | 1.95 | 1.72 | 0.30 | 0.26 | -4.16 | 825 |
| 131 | 6.5 | 154 | 118 | -27 | 1.95 | 1.72 | 0.30 | 0.26 | -4.16 | 825 |
| 131 | 6.5 | 154 | 118 | -27 | 1.95 | 1.72 | 0.30 | 0.26 | -4.15 | 825 |
| 131 | 6.5 | 154 | 118 | -27 | 1.95 | 1.72 | 0.30 | 0.26 | -4.15 | 825 |
| 131 | 6.5 | 154 | 118 | -27 | 1.95 | 1.72 | 0.30 | 0.26 | -4.15 | 825 |
| 131 | 6.5 | 154 | 118 | -27 | 1.95 | 1.72 | 0.30 | 0.26 | -4.15 | 825 |
| 131 | 6.5 | 154 | 118 | -27 | 1.95 | 1.72 | 0.30 | 0.26 | -4.15 | 825 |

|     |     |     |     |     |      |      |      |      |       |     |
|-----|-----|-----|-----|-----|------|------|------|------|-------|-----|
| 131 | 6.5 | 154 | 118 | -27 | 1.95 | 1.72 | 0.30 | 0.26 | -4.15 | 825 |
| 131 | 6.5 | 154 | 118 | -27 | 1.95 | 1.72 | 0.30 | 0.26 | -4.15 | 825 |
| 131 | 6.5 | 154 | 118 | -27 | 1.95 | 1.72 | 0.30 | 0.26 | -4.15 | 825 |
| 131 | 6.5 | 154 | 118 | -27 | 1.95 | 1.72 | 0.30 | 0.26 | -4.15 | 825 |
| 121 | 6   | 142 | 118 | -25 | 1.80 | 1.59 | 0.30 | 0.27 | -4.15 | 746 |
| 121 | 6   | 142 | 118 | -25 | 1.80 | 1.59 | 0.30 | 0.27 | -4.15 | 746 |
| 121 | 6   | 142 | 118 | -25 | 1.80 | 1.59 | 0.30 | 0.27 | -4.15 | 746 |
| 121 | 6.0 | 142 | 118 | -25 | 1.80 | 1.59 | 0.30 | 0.27 | -4.15 | 746 |
| 121 | 6.0 | 142 | 118 | -25 | 1.80 | 1.59 | 0.30 | 0.27 | -4.15 | 746 |
| 121 | 6.0 | 142 | 118 | -25 | 1.80 | 1.59 | 0.30 | 0.27 | -4.15 | 746 |
| 121 | 6.0 | 142 | 118 | -25 | 1.80 | 1.59 | 0.30 | 0.27 | -4.15 | 746 |
| 121 | 6.0 | 142 | 118 | -25 | 1.80 | 1.59 | 0.30 | 0.27 | -4.15 | 746 |
| 121 | 6.0 | 142 | 118 | -25 | 1.80 | 1.59 | 0.30 | 0.27 | -4.15 | 746 |
| 121 | 6.0 | 142 | 118 | -25 | 1.80 | 1.59 | 0.30 | 0.27 | -4.15 | 746 |
| 113 | 5.6 | 133 | 118 | -23 | 1.69 | 1.48 | 0.30 | 0.27 | -4.14 | 682 |
| 111 | 5.5 | 130 | 118 | -23 | 1.66 | 1.46 | 0.30 | 0.27 | -4.14 | 667 |
| 111 | 5.5 | 130 | 118 | -23 | 1.66 | 1.46 | 0.30 | 0.27 | -4.14 | 667 |
| 111 | 5.5 | 130 | 118 | -23 | 1.66 | 1.46 | 0.30 | 0.27 | -4.14 | 667 |
| 111 | 5.5 | 130 | 118 | -23 | 1.66 | 1.46 | 0.30 | 0.27 | -4.14 | 667 |
| 111 | 5.5 | 130 | 118 | -23 | 1.66 | 1.46 | 0.30 | 0.27 | -4.14 | 667 |
| 111 | 5.5 | 130 | 118 | -23 | 1.66 | 1.46 | 0.30 | 0.27 | -4.14 | 667 |
| 111 | 5.5 | 130 | 118 | -23 | 1.66 | 1.46 | 0.30 | 0.27 | -4.14 | 667 |
| 81  | 4   | 95  | 118 | -17 | 1.22 | 1.06 | 0.30 | 0.27 | -4.15 | 429 |
| 81  | 4   | 95  | 118 | -17 | 1.22 | 1.06 | 0.30 | 0.27 | -4.15 | 429 |
| 81  | 4   | 95  | 118 | -17 | 1.22 | 1.06 | 0.30 | 0.27 | -4.15 | 429 |
| 105 | 5.2 | 123 | 118 | -21 | 1.57 | 1.38 | 0.30 | 0.27 | -4.13 | 619 |
| 101 | 5   | 119 | 118 | -21 | 1.51 | 1.33 | 0.30 | 0.27 | -4.13 | 587 |
| 101 | 5   | 119 | 118 | -21 | 1.51 | 1.33 | 0.30 | 0.27 | -4.13 | 587 |

|     |     |     |     |     |      |      |      |      |       |     |
|-----|-----|-----|-----|-----|------|------|------|------|-------|-----|
| 101 | 5   | 119 | 118 | -21 | 1.51 | 1.33 | 0.30 | 0.27 | -4.13 | 587 |
| 101 | 5   | 119 | 118 | -21 | 1.51 | 1.33 | 0.30 | 0.27 | -4.13 | 587 |
| 101 | 5   | 119 | 118 | -21 | 1.51 | 1.33 | 0.30 | 0.27 | -4.13 | 587 |
| 101 | 5   | 119 | 118 | -21 | 1.51 | 1.33 | 0.30 | 0.27 | -4.13 | 587 |
| 101 | 5   | 119 | 118 | -21 | 1.51 | 1.33 | 0.30 | 0.27 | -4.13 | 587 |
| 101 | 5.0 | 119 | 118 | -21 | 1.51 | 1.33 | 0.30 | 0.27 | -4.13 | 587 |
| 101 | 5.0 | 119 | 118 | -21 | 1.51 | 1.33 | 0.30 | 0.27 | -4.13 | 587 |
| 101 | 5.0 | 119 | 118 | -21 | 1.51 | 1.33 | 0.30 | 0.27 | -4.13 | 587 |
| 101 | 5.0 | 119 | 118 | -21 | 1.51 | 1.33 | 0.30 | 0.27 | -4.13 | 587 |
| 101 | 5.0 | 119 | 118 | -21 | 1.51 | 1.33 | 0.30 | 0.27 | -4.13 | 587 |
| 101 | 5.0 | 119 | 118 | -21 | 1.51 | 1.33 | 0.30 | 0.27 | -4.13 | 587 |
| 121 | 6   | 142 | 118 | -25 | 1.80 | 1.59 | 0.30 | 0.27 | -4.12 | 746 |
| 121 | 6   | 142 | 118 | -25 | 1.80 | 1.59 | 0.30 | 0.27 | -4.12 | 746 |
| 121 | 6   | 142 | 118 | -25 | 1.80 | 1.59 | 0.30 | 0.27 | -4.12 | 746 |
| 121 | 6   | 142 | 118 | -25 | 1.80 | 1.59 | 0.30 | 0.27 | -4.12 | 746 |
| 121 | 6   | 142 | 118 | -25 | 1.80 | 1.59 | 0.30 | 0.27 | -4.12 | 746 |
| 121 | 6   | 142 | 118 | -25 | 1.80 | 1.59 | 0.30 | 0.27 | -4.12 | 746 |
| 121 | 6   | 142 | 118 | -25 | 1.80 | 1.59 | 0.30 | 0.27 | -4.12 | 746 |
| 121 | 6   | 142 | 118 | -25 | 1.80 | 1.59 | 0.30 | 0.27 | -4.12 | 746 |
| 121 | 6   | 142 | 118 | -25 | 1.80 | 1.59 | 0.30 | 0.27 | -4.12 | 746 |
| 121 | 6   | 142 | 118 | -25 | 1.80 | 1.59 | 0.30 | 0.27 | -4.12 | 746 |
| 91  | 4.5 | 107 | 118 | -19 | 1.36 | 1.20 | 0.30 | 0.27 | -4.11 | 508 |
| 91  | 4.5 | 107 | 118 | -19 | 1.36 | 1.20 | 0.30 | 0.27 | -4.11 | 508 |
| 91  | 4.5 | 107 | 118 | -19 | 1.36 | 1.20 | 0.30 | 0.27 | -4.11 | 508 |
| 91  | 4.5 | 107 | 118 | -19 | 1.36 | 1.20 | 0.30 | 0.27 | -4.11 | 508 |
| 91  | 4.5 | 107 | 118 | -19 | 1.36 | 1.20 | 0.30 | 0.27 | -4.11 | 508 |
| 91  | 4.5 | 107 | 118 | -19 | 1.36 | 1.20 | 0.30 | 0.27 | -4.11 | 508 |

|     |     |     |     |     |      |      |      |      |       |     |
|-----|-----|-----|-----|-----|------|------|------|------|-------|-----|
| 91  | 4.5 | 107 | 118 | -19 | 1.36 | 1.20 | 0.30 | 0.27 | -4.11 | 508 |
| 81  | 4   | 95  | 117 | -16 | 1.22 | 1.06 | 0.30 | 0.27 | -4.10 | 429 |
| 81  | 4   | 95  | 117 | -16 | 1.22 | 1.06 | 0.30 | 0.27 | -4.10 | 429 |
| 81  | 4   | 95  | 117 | -16 | 1.22 | 1.06 | 0.30 | 0.27 | -4.10 | 429 |
| 81  | 4   | 95  | 117 | -16 | 1.22 | 1.06 | 0.30 | 0.27 | -4.10 | 429 |
| 111 | 5.5 | 130 | 117 | -22 | 1.66 | 1.46 | 0.30 | 0.27 | -4.08 | 667 |
| 111 | 5.5 | 130 | 117 | -22 | 1.66 | 1.46 | 0.30 | 0.27 | -4.08 | 667 |
| 111 | 5.5 | 130 | 117 | -22 | 1.66 | 1.46 | 0.30 | 0.27 | -4.08 | 667 |
| 111 | 5.5 | 130 | 117 | -22 | 1.66 | 1.46 | 0.30 | 0.27 | -4.08 | 667 |
| 111 | 5.5 | 130 | 117 | -22 | 1.66 | 1.46 | 0.30 | 0.27 | -4.08 | 667 |
| 111 | 5.5 | 130 | 117 | -22 | 1.66 | 1.46 | 0.30 | 0.27 | -4.08 | 667 |
| 111 | 5.5 | 130 | 117 | -22 | 1.66 | 1.46 | 0.30 | 0.27 | -4.08 | 667 |
| 111 | 5.5 | 130 | 117 | -22 | 1.66 | 1.46 | 0.30 | 0.27 | -4.08 | 667 |
| 111 | 5.5 | 130 | 117 | -22 | 1.66 | 1.46 | 0.30 | 0.27 | -4.08 | 667 |
| 111 | 5.5 | 130 | 117 | -22 | 1.66 | 1.46 | 0.30 | 0.27 | -4.08 | 667 |
| 111 | 5.5 | 130 | 117 | -22 | 1.66 | 1.46 | 0.30 | 0.27 | -4.08 | 667 |
| 111 | 5.5 | 130 | 117 | -22 | 1.66 | 1.46 | 0.30 | 0.27 | -4.08 | 667 |
| 111 | 5.5 | 130 | 117 | -22 | 1.66 | 1.46 | 0.30 | 0.27 | -4.08 | 667 |
| 71  | 3.5 | 83  | 117 | -14 | 1.07 | 0.93 | 0.31 | 0.27 | -4.09 | 350 |
| 71  | 3.5 | 83  | 117 | -14 | 1.07 | 0.93 | 0.31 | 0.27 | -4.09 | 350 |
| 71  | 3.5 | 83  | 117 | -14 | 1.07 | 0.93 | 0.31 | 0.27 | -4.09 | 350 |
| 71  | 3.5 | 83  | 117 | -14 | 1.07 | 0.93 | 0.31 | 0.27 | -4.09 | 350 |
| 71  | 3.5 | 83  | 117 | -14 | 1.07 | 0.93 | 0.31 | 0.27 | -4.09 | 350 |
| 71  | 3.5 | 83  | 117 | -14 | 1.07 | 0.93 | 0.31 | 0.27 | -4.07 | 350 |
| 71  | 3.5 | 83  | 117 | -14 | 1.07 | 0.93 | 0.31 | 0.27 | -4.07 | 350 |
| 71  | 3.5 | 83  | 117 | -14 | 1.07 | 0.93 | 0.31 | 0.27 | -4.07 | 350 |
| 71  | 3.5 | 83  | 117 | -14 | 1.07 | 0.93 | 0.31 | 0.27 | -4.07 | 350 |

|     |     |     |     |     |      |      |      |      |       |      |
|-----|-----|-----|-----|-----|------|------|------|------|-------|------|
| 71  | 3.5 | 83  | 117 | -14 | 1.07 | 0.93 | 0.31 | 0.27 | -4.07 | 350  |
| 71  | 3.5 | 83  | 117 | -14 | 1.07 | 0.93 | 0.31 | 0.27 | -4.07 | 350  |
| 61  | 3   | 71  | 117 | -12 | 0.93 | 0.80 | 0.31 | 0.27 | -4.01 | 271  |
| 61  | 3   | 71  | 117 | -12 | 0.93 | 0.80 | 0.31 | 0.27 | -4.01 | 271  |
| 116 | 5.7 | 135 | 117 | -23 | 1.73 | 1.52 | 0.30 | 0.27 | -3.96 | 698  |
| 153 | 7.5 | 178 | 117 | -30 | 2.26 | 2.01 | 0.30 | 0.27 | -3.94 | 983  |
| 131 | 6.4 | 152 | 116 | -25 | 1.94 | 1.72 | 0.30 | 0.27 | -3.90 | 809  |
| 103 | 5   | 119 | 116 | -19 | 1.53 | 1.35 | 0.31 | 0.27 | -3.84 | 587  |
| 103 | 5   | 119 | 116 | -19 | 1.53 | 1.35 | 0.31 | 0.27 | -3.84 | 587  |
| 121 | 5.9 | 140 | 116 | -23 | 1.79 | 1.59 | 0.30 | 0.27 | -3.82 | 730  |
| 121 | 5.9 | 140 | 116 | -23 | 1.79 | 1.59 | 0.30 | 0.27 | -3.82 | 730  |
| 113 | 5.5 | 130 | 116 | -21 | 1.68 | 1.48 | 0.31 | 0.27 | -3.78 | 667  |
| 103 | 5   | 119 | 115 | -19 | 1.53 | 1.35 | 0.31 | 0.27 | -3.74 | 587  |
| 103 | 5.0 | 119 | 115 | -19 | 1.53 | 1.35 | 0.31 | 0.27 | -3.74 | 587  |
| 113 | 5.5 | 130 | 115 | -20 | 1.68 | 1.48 | 0.31 | 0.27 | -3.72 | 667  |
| 136 | 6.6 | 156 | 115 | -25 | 2.01 | 1.79 | 0.30 | 0.27 | -3.71 | 841  |
| 93  | 4.5 | 107 | 115 | -17 | 1.39 | 1.22 | 0.31 | 0.27 | -3.68 | 508  |
| 116 | 5.6 | 133 | 115 | -21 | 1.72 | 1.52 | 0.31 | 0.27 | -3.67 | 682  |
| 151 | 7.3 | 173 | 115 | -27 | 2.23 | 1.99 | 0.30 | 0.27 | -3.63 | 952  |
| 176 | 8.5 | 201 | 115 | -31 | 2.59 | 2.32 | 0.30 | 0.27 | -3.61 | 1142 |
| 141 | 6.8 | 161 | 114 | -24 | 2.08 | 1.85 | 0.31 | 0.27 | -3.56 | 872  |
| 141 | 6.8 | 161 | 114 | -24 | 2.08 | 1.85 | 0.31 | 0.27 | -3.56 | 872  |
| 135 | 6.5 | 154 | 114 | -23 | 1.99 | 1.77 | 0.31 | 0.27 | -3.56 | 825  |
| 156 | 7.5 | 178 | 114 | -27 | 2.30 | 2.05 | 0.31 | 0.27 | -3.55 | 983  |
| 131 | 6.3 | 149 | 114 | -22 | 1.93 | 1.72 | 0.31 | 0.27 | -3.53 | 793  |
| 73  | 3.5 | 83  | 114 | -12 | 1.09 | 0.96 | 0.31 | 0.27 | -3.53 | 350  |
| 156 | 7.5 | 178 | 114 | -26 | 2.30 | 2.05 | 0.31 | 0.27 | -3.52 | 983  |



|     |     |     |     |     |      |      |      |      |       |      |
|-----|-----|-----|-----|-----|------|------|------|------|-------|------|
| 156 | 7.5 | 178 | 114 | -26 | 2.30 | 2.05 | 0.31 | 0.27 | -3.52 | 983  |
| 146 | 7   | 166 | 114 | -24 | 2.15 | 1.92 | 0.31 | 0.27 | -3.48 | 904  |
| 146 | 7   | 166 | 114 | -24 | 2.15 | 1.92 | 0.31 | 0.27 | -3.47 | 904  |
| 69  | 3.3 | 78  | 114 | -11 | 1.04 | 0.91 | 0.31 | 0.27 | -3.47 | 318  |
| 171 | 8.2 | 194 | 114 | -28 | 2.51 | 2.25 | 0.31 | 0.27 | -3.42 | 1094 |
| 157 | 7.5 | 178 | 114 | -26 | 2.31 | 2.06 | 0.31 | 0.28 | -3.42 | 983  |
| 157 | 7.5 | 178 | 114 | -26 | 2.31 | 2.06 | 0.31 | 0.28 | -3.42 | 983  |
| 113 | 5.4 | 128 | 114 | -18 | 1.67 | 1.48 | 0.31 | 0.27 | -3.42 | 651  |
| 136 | 6.5 | 154 | 114 | -22 | 2.00 | 1.79 | 0.31 | 0.28 | -3.41 | 825  |
| 136 | 6.5 | 154 | 114 | -22 | 2.00 | 1.79 | 0.31 | 0.28 | -3.41 | 825  |
| 136 | 6.5 | 154 | 114 | -22 | 2.00 | 1.79 | 0.31 | 0.28 | -3.41 | 825  |
| 121 | 5.8 | 137 | 114 | -20 | 1.79 | 1.59 | 0.31 | 0.27 | -3.39 | 714  |
| 101 | 4.8 | 114 | 113 | -16 | 1.50 | 1.33 | 0.31 | 0.28 | -3.36 | 556  |
| 126 | 6.0 | 142 | 113 | -20 | 1.86 | 1.66 | 0.31 | 0.28 | -3.34 | 746  |
| 147 | 7   | 166 | 113 | -23 | 2.16 | 1.93 | 0.31 | 0.28 | -3.33 | 904  |
| 147 | 7.0 | 166 | 113 | -23 | 2.16 | 1.93 | 0.31 | 0.28 | -3.33 | 904  |
| 141 | 6.7 | 159 | 113 | -22 | 2.07 | 1.85 | 0.31 | 0.28 | -3.32 | 857  |
| 101 | 4.8 | 114 | 113 | -16 | 1.50 | 1.33 | 0.31 | 0.28 | -3.31 | 556  |
| 101 | 4.8 | 114 | 113 | -16 | 1.50 | 1.33 | 0.31 | 0.28 | -3.31 | 556  |
| 126 | 6   | 142 | 113 | -20 | 1.86 | 1.66 | 0.31 | 0.28 | -3.30 | 746  |
| 126 | 6   | 142 | 113 | -20 | 1.86 | 1.66 | 0.31 | 0.28 | -3.30 | 746  |
| 139 | 6.6 | 156 | 113 | -22 | 2.04 | 1.83 | 0.31 | 0.28 | -3.27 | 841  |
| 106 | 5   | 119 | 113 | -16 | 1.57 | 1.39 | 0.31 | 0.28 | -3.25 | 587  |
| 91  | 4.3 | 102 | 112 | -14 | 1.35 | 1.20 | 0.31 | 0.28 | -3.22 | 477  |
| 91  | 4.3 | 102 | 112 | -14 | 1.35 | 1.20 | 0.31 | 0.28 | -3.22 | 477  |
| 91  | 4.3 | 102 | 112 | -14 | 1.35 | 1.20 | 0.31 | 0.28 | -3.20 | 477  |
| 91  | 4.3 | 102 | 112 | -14 | 1.35 | 1.20 | 0.31 | 0.28 | -3.20 | 477  |

|     |     |     |     |     |      |      |      |      |       |      |
|-----|-----|-----|-----|-----|------|------|------|------|-------|------|
| 91  | 4.3 | 102 | 112 | -14 | 1.35 | 1.20 | 0.31 | 0.28 | -3.20 | 477  |
| 127 | 6   | 142 | 112 | -19 | 1.87 | 1.67 | 0.31 | 0.28 | -3.14 | 746  |
| 121 | 5.7 | 135 | 112 | -18 | 1.78 | 1.59 | 0.31 | 0.28 | -3.12 | 698  |
| 191 | 9.0 | 213 | 112 | -28 | 2.79 | 2.51 | 0.31 | 0.28 | -3.10 | 1221 |
| 121 | 5.7 | 135 | 112 | -18 | 1.78 | 1.59 | 0.31 | 0.28 | -3.10 | 698  |
| 138 | 6.5 | 154 | 112 | -20 | 2.03 | 1.81 | 0.31 | 0.28 | -3.10 | 825  |
| 96  | 4.5 | 107 | 112 | -14 | 1.42 | 1.26 | 0.32 | 0.28 | -3.11 | 508  |
| 96  | 4.5 | 107 | 112 | -14 | 1.42 | 1.26 | 0.32 | 0.28 | -3.11 | 508  |
| 147 | 6.9 | 164 | 112 | -21 | 2.15 | 1.93 | 0.31 | 0.28 | -3.10 | 888  |
| 107 | 5   | 119 | 112 | -15 | 1.58 | 1.41 | 0.32 | 0.28 | -3.06 | 587  |
| 107 | 5   | 119 | 112 | -15 | 1.58 | 1.41 | 0.32 | 0.28 | -3.06 | 587  |
| 181 | 8.5 | 201 | 111 | -26 | 2.64 | 2.38 | 0.31 | 0.28 | -3.03 | 1142 |
| 147 | 6.9 | 164 | 111 | -21 | 2.15 | 1.93 | 0.31 | 0.28 | -3.03 | 888  |
| 126 | 5.9 | 140 | 111 | -18 | 1.85 | 1.66 | 0.31 | 0.28 | -3.02 | 730  |
| 128 | 6.0 | 142 | 111 | -18 | 1.88 | 1.68 | 0.31 | 0.28 | -3.01 | 746  |
| 171 | 8   | 190 | 111 | -24 | 2.50 | 2.25 | 0.31 | 0.28 | -3.01 | 1062 |
| 171 | 8   | 190 | 111 | -24 | 2.50 | 2.25 | 0.31 | 0.28 | -3.01 | 1062 |
| 111 | 5.2 | 123 | 111 | -15 | 1.63 | 1.46 | 0.31 | 0.28 | -2.96 | 619  |
| 111 | 5.2 | 123 | 111 | -15 | 1.63 | 1.46 | 0.31 | 0.28 | -2.96 | 619  |
| 171 | 8   | 190 | 111 | -24 | 2.50 | 2.25 | 0.31 | 0.28 | -2.96 | 1062 |
| 171 | 8   | 190 | 111 | -24 | 2.50 | 2.25 | 0.31 | 0.28 | -2.96 | 1062 |
| 171 | 8.0 | 190 | 111 | -24 | 2.50 | 2.25 | 0.31 | 0.28 | -2.96 | 1062 |
| 103 | 4.8 | 114 | 111 | -14 | 1.52 | 1.35 | 0.32 | 0.28 | -2.95 | 556  |
| 86  | 4   | 95  | 111 | -12 | 1.27 | 1.13 | 0.32 | 0.28 | -2.93 | 429  |
| 161 | 7.5 | 178 | 111 | -22 | 2.35 | 2.12 | 0.31 | 0.28 | -2.90 | 983  |
| 161 | 7.5 | 178 | 111 | -22 | 2.35 | 2.12 | 0.31 | 0.28 | -2.90 | 983  |
| 161 | 7.5 | 178 | 111 | -22 | 2.35 | 2.12 | 0.31 | 0.28 | -2.90 | 983  |

|     |     |     |     |     |      |      |      |      |       |     |
|-----|-----|-----|-----|-----|------|------|------|------|-------|-----|
| 161 | 7.5 | 178 | 111 | -22 | 2.35 | 2.12 | 0.31 | 0.28 | -2.90 | 983 |
| 161 | 7.5 | 178 | 111 | -22 | 2.35 | 2.12 | 0.31 | 0.28 | -2.90 | 983 |
| 161 | 7.5 | 178 | 111 | -22 | 2.35 | 2.12 | 0.31 | 0.28 | -2.90 | 983 |
| 163 | 7.6 | 180 | 111 | -22 | 2.38 | 2.14 | 0.31 | 0.28 | -2.87 | 999 |
| 101 | 4.7 | 111 | 111 | -14 | 1.49 | 1.33 | 0.32 | 0.28 | -2.87 | 540 |
| 161 | 7.5 | 178 | 111 | -22 | 2.35 | 2.12 | 0.31 | 0.28 | -2.87 | 983 |
| 161 | 7.5 | 178 | 111 | -22 | 2.35 | 2.12 | 0.31 | 0.28 | -2.87 | 983 |
| 161 | 7.5 | 178 | 111 | -22 | 2.35 | 2.12 | 0.31 | 0.28 | -2.87 | 983 |
| 146 | 6.8 | 161 | 111 | -19 | 2.13 | 1.92 | 0.31 | 0.28 | -2.85 | 872 |
| 69  | 3.2 | 76  | 110 | -9  | 1.03 | 0.91 | 0.32 | 0.28 | -2.84 | 302 |
| 129 | 6   | 142 | 110 | -17 | 1.89 | 1.70 | 0.32 | 0.28 | -2.81 | 746 |
| 91  | 4.2 | 100 | 110 | -12 | 1.34 | 1.20 | 0.32 | 0.28 | -2.82 | 461 |
| 91  | 4.2 | 100 | 110 | -12 | 1.34 | 1.20 | 0.32 | 0.28 | -2.82 | 461 |
| 91  | 4.2 | 100 | 110 | -12 | 1.34 | 1.20 | 0.32 | 0.28 | -2.82 | 461 |
| 151 | 7   | 166 | 110 | -19 | 2.20 | 1.99 | 0.31 | 0.28 | -2.78 | 904 |
| 151 | 7   | 166 | 110 | -19 | 2.20 | 1.99 | 0.31 | 0.28 | -2.78 | 904 |
| 151 | 7   | 166 | 110 | -19 | 2.20 | 1.99 | 0.31 | 0.28 | -2.78 | 904 |
| 151 | 7   | 166 | 110 | -19 | 2.20 | 1.99 | 0.31 | 0.28 | -2.78 | 904 |
| 151 | 7   | 166 | 110 | -19 | 2.20 | 1.99 | 0.31 | 0.28 | -2.78 | 904 |
| 151 | 7   | 166 | 110 | -19 | 2.20 | 1.99 | 0.31 | 0.28 | -2.78 | 904 |
| 151 | 7   | 166 | 110 | -19 | 2.20 | 1.99 | 0.31 | 0.28 | -2.77 | 904 |
| 151 | 7   | 166 | 110 | -19 | 2.20 | 1.99 | 0.31 | 0.28 | -2.77 | 904 |
| 151 | 7   | 166 | 110 | -19 | 2.20 | 1.99 | 0.31 | 0.28 | -2.77 | 904 |
| 151 | 7   | 166 | 110 | -19 | 2.20 | 1.99 | 0.31 | 0.28 | -2.77 | 904 |
| 151 | 7   | 166 | 110 | -19 | 2.20 | 1.99 | 0.31 | 0.28 | -2.77 | 904 |
| 151 | 7.0 | 166 | 110 | -19 | 2.20 | 1.99 | 0.31 | 0.28 | -2.77 | 904 |
| 151 | 7.0 | 166 | 110 | -19 | 2.20 | 1.99 | 0.31 | 0.28 | -2.77 | 904 |

|     |     |     |     |     |      |      |      |      |       |      |
|-----|-----|-----|-----|-----|------|------|------|------|-------|------|
| 162 | 7.5 | 178 | 110 | -21 | 2.36 | 2.13 | 0.31 | 0.28 | -2.74 | 983  |
| 147 | 6.8 | 161 | 110 | -18 | 2.15 | 1.93 | 0.32 | 0.28 | -2.70 | 872  |
| 141 | 6.5 | 154 | 109 | -17 | 2.06 | 1.85 | 0.32 | 0.29 | -2.66 | 825  |
| 141 | 6.5 | 154 | 109 | -17 | 2.06 | 1.85 | 0.32 | 0.29 | -2.66 | 825  |
| 141 | 6.5 | 154 | 109 | -17 | 2.06 | 1.85 | 0.32 | 0.29 | -2.66 | 825  |
| 141 | 6.5 | 154 | 109 | -17 | 2.06 | 1.85 | 0.32 | 0.29 | -2.66 | 825  |
| 141 | 6.5 | 154 | 109 | -17 | 2.06 | 1.85 | 0.32 | 0.29 | -2.66 | 825  |
| 141 | 6.5 | 154 | 109 | -17 | 2.06 | 1.85 | 0.32 | 0.29 | -2.66 | 825  |
| 141 | 6.5 | 154 | 109 | -17 | 2.06 | 1.85 | 0.32 | 0.29 | -2.65 | 825  |
| 191 | 8.8 | 209 | 109 | -23 | 2.77 | 2.51 | 0.32 | 0.29 | -2.63 | 1189 |
| 146 | 6.7 | 159 | 109 | -17 | 2.13 | 1.92 | 0.32 | 0.29 | -2.59 | 857  |
| 148 | 6.8 | 161 | 109 | -17 | 2.16 | 1.95 | 0.32 | 0.29 | -2.56 | 872  |
| 126 | 5.8 | 137 | 109 | -15 | 1.84 | 1.66 | 0.32 | 0.29 | -2.55 | 714  |
| 126 | 5.8 | 137 | 109 | -15 | 1.84 | 1.66 | 0.32 | 0.29 | -2.55 | 714  |
| 146 | 6.7 | 159 | 109 | -17 | 2.13 | 1.92 | 0.32 | 0.29 | -2.56 | 857  |
| 131 | 6   | 142 | 109 | -15 | 1.91 | 1.72 | 0.32 | 0.29 | -2.52 | 746  |
| 131 | 6   | 142 | 109 | -15 | 1.91 | 1.72 | 0.32 | 0.29 | -2.52 | 746  |
| 131 | 6   | 142 | 109 | -15 | 1.91 | 1.72 | 0.32 | 0.29 | -2.52 | 746  |
| 131 | 6   | 142 | 109 | -15 | 1.91 | 1.72 | 0.32 | 0.29 | -2.52 | 746  |
| 131 | 6   | 142 | 109 | -15 | 1.91 | 1.72 | 0.32 | 0.29 | -2.52 | 746  |
| 131 | 6   | 142 | 109 | -15 | 1.91 | 1.72 | 0.32 | 0.29 | -2.52 | 746  |
| 131 | 6   | 142 | 109 | -15 | 1.91 | 1.72 | 0.32 | 0.29 | -2.52 | 746  |
| 131 | 6   | 142 | 109 | -15 | 1.91 | 1.72 | 0.32 | 0.29 | -2.52 | 746  |
| 131 | 6   | 142 | 109 | -15 | 1.91 | 1.72 | 0.32 | 0.29 | -2.52 | 746  |
| 131 | 6   | 142 | 109 | -15 | 1.91 | 1.72 | 0.32 | 0.29 | -2.52 | 746  |
| 131 | 6   | 142 | 109 | -15 | 1.91 | 1.72 | 0.32 | 0.29 | -2.52 | 746  |
| 131 | 6   | 142 | 109 | -15 | 1.91 | 1.72 | 0.32 | 0.29 | -2.52 | 746  |
| 131 | 6   | 142 | 109 | -15 | 1.91 | 1.72 | 0.32 | 0.29 | -2.52 | 746  |
| 131 | 6   | 142 | 109 | -15 | 1.91 | 1.72 | 0.32 | 0.29 | -2.52 | 746  |
| 131 | 6   | 142 | 109 | -15 | 1.91 | 1.72 | 0.32 | 0.29 | -2.52 | 746  |



[illegible]

|     |     |     |     |     |      |      |      |      |       |      |
|-----|-----|-----|-----|-----|------|------|------|------|-------|------|
| 131 | 6   | 142 | 109 | -15 | 1.91 | 1.72 | 0.32 | 0.29 | -2.49 | 746  |
| 131 | 6   | 142 | 109 | -15 | 1.91 | 1.72 | 0.32 | 0.29 | -2.49 | 746  |
| 186 | 8.5 | 201 | 108 | -21 | 2.70 | 2.45 | 0.32 | 0.29 | -2.46 | 1142 |
| 66  | 3   | 71  | 108 | -7  | 0.98 | 0.87 | 0.33 | 0.29 | -2.38 | 271  |
| 121 | 5.5 | 130 | 108 | -13 | 1.77 | 1.59 | 0.32 | 0.29 | -2.36 | 667  |
| 165 | 7.5 | 178 | 108 | -18 | 2.39 | 2.17 | 0.32 | 0.29 | -2.35 | 983  |
| 143 | 6.5 | 154 | 108 | -15 | 2.08 | 1.88 | 0.32 | 0.29 | -2.35 | 825  |
| 106 | 4.8 | 114 | 108 | -11 | 1.55 | 1.39 | 0.32 | 0.29 | -2.34 | 556  |
| 106 | 4.8 | 114 | 108 | -11 | 1.55 | 1.39 | 0.32 | 0.29 | -2.34 | 556  |
| 121 | 5.5 | 130 | 108 | -13 | 1.77 | 1.59 | 0.32 | 0.29 | -2.30 | 667  |
| 121 | 5.5 | 130 | 108 | -13 | 1.77 | 1.59 | 0.32 | 0.29 | -2.30 | 667  |
| 121 | 5.5 | 130 | 108 | -13 | 1.77 | 1.59 | 0.32 | 0.29 | -2.30 | 667  |
| 121 | 5.5 | 130 | 108 | -13 | 1.77 | 1.59 | 0.32 | 0.29 | -2.30 | 667  |
| 121 | 5.5 | 130 | 108 | -13 | 1.77 | 1.59 | 0.32 | 0.29 | -2.30 | 667  |
| 121 | 5.5 | 130 | 108 | -13 | 1.77 | 1.59 | 0.32 | 0.29 | -2.30 | 667  |
| 121 | 5.5 | 130 | 108 | -13 | 1.77 | 1.59 | 0.32 | 0.29 | -2.30 | 667  |
| 121 | 5.5 | 130 | 108 | -13 | 1.77 | 1.59 | 0.32 | 0.29 | -2.30 | 667  |
| 121 | 5.5 | 130 | 108 | -13 | 1.77 | 1.59 | 0.32 | 0.29 | -2.30 | 667  |
| 121 | 5.5 | 130 | 108 | -13 | 1.77 | 1.59 | 0.32 | 0.29 | -2.30 | 667  |
| 121 | 5.5 | 130 | 108 | -13 | 1.77 | 1.59 | 0.32 | 0.29 | -2.30 | 667  |
| 135 | 6.1 | 145 | 108 | -14 | 1.96 | 1.77 | 0.32 | 0.29 | -2.30 | 762  |
| 111 | 5   | 119 | 107 | -11 | 1.62 | 1.46 | 0.32 | 0.29 | -2.28 | 587  |
| 111 | 5   | 119 | 107 | -11 | 1.62 | 1.46 | 0.32 | 0.29 | -2.28 | 587  |
| 111 | 5   | 119 | 107 | -11 | 1.62 | 1.46 | 0.32 | 0.29 | -2.28 | 587  |
| 111 | 5   | 119 | 107 | -11 | 1.62 | 1.46 | 0.32 | 0.29 | -2.28 | 587  |
| 111 | 5   | 119 | 107 | -11 | 1.62 | 1.46 | 0.32 | 0.29 | -2.28 | 587  |
| 111 | 5   | 119 | 107 | -11 | 1.62 | 1.46 | 0.32 | 0.29 | -2.28 | 587  |
| 111 | 5   | 119 | 107 | -11 | 1.62 | 1.46 | 0.32 | 0.29 | -2.28 | 587  |

|     |     |     |     |     |      |      |      |      |       |     |
|-----|-----|-----|-----|-----|------|------|------|------|-------|-----|
| 111 | 5   | 119 | 107 | -11 | 1.62 | 1.46 | 0.32 | 0.29 | -2.28 | 587 |
| 111 | 5   | 119 | 107 | -11 | 1.62 | 1.46 | 0.32 | 0.29 | -2.28 | 587 |
| 111 | 5   | 119 | 107 | -11 | 1.62 | 1.46 | 0.32 | 0.29 | -2.28 | 587 |
| 111 | 5   | 119 | 107 | -11 | 1.62 | 1.46 | 0.32 | 0.29 | -2.28 | 587 |
| 111 | 5   | 119 | 107 | -11 | 1.62 | 1.46 | 0.32 | 0.29 | -2.28 | 587 |
| 111 | 5   | 119 | 107 | -11 | 1.62 | 1.46 | 0.32 | 0.29 | -2.28 | 587 |
| 111 | 5   | 119 | 107 | -11 | 1.62 | 1.46 | 0.32 | 0.29 | -2.28 | 587 |
| 111 | 5   | 119 | 107 | -11 | 1.62 | 1.46 | 0.32 | 0.29 | -2.28 | 587 |
| 111 | 5   | 119 | 107 | -11 | 1.62 | 1.46 | 0.32 | 0.29 | -2.28 | 587 |
| 111 | 5   | 119 | 107 | -11 | 1.62 | 1.46 | 0.32 | 0.29 | -2.28 | 587 |
| 111 | 5   | 119 | 107 | -11 | 1.62 | 1.46 | 0.32 | 0.29 | -2.28 | 587 |
| 111 | 5   | 119 | 107 | -11 | 1.62 | 1.46 | 0.32 | 0.29 | -2.28 | 587 |
| 111 | 5   | 119 | 107 | -11 | 1.62 | 1.46 | 0.32 | 0.29 | -2.28 | 587 |
| 111 | 5   | 119 | 107 | -11 | 1.62 | 1.46 | 0.32 | 0.29 | -2.28 | 587 |
| 126 | 5.7 | 135 | 107 | -13 | 1.84 | 1.66 | 0.32 | 0.29 | -2.26 | 698 |
| 133 | 6   | 142 | 107 | -13 | 1.93 | 1.75 | 0.32 | 0.29 | -2.20 | 746 |
| 91  | 4.1 | 97  | 107 | -9  | 1.34 | 1.20 | 0.33 | 0.29 | -2.20 | 445 |
| 146 | 6.6 | 156 | 107 | -14 | 2.12 | 1.92 | 0.32 | 0.29 | -2.17 | 841 |
| 111 | 5   | 119 | 107 | -11 | 1.62 | 1.46 | 0.32 | 0.29 | -2.18 | 587 |
| 111 | 5   | 119 | 107 | -11 | 1.62 | 1.46 | 0.32 | 0.29 | -2.18 | 587 |
| 111 | 5   | 119 | 107 | -11 | 1.62 | 1.46 | 0.32 | 0.29 | -2.18 | 587 |
| 111 | 5   | 119 | 107 | -11 | 1.62 | 1.46 | 0.32 | 0.29 | -2.18 | 587 |
| 111 | 5   | 119 | 107 | -11 | 1.62 | 1.46 | 0.32 | 0.29 | -2.18 | 587 |
| 111 | 5   | 119 | 107 | -11 | 1.62 | 1.46 | 0.32 | 0.29 | -2.18 | 587 |
| 111 | 5   | 119 | 107 | -11 | 1.62 | 1.46 | 0.32 | 0.29 | -2.18 | 587 |
| 111 | 5   | 119 | 107 | -11 | 1.62 | 1.46 | 0.32 | 0.29 | -2.18 | 587 |
| 111 | 5   | 119 | 107 | -11 | 1.62 | 1.46 | 0.32 | 0.29 | -2.18 | 587 |
| 111 | 5   | 119 | 107 | -11 | 1.62 | 1.46 | 0.32 | 0.29 | -2.18 | 587 |



|     |     |     |     |     |      |      |      |      |       |      |
|-----|-----|-----|-----|-----|------|------|------|------|-------|------|
| 111 | 5   | 119 | 107 | -11 | 1.62 | 1.46 | 0.32 | 0.29 | -2.18 | 587  |
| 111 | 5   | 119 | 107 | -11 | 1.62 | 1.46 | 0.32 | 0.29 | -2.18 | 587  |
| 111 | 5   | 119 | 107 | -11 | 1.62 | 1.46 | 0.32 | 0.29 | -2.18 | 587  |
| 111 | 5   | 119 | 107 | -11 | 1.62 | 1.46 | 0.32 | 0.29 | -2.18 | 587  |
| 111 | 5.0 | 119 | 107 | -11 | 1.62 | 1.46 | 0.32 | 0.29 | -2.18 | 587  |
| 111 | 5.0 | 119 | 107 | -11 | 1.62 | 1.46 | 0.32 | 0.29 | -2.18 | 587  |
| 111 | 5.0 | 119 | 107 | -11 | 1.62 | 1.46 | 0.32 | 0.29 | -2.18 | 587  |
| 111 | 5.0 | 119 | 107 | -11 | 1.62 | 1.46 | 0.32 | 0.29 | -2.18 | 587  |
| 111 | 5.0 | 119 | 107 | -11 | 1.62 | 1.46 | 0.32 | 0.29 | -2.18 | 587  |
| 111 | 5.0 | 119 | 107 | -11 | 1.62 | 1.46 | 0.32 | 0.29 | -2.18 | 587  |
| 111 | 5.0 | 119 | 107 | -11 | 1.62 | 1.46 | 0.32 | 0.29 | -2.18 | 587  |
| 111 | 5.0 | 119 | 107 | -11 | 1.62 | 1.46 | 0.32 | 0.29 | -2.18 | 587  |
| 111 | 5.0 | 119 | 107 | -11 | 1.62 | 1.46 | 0.32 | 0.29 | -2.18 | 587  |
| 111 | 5.0 | 119 | 107 | -11 | 1.62 | 1.46 | 0.32 | 0.29 | -2.18 | 587  |
| 111 | 5.0 | 119 | 107 | -11 | 1.62 | 1.46 | 0.32 | 0.29 | -2.18 | 587  |
| 151 | 6.8 | 161 | 107 | -15 | 2.19 | 1.99 | 0.32 | 0.29 | -2.15 | 872  |
| 151 | 6.8 | 161 | 107 | -15 | 2.19 | 1.99 | 0.32 | 0.29 | -2.15 | 872  |
| 178 | 8   | 190 | 107 | -17 | 2.57 | 2.34 | 0.32 | 0.29 | -2.10 | 1062 |
| 156 | 7.0 | 166 | 107 | -15 | 2.26 | 2.05 | 0.32 | 0.29 | -2.07 | 904  |
| 116 | 5.2 | 123 | 107 | -11 | 1.69 | 1.52 | 0.32 | 0.29 | -2.07 | 619  |
| 163 | 7.3 | 173 | 106 | -15 | 2.36 | 2.14 | 0.32 | 0.29 | -2.03 | 952  |
| 101 | 4.5 | 107 | 106 | -9  | 1.47 | 1.33 | 0.33 | 0.29 | -2.02 | 508  |
| 101 | 4.5 | 107 | 106 | -9  | 1.47 | 1.33 | 0.33 | 0.29 | -2.02 | 508  |
| 101 | 4.5 | 107 | 106 | -9  | 1.47 | 1.33 | 0.33 | 0.29 | -2.02 | 508  |
| 121 | 5.4 | 128 | 106 | -11 | 1.76 | 1.59 | 0.33 | 0.29 | -1.97 | 651  |
| 121 | 5.4 | 128 | 106 | -11 | 1.76 | 1.59 | 0.33 | 0.29 | -1.97 | 651  |
| 121 | 5.4 | 128 | 106 | -11 | 1.76 | 1.59 | 0.33 | 0.29 | -1.97 | 651  |

|     |     |     |     |     |      |      |      |      |       |      |
|-----|-----|-----|-----|-----|------|------|------|------|-------|------|
| 121 | 5.4 | 128 | 106 | -11 | 1.76 | 1.59 | 0.33 | 0.29 | -1.97 | 651  |
| 157 | 7   | 166 | 106 | -14 | 2.27 | 2.06 | 0.32 | 0.29 | -1.95 | 904  |
| 101 | 4.5 | 107 | 106 | -9  | 1.47 | 1.33 | 0.33 | 0.29 | -1.94 | 508  |
| 101 | 4.5 | 107 | 106 | -9  | 1.47 | 1.33 | 0.33 | 0.29 | -1.94 | 508  |
| 101 | 4.5 | 107 | 106 | -9  | 1.47 | 1.33 | 0.33 | 0.29 | -1.94 | 508  |
| 101 | 4.5 | 107 | 106 | -9  | 1.47 | 1.33 | 0.33 | 0.29 | -1.94 | 508  |
| 101 | 4.5 | 107 | 106 | -9  | 1.47 | 1.33 | 0.33 | 0.29 | -1.94 | 508  |
| 101 | 4.5 | 107 | 106 | -9  | 1.47 | 1.33 | 0.33 | 0.29 | -1.94 | 508  |
| 166 | 7.4 | 175 | 106 | -14 | 2.40 | 2.18 | 0.32 | 0.30 | -1.93 | 967  |
| 126 | 5.6 | 133 | 106 | -11 | 1.83 | 1.66 | 0.33 | 0.30 | -1.93 | 682  |
| 146 | 6.5 | 154 | 106 | -12 | 2.11 | 1.92 | 0.33 | 0.30 | -1.91 | 825  |
| 146 | 6.5 | 154 | 106 | -12 | 2.11 | 1.92 | 0.33 | 0.30 | -1.91 | 825  |
| 191 | 8.5 | 201 | 106 | -16 | 2.75 | 2.51 | 0.32 | 0.30 | -1.88 | 1142 |
| 113 | 5   | 119 | 106 | -9  | 1.64 | 1.48 | 0.33 | 0.30 | -1.89 | 587  |
| 162 | 7.2 | 171 | 106 | -13 | 2.34 | 2.13 | 0.32 | 0.30 | -1.86 | 936  |
| 151 | 6.7 | 159 | 106 | -12 | 2.18 | 1.99 | 0.33 | 0.30 | -1.86 | 857  |
| 171 | 7.6 | 180 | 105 | -14 | 2.47 | 2.25 | 0.32 | 0.30 | -1.84 | 999  |
| 79  | 3.5 | 83  | 105 | -6  | 1.16 | 1.04 | 0.33 | 0.30 | -1.84 | 350  |
| 124 | 5.5 | 130 | 105 | -10 | 1.80 | 1.63 | 0.33 | 0.30 | -1.83 | 667  |
| 131 | 5.8 | 137 | 105 | -10 | 1.90 | 1.72 | 0.33 | 0.30 | -1.79 | 714  |
| 181 | 8   | 190 | 105 | -14 | 2.61 | 2.38 | 0.33 | 0.30 | -1.79 | 1062 |
| 181 | 8   | 190 | 105 | -14 | 2.61 | 2.38 | 0.33 | 0.30 | -1.79 | 1062 |
| 113 | 5.0 | 119 | 105 | -9  | 1.64 | 1.48 | 0.33 | 0.30 | -1.79 | 587  |
| 113 | 5.0 | 119 | 105 | -9  | 1.64 | 1.48 | 0.33 | 0.30 | -1.79 | 587  |
| 165 | 7.3 | 173 | 105 | -13 | 2.38 | 2.17 | 0.33 | 0.30 | -1.76 | 952  |
| 106 | 4.7 | 111 | 105 | -8  | 1.54 | 1.39 | 0.33 | 0.30 | -1.75 | 540  |
| 181 | 8   | 190 | 105 | -14 | 2.61 | 2.38 | 0.33 | 0.30 | -1.74 | 1062 |

|     |     |     |     |     |      |      |      |      |       |      |
|-----|-----|-----|-----|-----|------|------|------|------|-------|------|
| 181 | 8.0 | 190 | 105 | -14 | 2.61 | 2.38 | 0.33 | 0.30 | -1.74 | 1062 |
| 131 | 5.8 | 137 | 105 | -10 | 1.90 | 1.72 | 0.33 | 0.30 | -1.71 | 714  |
| 131 | 5.8 | 137 | 105 | -10 | 1.90 | 1.72 | 0.33 | 0.30 | -1.71 | 714  |
| 136 | 6.0 | 142 | 105 | -10 | 1.97 | 1.79 | 0.33 | 0.30 | -1.71 | 746  |
| 136 | 6.0 | 142 | 105 | -10 | 1.97 | 1.79 | 0.33 | 0.30 | -1.71 | 746  |
| 111 | 4.9 | 116 | 105 | -8  | 1.61 | 1.46 | 0.33 | 0.30 | -1.71 | 572  |
| 91  | 4   | 95  | 105 | -7  | 1.33 | 1.20 | 0.33 | 0.30 | -1.71 | 429  |
| 91  | 4   | 95  | 105 | -7  | 1.33 | 1.20 | 0.33 | 0.30 | -1.71 | 429  |
| 91  | 4   | 95  | 105 | -7  | 1.33 | 1.20 | 0.33 | 0.30 | -1.71 | 429  |
| 91  | 4   | 95  | 105 | -7  | 1.33 | 1.20 | 0.33 | 0.30 | -1.71 | 429  |
| 91  | 4   | 95  | 105 | -7  | 1.33 | 1.20 | 0.33 | 0.30 | -1.71 | 429  |
| 91  | 4   | 95  | 105 | -7  | 1.33 | 1.20 | 0.33 | 0.30 | -1.71 | 429  |
| 91  | 4   | 95  | 105 | -7  | 1.33 | 1.20 | 0.33 | 0.30 | -1.71 | 429  |
| 91  | 4   | 95  | 105 | -7  | 1.33 | 1.20 | 0.33 | 0.30 | -1.71 | 429  |
| 91  | 4   | 95  | 105 | -7  | 1.33 | 1.20 | 0.33 | 0.30 | -1.71 | 429  |
| 91  | 4   | 95  | 105 | -7  | 1.33 | 1.20 | 0.33 | 0.30 | -1.71 | 429  |
| 91  | 4   | 95  | 105 | -7  | 1.33 | 1.20 | 0.33 | 0.30 | -1.71 | 429  |
| 91  | 4   | 95  | 105 | -7  | 1.33 | 1.20 | 0.33 | 0.30 | -1.71 | 429  |
| 161 | 7.1 | 168 | 105 | -12 | 2.32 | 2.12 | 0.33 | 0.30 | -1.69 | 920  |
| 159 | 7   | 166 | 105 | -12 | 2.29 | 2.09 | 0.33 | 0.30 | -1.67 | 904  |
| 159 | 7   | 166 | 105 | -12 | 2.29 | 2.09 | 0.33 | 0.30 | -1.65 | 904  |
| 125 | 5.5 | 130 | 105 | -9  | 1.81 | 1.64 | 0.33 | 0.30 | -1.66 | 667  |
| 91  | 4   | 95  | 105 | -7  | 1.33 | 1.20 | 0.33 | 0.30 | -1.66 | 429  |
| 91  | 4   | 95  | 105 | -7  | 1.33 | 1.20 | 0.33 | 0.30 | -1.66 | 429  |
| 91  | 4   | 95  | 105 | -7  | 1.33 | 1.20 | 0.33 | 0.30 | -1.66 | 429  |
| 91  | 4   | 95  | 105 | -7  | 1.33 | 1.20 | 0.33 | 0.30 | -1.66 | 429  |
| 91  | 4.0 | 95  | 105 | -7  | 1.33 | 1.20 | 0.33 | 0.30 | -1.66 | 429  |
| 91  | 4.0 | 95  | 105 | -7  | 1.33 | 1.20 | 0.33 | 0.30 | -1.66 | 429  |

|     |     |     |     |     |      |      |      |      |       |     |
|-----|-----|-----|-----|-----|------|------|------|------|-------|-----|
| 91  | 4.0 | 95  | 105 | -7  | 1.33 | 1.20 | 0.33 | 0.30 | -1.66 | 429 |
| 141 | 6.2 | 147 | 104 | -10 | 2.04 | 1.85 | 0.33 | 0.30 | -1.64 | 777 |
| 116 | 5.1 | 121 | 104 | -8  | 1.68 | 1.52 | 0.33 | 0.30 | -1.64 | 603 |
| 116 | 5.1 | 121 | 104 | -8  | 1.68 | 1.52 | 0.33 | 0.30 | -1.64 | 603 |
| 121 | 5.3 | 126 | 104 | -9  | 1.75 | 1.59 | 0.33 | 0.30 | -1.63 | 635 |
| 146 | 6.4 | 152 | 104 | -10 | 2.11 | 1.92 | 0.33 | 0.30 | -1.61 | 809 |
| 171 | 7.5 | 178 | 104 | -12 | 2.46 | 2.25 | 0.33 | 0.30 | -1.60 | 983 |
| 103 | 4.5 | 107 | 104 | -7  | 1.50 | 1.35 | 0.33 | 0.30 | -1.59 | 508 |
| 171 | 7.5 | 178 | 104 | -12 | 2.46 | 2.25 | 0.33 | 0.30 | -1.57 | 983 |
| 137 | 6   | 142 | 104 | -9  | 1.98 | 1.80 | 0.33 | 0.30 | -1.51 | 746 |
| 115 | 5   | 119 | 104 | -7  | 1.66 | 1.51 | 0.33 | 0.30 | -1.50 | 587 |
| 126 | 5.5 | 130 | 104 | -8  | 1.82 | 1.66 | 0.33 | 0.30 | -1.48 | 667 |
| 126 | 5.5 | 130 | 104 | -8  | 1.82 | 1.66 | 0.33 | 0.30 | -1.48 | 667 |
| 126 | 5.5 | 130 | 103 | -8  | 1.82 | 1.66 | 0.33 | 0.30 | -1.41 | 667 |
| 126 | 5.5 | 130 | 103 | -8  | 1.82 | 1.66 | 0.33 | 0.30 | -1.41 | 667 |
| 126 | 5.5 | 130 | 103 | -8  | 1.82 | 1.66 | 0.33 | 0.30 | -1.41 | 667 |
| 126 | 5.5 | 130 | 103 | -8  | 1.82 | 1.66 | 0.33 | 0.30 | -1.41 | 667 |
| 126 | 5.5 | 130 | 103 | -8  | 1.82 | 1.66 | 0.33 | 0.30 | -1.41 | 667 |
| 92  | 4   | 95  | 103 | -6  | 1.34 | 1.21 | 0.33 | 0.30 | -1.41 | 429 |
| 131 | 5.7 | 135 | 103 | -8  | 1.89 | 1.72 | 0.33 | 0.30 | -1.40 | 698 |
| 129 | 5.6 | 133 | 103 | -8  | 1.86 | 1.70 | 0.33 | 0.30 | -1.40 | 682 |
| 161 | 7   | 166 | 103 | -10 | 2.31 | 2.12 | 0.33 | 0.30 | -1.39 | 904 |
| 161 | 7   | 166 | 103 | -10 | 2.31 | 2.12 | 0.33 | 0.30 | -1.39 | 904 |
| 161 | 7   | 166 | 103 | -10 | 2.31 | 2.12 | 0.33 | 0.30 | -1.39 | 904 |
| 161 | 7   | 166 | 103 | -10 | 2.31 | 2.12 | 0.33 | 0.30 | -1.39 | 904 |
| 161 | 7   | 166 | 103 | -10 | 2.31 | 2.12 | 0.33 | 0.30 | -1.39 | 904 |
| 161 | 7   | 166 | 103 | -10 | 2.31 | 2.12 | 0.33 | 0.30 | -1.39 | 904 |

|     |     |     |     |     |      |      |      |      |       |      |
|-----|-----|-----|-----|-----|------|------|------|------|-------|------|
| 161 | 7   | 166 | 103 | -10 | 2.31 | 2.12 | 0.33 | 0.30 | -1.38 | 904  |
| 161 | 7   | 166 | 103 | -10 | 2.31 | 2.12 | 0.33 | 0.30 | -1.38 | 904  |
| 161 | 7   | 166 | 103 | -10 | 2.31 | 2.12 | 0.33 | 0.30 | -1.38 | 904  |
| 161 | 7   | 166 | 103 | -10 | 2.31 | 2.12 | 0.33 | 0.30 | -1.38 | 904  |
| 161 | 7   | 166 | 103 | -10 | 2.31 | 2.12 | 0.33 | 0.30 | -1.38 | 904  |
| 161 | 7   | 166 | 103 | -10 | 2.31 | 2.12 | 0.33 | 0.30 | -1.38 | 904  |
| 161 | 7.0 | 166 | 103 | -10 | 2.31 | 2.12 | 0.33 | 0.30 | -1.38 | 904  |
| 161 | 7.0 | 166 | 103 | -10 | 2.31 | 2.12 | 0.33 | 0.30 | -1.38 | 904  |
| 161 | 7.0 | 166 | 103 | -10 | 2.31 | 2.12 | 0.33 | 0.30 | -1.38 | 904  |
| 161 | 7.0 | 166 | 103 | -10 | 2.31 | 2.12 | 0.33 | 0.30 | -1.38 | 904  |
| 161 | 7.0 | 166 | 103 | -10 | 2.31 | 2.12 | 0.33 | 0.30 | -1.38 | 904  |
| 161 | 7.0 | 166 | 103 | -10 | 2.31 | 2.12 | 0.33 | 0.30 | -1.38 | 904  |
| 141 | 6.1 | 145 | 103 | -8  | 2.03 | 1.85 | 0.33 | 0.30 | -1.34 | 762  |
| 111 | 4.8 | 114 | 103 | -6  | 1.61 | 1.46 | 0.33 | 0.30 | -1.33 | 556  |
| 111 | 4.8 | 114 | 103 | -6  | 1.61 | 1.46 | 0.33 | 0.30 | -1.33 | 556  |
| 150 | 6.5 | 154 | 103 | -8  | 2.16 | 1.97 | 0.33 | 0.30 | -1.30 | 825  |
| 116 | 5   | 119 | 103 | -6  | 1.68 | 1.52 | 0.34 | 0.30 | -1.30 | 587  |
| 81  | 3.5 | 83  | 103 | -5  | 1.18 | 1.06 | 0.34 | 0.30 | -1.30 | 350  |
| 81  | 3.5 | 83  | 103 | -5  | 1.18 | 1.06 | 0.34 | 0.30 | -1.30 | 350  |
| 81  | 3.5 | 83  | 103 | -5  | 1.18 | 1.06 | 0.34 | 0.30 | -1.30 | 350  |
| 81  | 3.5 | 83  | 103 | -5  | 1.18 | 1.06 | 0.34 | 0.30 | -1.30 | 350  |
| 81  | 3.5 | 83  | 103 | -4  | 1.18 | 1.06 | 0.34 | 0.30 | -1.28 | 350  |
| 81  | 3.5 | 83  | 103 | -4  | 1.18 | 1.06 | 0.34 | 0.30 | -1.28 | 350  |
| 81  | 3.5 | 83  | 103 | -4  | 1.18 | 1.06 | 0.34 | 0.30 | -1.28 | 350  |
| 81  | 3.5 | 83  | 103 | -4  | 1.18 | 1.06 | 0.34 | 0.30 | -1.28 | 350  |
| 141 | 6.1 | 145 | 103 | -8  | 2.03 | 1.85 | 0.33 | 0.30 | -1.27 | 762  |
| 181 | 7.8 | 185 | 102 | -9  | 2.59 | 2.38 | 0.33 | 0.31 | -1.19 | 1031 |

|     |     |     |     |    |      |      |      |      |       |      |
|-----|-----|-----|-----|----|------|------|------|------|-------|------|
| 139 | 6   | 142 | 102 | -7 | 2.00 | 1.83 | 0.33 | 0.30 | -1.19 | 746  |
| 181 | 7.8 | 185 | 102 | -9 | 2.59 | 2.38 | 0.33 | 0.31 | -1.17 | 1031 |
| 146 | 6.3 | 149 | 102 | -7 | 2.10 | 1.92 | 0.33 | 0.30 | -1.16 | 793  |
| 151 | 6.5 | 154 | 102 | -8 | 2.17 | 1.99 | 0.33 | 0.31 | -1.15 | 825  |
| 151 | 6.5 | 154 | 102 | -8 | 2.17 | 1.99 | 0.33 | 0.31 | -1.15 | 825  |
| 151 | 6.5 | 154 | 102 | -8 | 2.17 | 1.99 | 0.33 | 0.31 | -1.15 | 825  |
| 151 | 6.5 | 154 | 102 | -7 | 2.17 | 1.99 | 0.33 | 0.31 | -1.15 | 825  |
| 151 | 6.5 | 154 | 102 | -7 | 2.17 | 1.99 | 0.33 | 0.31 | -1.15 | 825  |
| 151 | 6.5 | 154 | 102 | -7 | 2.17 | 1.99 | 0.33 | 0.31 | -1.15 | 825  |
| 151 | 6.5 | 154 | 102 | -7 | 2.17 | 1.99 | 0.33 | 0.31 | -1.15 | 825  |
| 151 | 6.5 | 154 | 102 | -7 | 2.17 | 1.99 | 0.33 | 0.31 | -1.15 | 825  |
| 151 | 6.5 | 154 | 102 | -7 | 2.17 | 1.99 | 0.33 | 0.31 | -1.15 | 825  |
| 121 | 5.2 | 123 | 102 | -6 | 1.74 | 1.59 | 0.34 | 0.31 | -1.13 | 619  |
| 191 | 8.2 | 194 | 102 | -9 | 2.73 | 2.51 | 0.33 | 0.31 | -1.08 | 1094 |
| 201 | 8.6 | 204 | 102 | -9 | 2.87 | 2.64 | 0.33 | 0.31 | -1.00 | 1157 |
| 164 | 7   | 166 | 101 | -7 | 2.35 | 2.16 | 0.34 | 0.31 | -0.97 | 904  |
| 136 | 5.8 | 137 | 101 | -6 | 1.95 | 1.79 | 0.34 | 0.31 | -0.95 | 714  |
| 211 | 9   | 213 | 101 | -8 | 3.01 | 2.78 | 0.33 | 0.31 | -0.93 | 1221 |
| 211 | 9.0 | 213 | 101 | -8 | 3.01 | 2.78 | 0.33 | 0.31 | -0.93 | 1221 |
| 106 | 4.5 | 107 | 101 | -4 | 1.53 | 1.39 | 0.34 | 0.31 | -0.94 | 508  |
| 106 | 4.5 | 107 | 101 | -4 | 1.53 | 1.39 | 0.34 | 0.31 | -0.94 | 508  |
| 176 | 7.5 | 178 | 101 | -7 | 2.52 | 2.32 | 0.34 | 0.31 | -0.92 | 983  |
| 141 | 6   | 142 | 101 | -5 | 2.02 | 1.85 | 0.34 | 0.31 | -0.90 | 746  |
| 141 | 6   | 142 | 101 | -5 | 2.02 | 1.85 | 0.34 | 0.31 | -0.90 | 746  |
| 141 | 6   | 142 | 101 | -5 | 2.02 | 1.85 | 0.34 | 0.31 | -0.90 | 746  |
| 141 | 6   | 142 | 101 | -5 | 2.02 | 1.85 | 0.34 | 0.31 | -0.90 | 746  |
| 141 | 6   | 142 | 101 | -5 | 2.02 | 1.85 | 0.34 | 0.31 | -0.90 | 746  |

|     |     |     |     |    |      |      |      |      |       |     |
|-----|-----|-----|-----|----|------|------|------|------|-------|-----|
| 141 | 6   | 142 | 101 | -5 | 2.02 | 1.85 | 0.34 | 0.31 | -0.90 | 746 |
| 141 | 6   | 142 | 101 | -5 | 2.02 | 1.85 | 0.34 | 0.31 | -0.90 | 746 |
| 141 | 6   | 142 | 101 | -5 | 2.02 | 1.85 | 0.34 | 0.31 | -0.90 | 746 |
| 141 | 6.0 | 142 | 101 | -5 | 2.02 | 1.85 | 0.34 | 0.31 | -0.90 | 746 |
| 141 | 6.0 | 142 | 101 | -5 | 2.02 | 1.85 | 0.34 | 0.31 | -0.90 | 746 |
| 141 | 6.0 | 142 | 101 | -5 | 2.02 | 1.85 | 0.34 | 0.31 | -0.90 | 746 |
| 141 | 6.0 | 142 | 101 | -5 | 2.02 | 1.85 | 0.34 | 0.31 | -0.90 | 746 |
| 141 | 6   | 142 | 101 | -5 | 2.02 | 1.85 | 0.34 | 0.31 | -0.86 | 746 |
| 141 | 6   | 142 | 101 | -5 | 2.02 | 1.85 | 0.34 | 0.31 | -0.86 | 746 |
| 141 | 6   | 142 | 101 | -5 | 2.02 | 1.85 | 0.34 | 0.31 | -0.86 | 746 |
| 141 | 6   | 142 | 101 | -5 | 2.02 | 1.85 | 0.34 | 0.31 | -0.86 | 746 |
| 141 | 6   | 142 | 101 | -5 | 2.02 | 1.85 | 0.34 | 0.31 | -0.86 | 746 |
| 106 | 4.5 | 107 | 101 | -4 | 1.53 | 1.39 | 0.34 | 0.31 | -0.86 | 508 |
| 106 | 4.5 | 107 | 101 | -4 | 1.53 | 1.39 | 0.34 | 0.31 | -0.86 | 508 |
| 106 | 4.5 | 107 | 101 | -4 | 1.53 | 1.39 | 0.34 | 0.31 | -0.86 | 508 |
| 151 | 6.4 | 152 | 101 | -5 | 2.16 | 1.99 | 0.34 | 0.31 | -0.85 | 809 |
| 151 | 6.4 | 152 | 101 | -5 | 2.16 | 1.99 | 0.34 | 0.31 | -0.85 | 809 |
| 165 | 7   | 166 | 101 | -6 | 2.36 | 2.17 | 0.34 | 0.31 | -0.83 | 904 |
| 151 | 6.4 | 152 | 101 | -5 | 2.16 | 1.99 | 0.34 | 0.31 | -0.80 | 809 |
| 71  | 3   | 71  | 101 | -2 | 1.04 | 0.93 | 0.35 | 0.31 | -0.79 | 271 |
| 71  | 3   | 71  | 101 | -2 | 1.04 | 0.93 | 0.35 | 0.31 | -0.79 | 271 |
| 71  | 3   | 71  | 101 | -2 | 1.04 | 0.93 | 0.35 | 0.31 | -0.79 | 271 |
| 71  | 3   | 71  | 101 | -2 | 1.04 | 0.93 | 0.35 | 0.31 | -0.79 | 271 |
| 71  | 3.0 | 71  | 101 | -2 | 1.04 | 0.93 | 0.35 | 0.31 | -0.79 | 271 |
| 71  | 3   | 71  | 100 | -2 | 1.04 | 0.93 | 0.35 | 0.31 | -0.76 | 271 |
| 95  | 4   | 95  | 100 | -3 | 1.37 | 1.25 | 0.34 | 0.31 | -0.73 | 429 |
| 119 | 5   | 119 | 100 | -4 | 1.71 | 1.56 | 0.34 | 0.31 | -0.71 | 587 |

|     |     |     |     |    |      |      |      |      |       |      |
|-----|-----|-----|-----|----|------|------|------|------|-------|------|
| 121 | 5.1 | 121 | 100 | -4 | 1.74 | 1.59 | 0.34 | 0.31 | -0.71 | 603  |
| 130 | 5.5 | 130 | 100 | -4 | 1.87 | 1.71 | 0.34 | 0.31 | -0.70 | 667  |
| 161 | 6.8 | 161 | 100 | -5 | 2.30 | 2.12 | 0.34 | 0.31 | -0.69 | 872  |
| 161 | 6.8 | 161 | 100 | -5 | 2.30 | 2.12 | 0.34 | 0.31 | -0.69 | 872  |
| 171 | 7.2 | 171 | 100 | -5 | 2.44 | 2.25 | 0.34 | 0.31 | -0.69 | 936  |
| 121 | 5.1 | 121 | 100 | -3 | 1.74 | 1.59 | 0.34 | 0.31 | -0.69 | 603  |
| 95  | 4   | 95  | 100 | -3 | 1.37 | 1.25 | 0.34 | 0.31 | -0.68 | 429  |
| 171 | 7.2 | 171 | 100 | -5 | 2.44 | 2.25 | 0.34 | 0.31 | -0.64 | 936  |
| 171 | 7.2 | 171 | 100 | -5 | 2.44 | 2.25 | 0.34 | 0.31 | -0.64 | 936  |
| 131 | 5.5 | 130 | 100 | -3 | 1.88 | 1.72 | 0.34 | 0.31 | -0.59 | 667  |
| 131 | 5.5 | 130 | 100 | -3 | 1.88 | 1.72 | 0.34 | 0.31 | -0.59 | 667  |
| 131 | 5.5 | 130 | 100 | -3 | 1.88 | 1.72 | 0.34 | 0.31 | -0.59 | 667  |
| 131 | 5.5 | 130 | 100 | -3 | 1.88 | 1.72 | 0.34 | 0.31 | -0.59 | 667  |
| 131 | 5.5 | 130 | 100 | -3 | 1.88 | 1.72 | 0.34 | 0.31 | -0.59 | 667  |
| 131 | 5.5 | 130 | 100 | -3 | 1.88 | 1.72 | 0.34 | 0.31 | -0.59 | 667  |
| 131 | 5.5 | 130 | 100 | -3 | 1.88 | 1.72 | 0.34 | 0.31 | -0.59 | 667  |
| 131 | 5.5 | 130 | 100 | -3 | 1.88 | 1.72 | 0.34 | 0.31 | -0.59 | 667  |
| 131 | 5.5 | 130 | 100 | -3 | 1.88 | 1.72 | 0.34 | 0.31 | -0.59 | 667  |
| 131 | 5.5 | 130 | 100 | -3 | 1.88 | 1.72 | 0.34 | 0.31 | -0.59 | 667  |
| 131 | 5.5 | 130 | 100 | -3 | 1.88 | 1.72 | 0.34 | 0.31 | -0.59 | 667  |
| 131 | 5.5 | 130 | 100 | -3 | 1.88 | 1.72 | 0.34 | 0.31 | -0.59 | 667  |
| 131 | 5.5 | 130 | 100 | -3 | 1.88 | 1.72 | 0.34 | 0.31 | -0.59 | 667  |
| 131 | 5.5 | 130 | 100 | -3 | 1.88 | 1.72 | 0.34 | 0.31 | -0.59 | 667  |
| 131 | 5.5 | 130 | 100 | -3 | 1.88 | 1.72 | 0.34 | 0.31 | -0.59 | 667  |
| 131 | 5.5 | 130 | 100 | -3 | 1.88 | 1.72 | 0.34 | 0.31 | -0.59 | 667  |
| 191 | 8   | 190 | 100 | -5 | 2.72 | 2.51 | 0.34 | 0.31 | -0.57 | 1062 |
| 191 | 8   | 190 | 100 | -5 | 2.72 | 2.51 | 0.34 | 0.31 | -0.57 | 1062 |
| 191 | 8   | 190 | 100 | -5 | 2.72 | 2.51 | 0.34 | 0.31 | -0.57 | 1062 |



|     |     |     |     |    |      |      |      |      |       |      |
|-----|-----|-----|-----|----|------|------|------|------|-------|------|
| 143 | 6   | 142 | 100 | -3 | 2.04 | 1.88 | 0.34 | 0.31 | -0.54 | 746  |
| 131 | 5.5 | 130 | 99  | -3 | 1.88 | 1.72 | 0.34 | 0.31 | -0.53 | 667  |
| 131 | 5.5 | 130 | 99  | -3 | 1.88 | 1.72 | 0.34 | 0.31 | -0.53 | 667  |
| 131 | 5.5 | 130 | 99  | -3 | 1.88 | 1.72 | 0.34 | 0.31 | -0.53 | 667  |
| 131 | 5.5 | 130 | 99  | -3 | 1.88 | 1.72 | 0.34 | 0.31 | -0.53 | 667  |
| 131 | 5.5 | 130 | 99  | -3 | 1.88 | 1.72 | 0.34 | 0.31 | -0.53 | 667  |
| 131 | 5.5 | 130 | 99  | -3 | 1.88 | 1.72 | 0.34 | 0.31 | -0.53 | 667  |
| 131 | 5.5 | 130 | 99  | -3 | 1.88 | 1.72 | 0.34 | 0.31 | -0.53 | 667  |
| 131 | 5.5 | 130 | 99  | -3 | 1.88 | 1.72 | 0.34 | 0.31 | -0.53 | 667  |
| 131 | 5.5 | 130 | 99  | -3 | 1.88 | 1.72 | 0.34 | 0.31 | -0.53 | 667  |
| 131 | 5.5 | 130 | 99  | -3 | 1.88 | 1.72 | 0.34 | 0.31 | -0.53 | 667  |
| 131 | 5.5 | 130 | 99  | -3 | 1.88 | 1.72 | 0.34 | 0.31 | -0.53 | 667  |
| 131 | 5.5 | 130 | 99  | -3 | 1.88 | 1.72 | 0.34 | 0.31 | -0.53 | 667  |
| 131 | 5.5 | 130 | 99  | -3 | 1.88 | 1.72 | 0.34 | 0.31 | -0.53 | 667  |
| 131 | 5.5 | 130 | 99  | -3 | 1.88 | 1.72 | 0.34 | 0.31 | -0.53 | 667  |
| 131 | 5.5 | 130 | 99  | -3 | 1.88 | 1.72 | 0.34 | 0.31 | -0.53 | 667  |
| 131 | 5.5 | 130 | 99  | -3 | 1.88 | 1.72 | 0.34 | 0.31 | -0.53 | 667  |
| 131 | 5.5 | 130 | 99  | -3 | 1.88 | 1.72 | 0.34 | 0.31 | -0.53 | 667  |
| 131 | 5.5 | 130 | 99  | -3 | 1.88 | 1.72 | 0.34 | 0.31 | -0.53 | 667  |
| 131 | 5.5 | 130 | 99  | -3 | 1.88 | 1.72 | 0.34 | 0.31 | -0.53 | 667  |
| 131 | 5.5 | 130 | 99  | -3 | 1.88 | 1.72 | 0.34 | 0.31 | -0.53 | 667  |
| 131 | 5.5 | 130 | 99  | -3 | 1.88 | 1.72 | 0.34 | 0.31 | -0.53 | 667  |
| 131 | 5.5 | 130 | 99  | -3 | 1.88 | 1.72 | 0.34 | 0.31 | -0.53 | 667  |
| 191 | 8.0 | 190 | 99  | -4 | 2.72 | 2.51 | 0.34 | 0.31 | -0.52 | 1062 |
| 191 | 8.0 | 190 | 99  | -4 | 2.72 | 2.51 | 0.34 | 0.31 | -0.52 | 1062 |
| 141 | 5.9 | 140 | 99  | -3 | 2.01 | 1.85 | 0.34 | 0.31 | -0.51 | 730  |
| 101 | 4.2 | 100 | 99  | -2 | 1.45 | 1.33 | 0.35 | 0.32 | -0.50 | 461  |
| 101 | 4.2 | 100 | 99  | -2 | 1.45 | 1.33 | 0.35 | 0.32 | -0.50 | 461  |

|     |     |     |    |    |      |      |      |      |       |     |
|-----|-----|-----|----|----|------|------|------|------|-------|-----|
| 96  | 4   | 95  | 99 | -2 | 1.38 | 1.26 | 0.35 | 0.32 | -0.49 | 429 |
| 96  | 4   | 95  | 99 | -2 | 1.38 | 1.26 | 0.35 | 0.32 | -0.49 | 429 |
| 91  | 3.8 | 90  | 99 | -2 | 1.31 | 1.20 | 0.35 | 0.31 | -0.48 | 397 |
| 91  | 3.8 | 90  | 99 | -2 | 1.31 | 1.20 | 0.35 | 0.31 | -0.48 | 397 |
| 127 | 5.3 | 126 | 99 | -2 | 1.82 | 1.67 | 0.34 | 0.31 | -0.45 | 635 |
| 96  | 4.0 | 95  | 99 | -2 | 1.38 | 1.26 | 0.35 | 0.32 | -0.44 | 429 |
| 161 | 6.7 | 159 | 99 | -3 | 2.29 | 2.12 | 0.34 | 0.32 | -0.40 | 857 |
| 156 | 6.5 | 154 | 99 | -3 | 2.22 | 2.05 | 0.34 | 0.32 | -0.40 | 825 |
| 101 | 4.2 | 100 | 99 | -2 | 1.45 | 1.33 | 0.35 | 0.32 | -0.39 | 461 |
| 121 | 5   | 119 | 99 | -2 | 1.73 | 1.59 | 0.35 | 0.32 | -0.32 | 587 |
| 121 | 5   | 119 | 99 | -2 | 1.73 | 1.59 | 0.35 | 0.32 | -0.32 | 587 |
| 121 | 5   | 119 | 99 | -2 | 1.73 | 1.59 | 0.35 | 0.32 | -0.32 | 587 |
| 121 | 5   | 119 | 99 | -2 | 1.73 | 1.59 | 0.35 | 0.32 | -0.32 | 587 |
| 121 | 5   | 119 | 99 | -2 | 1.73 | 1.59 | 0.35 | 0.32 | -0.32 | 587 |
| 121 | 5   | 119 | 99 | -2 | 1.73 | 1.59 | 0.35 | 0.32 | -0.32 | 587 |
| 121 | 5   | 119 | 99 | -2 | 1.73 | 1.59 | 0.35 | 0.32 | -0.32 | 587 |
| 121 | 5   | 119 | 99 | -2 | 1.73 | 1.59 | 0.35 | 0.32 | -0.32 | 587 |
| 121 | 5   | 119 | 99 | -2 | 1.73 | 1.59 | 0.35 | 0.32 | -0.32 | 587 |
| 121 | 5   | 119 | 99 | -2 | 1.73 | 1.59 | 0.35 | 0.32 | -0.32 | 587 |
| 121 | 5   | 119 | 99 | -2 | 1.73 | 1.59 | 0.35 | 0.32 | -0.32 | 587 |
| 121 | 5   | 119 | 99 | -2 | 1.73 | 1.59 | 0.35 | 0.32 | -0.32 | 587 |
| 121 | 5   | 119 | 99 | -2 | 1.73 | 1.59 | 0.35 | 0.32 | -0.32 | 587 |
| 121 | 5   | 119 | 99 | -2 | 1.73 | 1.59 | 0.35 | 0.32 | -0.32 | 587 |
| 121 | 5   | 119 | 99 | -2 | 1.73 | 1.59 | 0.35 | 0.32 | -0.32 | 587 |
| 121 | 5   | 119 | 99 | -2 | 1.73 | 1.59 | 0.35 | 0.32 | -0.32 | 587 |
| 121 | 5   | 119 | 99 | -2 | 1.73 | 1.59 | 0.35 | 0.32 | -0.32 | 587 |
| 116 | 4.8 | 114 | 99 | -1 | 1.66 | 1.52 | 0.35 | 0.32 | -0.31 | 556 |
| 111 | 4.6 | 109 | 98 | -1 | 1.59 | 1.46 | 0.35 | 0.32 | -0.30 | 524 |
| 176 | 7.3 | 173 | 98 | -2 | 2.50 | 2.32 | 0.34 | 0.32 | -0.29 | 952 |

|     |     |     |    |    |      |      |      |      |       |     |
|-----|-----|-----|----|----|------|------|------|------|-------|-----|
| 181 | 7.5 | 178 | 98 | -2 | 2.57 | 2.38 | 0.34 | 0.32 | -0.27 | 983 |
| 181 | 7.5 | 178 | 98 | -2 | 2.57 | 2.38 | 0.34 | 0.32 | -0.27 | 983 |
| 116 | 4.8 | 114 | 98 | -1 | 1.66 | 1.52 | 0.35 | 0.32 | -0.26 | 556 |
| 159 | 6.6 | 156 | 98 | -2 | 2.26 | 2.09 | 0.34 | 0.32 | -0.25 | 841 |
| 121 | 5   | 119 | 98 | -1 | 1.73 | 1.59 | 0.35 | 0.32 | -0.22 | 587 |
| 121 | 5   | 119 | 98 | -1 | 1.73 | 1.59 | 0.35 | 0.32 | -0.22 | 587 |
| 121 | 5   | 119 | 98 | -1 | 1.73 | 1.59 | 0.35 | 0.32 | -0.22 | 587 |
| 121 | 5   | 119 | 98 | -1 | 1.73 | 1.59 | 0.35 | 0.32 | -0.22 | 587 |
| 121 | 5.0 | 119 | 98 | -1 | 1.73 | 1.59 | 0.35 | 0.32 | -0.22 | 587 |
| 121 | 5.0 | 119 | 98 | -1 | 1.73 | 1.59 | 0.35 | 0.32 | -0.22 | 587 |
| 121 | 5.0 | 119 | 98 | -1 | 1.73 | 1.59 | 0.35 | 0.32 | -0.22 | 587 |
| 121 | 5.0 | 119 | 98 | -1 | 1.73 | 1.59 | 0.35 | 0.32 | -0.22 | 587 |
| 121 | 5.0 | 119 | 98 | -1 | 1.73 | 1.59 | 0.35 | 0.32 | -0.22 | 587 |
| 121 | 5.0 | 119 | 98 | -1 | 1.73 | 1.59 | 0.35 | 0.32 | -0.22 | 587 |
| 179 | 7.4 | 175 | 98 | -2 | 2.54 | 2.35 | 0.34 | 0.32 | -0.21 | 967 |
| 167 | 6.9 | 164 | 98 | -1 | 2.37 | 2.20 | 0.34 | 0.32 | -0.20 | 888 |
| 126 | 5.2 | 123 | 98 | -1 | 1.80 | 1.66 | 0.35 | 0.32 | -0.19 | 619 |
| 136 | 5.6 | 133 | 98 | -1 | 1.94 | 1.79 | 0.35 | 0.32 | -0.18 | 682 |
| 126 | 5.2 | 123 | 98 | -1 | 1.80 | 1.66 | 0.35 | 0.32 | -0.15 | 619 |
| 163 | 6.7 | 159 | 98 | -1 | 2.31 | 2.14 | 0.35 | 0.32 | -0.11 | 857 |
| 141 | 5.8 | 137 | 98 | -1 | 2.01 | 1.85 | 0.35 | 0.32 | -0.11 | 714 |
| 141 | 5.8 | 137 | 98 | -1 | 2.01 | 1.85 | 0.35 | 0.32 | -0.11 | 714 |
| 141 | 5.8 | 137 | 98 | -1 | 2.01 | 1.85 | 0.35 | 0.32 | -0.11 | 714 |
| 146 | 6   | 142 | 98 | 0  | 2.08 | 1.92 | 0.35 | 0.32 | -0.08 | 746 |
| 146 | 6   | 142 | 98 | 0  | 2.08 | 1.92 | 0.35 | 0.32 | -0.08 | 746 |
| 146 | 6.0 | 142 | 98 | 0  | 2.08 | 1.92 | 0.35 | 0.32 | -0.08 | 746 |
| 151 | 6.2 | 147 | 98 | 0  | 2.15 | 1.99 | 0.35 | 0.32 | -0.06 | 777 |
| 171 | 7   | 166 | 97 | 0  | 2.42 | 2.25 | 0.35 | 0.32 | 0.00  | 904 |

|     |     |     |    |   |      |      |      |      |      |      |
|-----|-----|-----|----|---|------|------|------|------|------|------|
| 171 | 7   | 166 | 97 | 0 | 2.42 | 2.25 | 0.35 | 0.32 | 0.00 | 904  |
| 171 | 7   | 166 | 97 | 0 | 2.42 | 2.25 | 0.35 | 0.32 | 0.02 | 904  |
| 171 | 7.0 | 166 | 97 | 0 | 2.42 | 2.25 | 0.35 | 0.32 | 0.02 | 904  |
| 181 | 7.4 | 175 | 97 | 0 | 2.56 | 2.38 | 0.35 | 0.32 | 0.05 | 967  |
| 191 | 7.8 | 185 | 97 | 0 | 2.70 | 2.51 | 0.35 | 0.32 | 0.06 | 1031 |
| 164 | 6.7 | 159 | 97 | 0 | 2.33 | 2.16 | 0.35 | 0.32 | 0.06 | 857  |
| 123 | 5   | 119 | 97 | 0 | 1.75 | 1.62 | 0.35 | 0.32 | 0.07 | 587  |
| 147 | 6   | 142 | 97 | 0 | 2.09 | 1.93 | 0.35 | 0.32 | 0.08 | 746  |
| 147 | 6   | 142 | 97 | 0 | 2.09 | 1.93 | 0.35 | 0.32 | 0.08 | 746  |
| 86  | 3.5 | 83  | 97 | 0 | 1.24 | 1.13 | 0.35 | 0.32 | 0.10 | 350  |
| 147 | 6   | 142 | 97 | 1 | 2.09 | 1.93 | 0.35 | 0.32 | 0.11 | 746  |
| 147 | 6   | 142 | 97 | 1 | 2.09 | 1.93 | 0.35 | 0.32 | 0.11 | 746  |
| 86  | 3.5 | 83  | 97 | 0 | 1.24 | 1.13 | 0.35 | 0.32 | 0.11 | 350  |
| 111 | 4.5 | 107 | 97 | 1 | 1.58 | 1.46 | 0.35 | 0.32 | 0.15 | 508  |
| 111 | 4.5 | 107 | 97 | 1 | 1.58 | 1.46 | 0.35 | 0.32 | 0.15 | 508  |
| 111 | 4.5 | 107 | 97 | 1 | 1.58 | 1.46 | 0.35 | 0.32 | 0.15 | 508  |
| 111 | 4.5 | 107 | 97 | 1 | 1.58 | 1.46 | 0.35 | 0.32 | 0.15 | 508  |
| 111 | 4.5 | 107 | 97 | 1 | 1.58 | 1.46 | 0.35 | 0.32 | 0.15 | 508  |
| 111 | 4.5 | 107 | 97 | 1 | 1.58 | 1.46 | 0.35 | 0.32 | 0.15 | 508  |
| 111 | 4.5 | 107 | 97 | 1 | 1.58 | 1.46 | 0.35 | 0.32 | 0.15 | 508  |
| 111 | 4.5 | 107 | 97 | 1 | 1.58 | 1.46 | 0.35 | 0.32 | 0.15 | 508  |
| 111 | 4.5 | 107 | 97 | 1 | 1.58 | 1.46 | 0.35 | 0.32 | 0.15 | 508  |
| 111 | 4.5 | 107 | 97 | 1 | 1.58 | 1.46 | 0.35 | 0.32 | 0.15 | 508  |
| 111 | 4.5 | 107 | 97 | 1 | 1.58 | 1.46 | 0.35 | 0.32 | 0.15 | 508  |
| 111 | 4.5 | 107 | 97 | 1 | 1.58 | 1.46 | 0.35 | 0.32 | 0.15 | 508  |
| 123 | 5.0 | 119 | 97 | 1 | 1.75 | 1.62 | 0.35 | 0.32 | 0.17 | 587  |
| 111 | 4.5 | 107 | 96 | 1 | 1.58 | 1.46 | 0.35 | 0.32 | 0.22 | 508  |
| 111 | 4.5 | 107 | 96 | 1 | 1.58 | 1.46 | 0.35 | 0.32 | 0.22 | 508  |
| 111 | 4.5 | 107 | 96 | 1 | 1.58 | 1.46 | 0.35 | 0.32 | 0.22 | 508  |

|     |     |     |    |   |      |      |      |      |      |     |
|-----|-----|-----|----|---|------|------|------|------|------|-----|
| 111 | 4.5 | 107 | 96 | 1 | 1.58 | 1.46 | 0.35 | 0.32 | 0.22 | 508 |
| 111 | 4.5 | 107 | 96 | 1 | 1.58 | 1.46 | 0.35 | 0.32 | 0.22 | 508 |
| 111 | 4.5 | 107 | 96 | 1 | 1.58 | 1.46 | 0.35 | 0.32 | 0.22 | 508 |
| 131 | 5.3 | 126 | 96 | 2 | 1.86 | 1.72 | 0.35 | 0.32 | 0.28 | 635 |
| 99  | 4   | 95  | 96 | 1 | 1.42 | 1.30 | 0.35 | 0.33 | 0.30 | 429 |
| 161 | 6.5 | 154 | 96 | 2 | 2.28 | 2.12 | 0.35 | 0.33 | 0.35 | 825 |
| 161 | 6.5 | 154 | 96 | 2 | 2.28 | 2.12 | 0.35 | 0.33 | 0.35 | 825 |
| 161 | 6.5 | 154 | 96 | 2 | 2.28 | 2.12 | 0.35 | 0.33 | 0.35 | 825 |
| 161 | 6.5 | 154 | 96 | 2 | 2.28 | 2.12 | 0.35 | 0.33 | 0.35 | 825 |
| 186 | 7.5 | 178 | 96 | 3 | 2.63 | 2.45 | 0.35 | 0.33 | 0.35 | 983 |
| 161 | 6.5 | 154 | 96 | 2 | 2.28 | 2.12 | 0.35 | 0.33 | 0.35 | 825 |
| 161 | 6.5 | 154 | 96 | 2 | 2.28 | 2.12 | 0.35 | 0.33 | 0.35 | 825 |
| 161 | 6.5 | 154 | 96 | 2 | 2.28 | 2.12 | 0.35 | 0.33 | 0.35 | 825 |
| 171 | 6.9 | 164 | 96 | 3 | 2.42 | 2.25 | 0.35 | 0.33 | 0.36 | 888 |
| 136 | 5.5 | 130 | 96 | 2 | 1.93 | 1.79 | 0.35 | 0.33 | 0.36 | 667 |
| 181 | 7.3 | 173 | 96 | 3 | 2.56 | 2.38 | 0.35 | 0.33 | 0.38 | 952 |
| 181 | 7.3 | 173 | 96 | 3 | 2.56 | 2.38 | 0.35 | 0.33 | 0.38 | 952 |
| 113 | 4.5 | 107 | 95 | 3 | 1.61 | 1.48 | 0.36 | 0.33 | 0.58 | 508 |
| 113 | 4.5 | 107 | 95 | 3 | 1.61 | 1.48 | 0.36 | 0.33 | 0.58 | 508 |
| 113 | 4.5 | 107 | 95 | 3 | 1.61 | 1.48 | 0.36 | 0.33 | 0.58 | 508 |
| 126 | 5   | 119 | 95 | 3 | 1.79 | 1.66 | 0.36 | 0.33 | 0.65 | 587 |
| 113 | 4.5 | 107 | 95 | 3 | 1.61 | 1.48 | 0.36 | 0.33 | 0.66 | 508 |
| 113 | 4.5 | 107 | 95 | 3 | 1.61 | 1.48 | 0.36 | 0.33 | 0.66 | 508 |
| 113 | 4.5 | 107 | 95 | 3 | 1.61 | 1.48 | 0.36 | 0.33 | 0.66 | 508 |
| 113 | 4.5 | 107 | 95 | 3 | 1.61 | 1.48 | 0.36 | 0.33 | 0.66 | 508 |
| 106 | 4.2 | 100 | 95 | 3 | 1.51 | 1.39 | 0.36 | 0.33 | 0.67 | 461 |
| 141 | 5.6 | 133 | 95 | 4 | 1.99 | 1.85 | 0.36 | 0.33 | 0.69 | 682 |

|     |     |     |    |   |      |      |      |      |      |     |
|-----|-----|-----|----|---|------|------|------|------|------|-----|
| 121 | 4.8 | 114 | 94 | 3 | 1.72 | 1.59 | 0.36 | 0.33 | 0.71 | 556 |
| 171 | 6.8 | 161 | 94 | 5 | 2.41 | 2.25 | 0.35 | 0.33 | 0.72 | 872 |
| 151 | 6   | 142 | 94 | 4 | 2.13 | 1.99 | 0.36 | 0.33 | 0.73 | 746 |
| 151 | 6   | 142 | 94 | 4 | 2.13 | 1.99 | 0.36 | 0.33 | 0.73 | 746 |
| 151 | 6   | 142 | 94 | 4 | 2.13 | 1.99 | 0.36 | 0.33 | 0.73 | 746 |
| 151 | 6   | 142 | 94 | 4 | 2.13 | 1.99 | 0.36 | 0.33 | 0.73 | 746 |
| 151 | 6   | 142 | 94 | 4 | 2.13 | 1.99 | 0.36 | 0.33 | 0.73 | 746 |
| 151 | 6   | 142 | 94 | 4 | 2.13 | 1.99 | 0.36 | 0.33 | 0.73 | 746 |
| 151 | 6   | 142 | 94 | 4 | 2.13 | 1.99 | 0.36 | 0.33 | 0.73 | 746 |
| 151 | 6   | 142 | 94 | 4 | 2.13 | 1.99 | 0.36 | 0.33 | 0.73 | 746 |
| 151 | 6   | 142 | 94 | 4 | 2.13 | 1.99 | 0.36 | 0.33 | 0.73 | 746 |
| 151 | 6   | 142 | 94 | 4 | 2.13 | 1.99 | 0.36 | 0.33 | 0.73 | 746 |
| 151 | 6   | 142 | 94 | 4 | 2.13 | 1.99 | 0.36 | 0.33 | 0.73 | 746 |
| 151 | 6   | 142 | 94 | 4 | 2.13 | 1.99 | 0.36 | 0.33 | 0.73 | 746 |
| 151 | 6.0 | 142 | 94 | 4 | 2.13 | 1.99 | 0.36 | 0.33 | 0.73 | 746 |
| 151 | 6.0 | 142 | 94 | 4 | 2.13 | 1.99 | 0.36 | 0.33 | 0.73 | 746 |
| 151 | 6.0 | 142 | 94 | 4 | 2.13 | 1.99 | 0.36 | 0.33 | 0.73 | 746 |
| 151 | 6.0 | 142 | 94 | 4 | 2.13 | 1.99 | 0.36 | 0.33 | 0.73 | 746 |
| 151 | 6.0 | 142 | 94 | 4 | 2.13 | 1.99 | 0.36 | 0.33 | 0.73 | 746 |
| 101 | 4   | 95  | 94 | 3 | 1.44 | 1.33 | 0.36 | 0.33 | 0.73 | 429 |
| 101 | 4   | 95  | 94 | 3 | 1.44 | 1.33 | 0.36 | 0.33 | 0.73 | 429 |
| 101 | 4   | 95  | 94 | 3 | 1.44 | 1.33 | 0.36 | 0.33 | 0.73 | 429 |
| 101 | 4   | 95  | 94 | 3 | 1.44 | 1.33 | 0.36 | 0.33 | 0.73 | 429 |
| 101 | 4   | 95  | 94 | 3 | 1.44 | 1.33 | 0.36 | 0.33 | 0.73 | 429 |
| 141 | 5.6 | 133 | 94 | 4 | 1.99 | 1.85 | 0.36 | 0.33 | 0.74 | 682 |
| 131 | 5.2 | 123 | 94 | 4 | 1.85 | 1.72 | 0.36 | 0.33 | 0.75 | 619 |
| 126 | 5.0 | 119 | 94 | 4 | 1.79 | 1.66 | 0.36 | 0.33 | 0.75 | 587 |

|     |     |     |    |   |      |      |      |      |      |     |
|-----|-----|-----|----|---|------|------|------|------|------|-----|
| 121 | 4.8 | 114 | 94 | 4 | 1.72 | 1.59 | 0.36 | 0.33 | 0.76 | 556 |
| 121 | 4.8 | 114 | 94 | 4 | 1.72 | 1.59 | 0.36 | 0.33 | 0.76 | 556 |
| 121 | 4.8 | 114 | 94 | 4 | 1.72 | 1.59 | 0.36 | 0.33 | 0.76 | 556 |
| 121 | 4.8 | 114 | 94 | 4 | 1.72 | 1.59 | 0.36 | 0.33 | 0.76 | 556 |
| 151 | 6   | 142 | 94 | 5 | 2.13 | 1.99 | 0.36 | 0.33 | 0.76 | 746 |
| 151 | 6   | 142 | 94 | 5 | 2.13 | 1.99 | 0.36 | 0.33 | 0.76 | 746 |
| 151 | 6   | 142 | 94 | 5 | 2.13 | 1.99 | 0.36 | 0.33 | 0.76 | 746 |
| 151 | 6   | 142 | 94 | 5 | 2.13 | 1.99 | 0.36 | 0.33 | 0.76 | 746 |
| 151 | 6   | 142 | 94 | 5 | 2.13 | 1.99 | 0.36 | 0.33 | 0.76 | 746 |
| 151 | 6   | 142 | 94 | 5 | 2.13 | 1.99 | 0.36 | 0.33 | 0.76 | 746 |
| 151 | 6   | 142 | 94 | 5 | 2.13 | 1.99 | 0.36 | 0.33 | 0.76 | 746 |
| 151 | 6   | 142 | 94 | 5 | 2.13 | 1.99 | 0.36 | 0.33 | 0.76 | 746 |
| 151 | 6   | 142 | 94 | 5 | 2.13 | 1.99 | 0.36 | 0.33 | 0.76 | 746 |
| 151 | 6   | 142 | 94 | 5 | 2.13 | 1.99 | 0.36 | 0.33 | 0.76 | 746 |
| 151 | 6   | 142 | 94 | 5 | 2.13 | 1.99 | 0.36 | 0.33 | 0.76 | 746 |
| 101 | 4   | 95  | 94 | 3 | 1.44 | 1.33 | 0.36 | 0.33 | 0.78 | 429 |
| 101 | 4   | 95  | 94 | 3 | 1.44 | 1.33 | 0.36 | 0.33 | 0.78 | 429 |
| 101 | 4   | 95  | 94 | 3 | 1.44 | 1.33 | 0.36 | 0.33 | 0.78 | 429 |
| 101 | 4   | 95  | 94 | 3 | 1.44 | 1.33 | 0.36 | 0.33 | 0.78 | 429 |
| 101 | 4.0 | 95  | 94 | 3 | 1.44 | 1.33 | 0.36 | 0.33 | 0.78 | 429 |
| 131 | 5.2 | 123 | 94 | 4 | 1.85 | 1.72 | 0.36 | 0.33 | 0.79 | 619 |
| 131 | 5.2 | 123 | 94 | 4 | 1.85 | 1.72 | 0.36 | 0.33 | 0.79 | 619 |
| 149 | 5.9 | 140 | 94 | 5 | 2.10 | 1.96 | 0.36 | 0.33 | 0.81 | 730 |
| 146 | 5.8 | 137 | 94 | 5 | 2.06 | 1.92 | 0.36 | 0.33 | 0.81 | 714 |
| 129 | 5.1 | 121 | 94 | 4 | 1.83 | 1.70 | 0.36 | 0.33 | 0.82 | 603 |
| 81  | 3.2 | 76  | 94 | 3 | 1.16 | 1.06 | 0.36 | 0.33 | 0.82 | 302 |
| 127 | 5   | 119 | 94 | 5 | 1.80 | 1.67 | 0.36 | 0.33 | 0.95 | 587 |
| 165 | 6.5 | 154 | 94 | 6 | 2.32 | 2.17 | 0.36 | 0.33 | 0.96 | 825 |

|     |     |     |    |   |      |      |      |      |      |     |
|-----|-----|-----|----|---|------|------|------|------|------|-----|
| 147 | 5.8 | 137 | 93 | 6 | 2.07 | 1.93 | 0.36 | 0.33 | 0.98 | 714 |
| 176 | 6.9 | 164 | 93 | 7 | 2.47 | 2.32 | 0.36 | 0.34 | 1.00 | 888 |
| 166 | 6.5 | 154 | 93 | 7 | 2.33 | 2.18 | 0.36 | 0.34 | 1.10 | 825 |
| 161 | 6.3 | 149 | 93 | 7 | 2.26 | 2.12 | 0.36 | 0.34 | 1.11 | 793 |
| 184 | 7.2 | 171 | 93 | 8 | 2.58 | 2.42 | 0.36 | 0.34 | 1.12 | 936 |
| 156 | 6.1 | 145 | 93 | 7 | 2.19 | 2.05 | 0.36 | 0.34 | 1.13 | 762 |
| 151 | 5.9 | 140 | 93 | 7 | 2.12 | 1.99 | 0.36 | 0.34 | 1.15 | 730 |
| 161 | 6.3 | 149 | 93 | 7 | 2.26 | 2.12 | 0.36 | 0.34 | 1.16 | 793 |
| 141 | 5.5 | 130 | 93 | 7 | 1.99 | 1.85 | 0.36 | 0.34 | 1.18 | 667 |
| 141 | 5.5 | 130 | 93 | 7 | 1.99 | 1.85 | 0.36 | 0.34 | 1.18 | 667 |
| 141 | 5.5 | 130 | 93 | 7 | 1.99 | 1.85 | 0.36 | 0.34 | 1.18 | 667 |
| 141 | 5.5 | 130 | 93 | 7 | 1.99 | 1.85 | 0.36 | 0.34 | 1.18 | 667 |
| 141 | 5.5 | 130 | 93 | 7 | 1.99 | 1.85 | 0.36 | 0.34 | 1.18 | 667 |
| 141 | 5.5 | 130 | 93 | 7 | 1.99 | 1.85 | 0.36 | 0.34 | 1.18 | 667 |
| 141 | 5.5 | 130 | 93 | 7 | 1.99 | 1.85 | 0.36 | 0.34 | 1.18 | 667 |
| 141 | 5.5 | 130 | 93 | 7 | 1.99 | 1.85 | 0.36 | 0.34 | 1.18 | 667 |
| 177 | 6.9 | 164 | 93 | 8 | 2.48 | 2.33 | 0.36 | 0.34 | 1.21 | 888 |
| 103 | 4   | 95  | 93 | 5 | 1.46 | 1.35 | 0.37 | 0.34 | 1.22 | 429 |
| 116 | 4.5 | 107 | 92 | 6 | 1.64 | 1.52 | 0.36 | 0.34 | 1.23 | 508 |
| 131 | 5.1 | 121 | 92 | 6 | 1.85 | 1.72 | 0.36 | 0.34 | 1.23 | 603 |
| 108 | 4.2 | 100 | 92 | 5 | 1.53 | 1.42 | 0.36 | 0.34 | 1.24 | 461 |
| 141 | 5.5 | 130 | 92 | 7 | 1.99 | 1.85 | 0.36 | 0.34 | 1.25 | 667 |
| 141 | 5.5 | 130 | 92 | 7 | 1.99 | 1.85 | 0.36 | 0.34 | 1.25 | 667 |
| 141 | 5.5 | 130 | 92 | 7 | 1.99 | 1.85 | 0.36 | 0.34 | 1.25 | 667 |
| 141 | 5.5 | 130 | 92 | 7 | 1.99 | 1.85 | 0.36 | 0.34 | 1.25 | 667 |
| 141 | 5.5 | 130 | 92 | 7 | 1.99 | 1.85 | 0.36 | 0.34 | 1.25 | 667 |
| 141 | 5.5 | 130 | 92 | 7 | 1.99 | 1.85 | 0.36 | 0.34 | 1.25 | 667 |



|     |     |     |    |    |      |      |      |      |      |      |
|-----|-----|-----|----|----|------|------|------|------|------|------|
| 141 | 5.5 | 130 | 92 | 7  | 1.99 | 1.85 | 0.36 | 0.34 | 1.25 | 667  |
| 141 | 5.5 | 130 | 92 | 7  | 1.99 | 1.85 | 0.36 | 0.34 | 1.25 | 667  |
| 141 | 5.5 | 130 | 92 | 7  | 1.99 | 1.85 | 0.36 | 0.34 | 1.25 | 667  |
| 141 | 5.5 | 130 | 92 | 7  | 1.99 | 1.85 | 0.36 | 0.34 | 1.25 | 667  |
| 141 | 5.5 | 130 | 92 | 7  | 1.99 | 1.85 | 0.36 | 0.34 | 1.25 | 667  |
| 154 | 6   | 142 | 92 | 8  | 2.17 | 2.03 | 0.36 | 0.34 | 1.25 | 746  |
| 193 | 7.5 | 178 | 92 | 9  | 2.70 | 2.54 | 0.36 | 0.34 | 1.26 | 983  |
| 121 | 4.7 | 111 | 92 | 6  | 1.71 | 1.59 | 0.36 | 0.34 | 1.28 | 540  |
| 116 | 4.5 | 107 | 92 | 6  | 1.64 | 1.52 | 0.36 | 0.34 | 1.31 | 508  |
| 111 | 4.3 | 102 | 92 | 6  | 1.57 | 1.46 | 0.37 | 0.34 | 1.32 | 477  |
| 111 | 4.3 | 102 | 92 | 6  | 1.57 | 1.46 | 0.37 | 0.34 | 1.32 | 477  |
| 186 | 7.2 | 171 | 92 | 10 | 2.60 | 2.45 | 0.36 | 0.34 | 1.34 | 936  |
| 181 | 7   | 166 | 92 | 10 | 2.53 | 2.38 | 0.36 | 0.34 | 1.40 | 904  |
| 181 | 7   | 166 | 92 | 10 | 2.53 | 2.38 | 0.36 | 0.34 | 1.41 | 904  |
| 181 | 7   | 166 | 92 | 10 | 2.53 | 2.38 | 0.36 | 0.34 | 1.41 | 904  |
| 181 | 7   | 166 | 92 | 10 | 2.53 | 2.38 | 0.36 | 0.34 | 1.41 | 904  |
| 181 | 7   | 166 | 92 | 10 | 2.53 | 2.38 | 0.36 | 0.34 | 1.41 | 904  |
| 181 | 7   | 166 | 92 | 10 | 2.53 | 2.38 | 0.36 | 0.34 | 1.41 | 904  |
| 117 | 4.5 | 107 | 92 | 7  | 1.65 | 1.54 | 0.37 | 0.34 | 1.45 | 508  |
| 241 | 9.3 | 220 | 92 | 14 | 3.36 | 3.17 | 0.36 | 0.34 | 1.48 | 1268 |
| 91  | 3.5 | 83  | 92 | 5  | 1.29 | 1.20 | 0.37 | 0.34 | 1.49 | 350  |
| 91  | 3.5 | 83  | 92 | 5  | 1.29 | 1.20 | 0.37 | 0.34 | 1.49 | 350  |
| 91  | 3.5 | 83  | 92 | 5  | 1.29 | 1.20 | 0.37 | 0.34 | 1.49 | 350  |
| 161 | 6.2 | 147 | 91 | 9  | 2.26 | 2.12 | 0.36 | 0.34 | 1.50 | 777  |
| 91  | 3.5 | 83  | 91 | 5  | 1.29 | 1.20 | 0.37 | 0.34 | 1.50 | 350  |
| 161 | 6.2 | 147 | 91 | 9  | 2.26 | 2.12 | 0.36 | 0.34 | 1.51 | 777  |
| 101 | 3.9 | 92  | 91 | 6  | 1.43 | 1.33 | 0.37 | 0.34 | 1.52 | 413  |

[illegible]

|     |     |     |    |    |      |      |      |      |      |      |
|-----|-----|-----|----|----|------|------|------|------|------|------|
| 131 | 5   | 119 | 91 | 8  | 1.84 | 1.72 | 0.37 | 0.34 | 1.63 | 587  |
| 131 | 5   | 119 | 91 | 8  | 1.84 | 1.72 | 0.37 | 0.34 | 1.63 | 587  |
| 131 | 5   | 119 | 91 | 8  | 1.84 | 1.72 | 0.37 | 0.34 | 1.63 | 587  |
| 131 | 5   | 119 | 91 | 8  | 1.84 | 1.72 | 0.37 | 0.34 | 1.63 | 587  |
| 131 | 5   | 119 | 91 | 8  | 1.84 | 1.72 | 0.37 | 0.34 | 1.63 | 587  |
| 131 | 5   | 119 | 91 | 8  | 1.84 | 1.72 | 0.37 | 0.34 | 1.63 | 587  |
| 131 | 5   | 119 | 91 | 8  | 1.84 | 1.72 | 0.37 | 0.34 | 1.63 | 587  |
| 131 | 5   | 119 | 91 | 8  | 1.84 | 1.72 | 0.37 | 0.34 | 1.63 | 587  |
| 151 | 5.8 | 137 | 91 | 10 | 2.12 | 1.99 | 0.37 | 0.34 | 1.65 | 714  |
| 209 | 8.0 | 190 | 91 | 13 | 2.91 | 2.75 | 0.36 | 0.34 | 1.68 | 1062 |
| 126 | 4.8 | 114 | 91 | 8  | 1.77 | 1.66 | 0.37 | 0.35 | 1.72 | 556  |
| 131 | 5   | 119 | 91 | 9  | 1.84 | 1.72 | 0.37 | 0.34 | 1.73 | 587  |
| 131 | 5   | 119 | 91 | 9  | 1.84 | 1.72 | 0.37 | 0.34 | 1.73 | 587  |
| 131 | 5   | 119 | 91 | 9  | 1.84 | 1.72 | 0.37 | 0.34 | 1.73 | 587  |
| 131 | 5   | 119 | 91 | 9  | 1.84 | 1.72 | 0.37 | 0.34 | 1.73 | 587  |
| 131 | 5   | 119 | 91 | 9  | 1.84 | 1.72 | 0.37 | 0.34 | 1.73 | 587  |
| 131 | 5   | 119 | 91 | 9  | 1.84 | 1.72 | 0.37 | 0.34 | 1.73 | 587  |
| 131 | 5   | 119 | 91 | 9  | 1.84 | 1.72 | 0.37 | 0.34 | 1.73 | 587  |
| 131 | 5   | 119 | 91 | 9  | 1.84 | 1.72 | 0.37 | 0.34 | 1.73 | 587  |
| 131 | 5   | 119 | 91 | 9  | 1.84 | 1.72 | 0.37 | 0.34 | 1.73 | 587  |
| 131 | 5   | 119 | 91 | 9  | 1.84 | 1.72 | 0.37 | 0.34 | 1.73 | 587  |
| 131 | 5.0 | 119 | 91 | 9  | 1.84 | 1.72 | 0.37 | 0.34 | 1.73 | 587  |
| 131 | 5.0 | 119 | 91 | 9  | 1.84 | 1.72 | 0.37 | 0.34 | 1.73 | 587  |
| 131 | 5.0 | 119 | 91 | 9  | 1.84 | 1.72 | 0.37 | 0.34 | 1.73 | 587  |
| 131 | 5.0 | 119 | 91 | 9  | 1.84 | 1.72 | 0.37 | 0.34 | 1.73 | 587  |
| 131 | 5.0 | 119 | 91 | 9  | 1.84 | 1.72 | 0.37 | 0.34 | 1.73 | 587  |

|     |     |     |    |    |      |      |      |      |      |      |
|-----|-----|-----|----|----|------|------|------|------|------|------|
| 131 | 5.0 | 119 | 91 | 9  | 1.84 | 1.72 | 0.37 | 0.34 | 1.73 | 587  |
| 131 | 5.0 | 119 | 91 | 9  | 1.84 | 1.72 | 0.37 | 0.34 | 1.73 | 587  |
| 131 | 5.0 | 119 | 91 | 9  | 1.84 | 1.72 | 0.37 | 0.34 | 1.73 | 587  |
| 131 | 5.0 | 119 | 91 | 9  | 1.84 | 1.72 | 0.37 | 0.34 | 1.73 | 587  |
| 131 | 5.0 | 119 | 91 | 9  | 1.84 | 1.72 | 0.37 | 0.34 | 1.73 | 587  |
| 131 | 5.0 | 119 | 91 | 9  | 1.84 | 1.72 | 0.37 | 0.34 | 1.73 | 587  |
| 131 | 5.0 | 119 | 91 | 9  | 1.84 | 1.72 | 0.37 | 0.34 | 1.73 | 587  |
| 131 | 5.0 | 119 | 91 | 9  | 1.84 | 1.72 | 0.37 | 0.34 | 1.73 | 587  |
| 131 | 5.0 | 119 | 91 | 9  | 1.84 | 1.72 | 0.37 | 0.34 | 1.73 | 587  |
| 131 | 5.0 | 119 | 91 | 9  | 1.84 | 1.72 | 0.37 | 0.34 | 1.73 | 587  |
| 131 | 5.0 | 119 | 91 | 9  | 1.84 | 1.72 | 0.37 | 0.34 | 1.73 | 587  |
| 136 | 5.2 | 123 | 91 | 9  | 1.91 | 1.79 | 0.37 | 0.34 | 1.73 | 619  |
| 157 | 6   | 142 | 91 | 10 | 2.20 | 2.06 | 0.37 | 0.34 | 1.74 | 746  |
| 79  | 3   | 71  | 90 | 5  | 1.12 | 1.04 | 0.37 | 0.35 | 1.81 | 271  |
| 79  | 3   | 71  | 90 | 5  | 1.12 | 1.04 | 0.37 | 0.35 | 1.81 | 271  |
| 79  | 3.0 | 71  | 90 | 5  | 1.12 | 1.04 | 0.37 | 0.35 | 1.81 | 271  |
| 121 | 4.6 | 109 | 90 | 8  | 1.70 | 1.59 | 0.37 | 0.35 | 1.83 | 524  |
| 171 | 6.5 | 154 | 90 | 12 | 2.39 | 2.25 | 0.37 | 0.35 | 1.85 | 825  |
| 171 | 6.5 | 154 | 90 | 12 | 2.39 | 2.25 | 0.37 | 0.35 | 1.85 | 825  |
| 171 | 6.5 | 154 | 90 | 12 | 2.39 | 2.25 | 0.37 | 0.35 | 1.85 | 825  |
| 171 | 6.5 | 154 | 90 | 12 | 2.39 | 2.25 | 0.37 | 0.35 | 1.86 | 825  |
| 171 | 6.5 | 154 | 90 | 12 | 2.39 | 2.25 | 0.37 | 0.35 | 1.86 | 825  |
| 171 | 6.5 | 154 | 90 | 12 | 2.39 | 2.25 | 0.37 | 0.35 | 1.86 | 825  |
| 79  | 3   | 71  | 90 | 6  | 1.12 | 1.04 | 0.37 | 0.35 | 1.85 | 271  |
| 179 | 6.8 | 161 | 90 | 13 | 2.50 | 2.35 | 0.37 | 0.35 | 1.87 | 872  |
| 211 | 8   | 190 | 90 | 15 | 2.94 | 2.78 | 0.37 | 0.35 | 1.87 | 1062 |
| 106 | 4   | 95  | 90 | 8  | 1.49 | 1.39 | 0.37 | 0.35 | 2.00 | 429  |

|     |     |     |    |    |      |      |      |      |      |     |
|-----|-----|-----|----|----|------|------|------|------|------|-----|
| 151 | 5.7 | 135 | 90 | 12 | 2.11 | 1.99 | 0.37 | 0.35 | 2.02 | 698 |
| 146 | 5.5 | 130 | 89 | 11 | 2.04 | 1.92 | 0.37 | 0.35 | 2.07 | 667 |
| 146 | 5.5 | 130 | 89 | 11 | 2.04 | 1.92 | 0.37 | 0.35 | 2.07 | 667 |
| 146 | 5.5 | 130 | 89 | 11 | 2.04 | 1.92 | 0.37 | 0.35 | 2.07 | 667 |
| 101 | 3.8 | 90  | 89 | 8  | 1.42 | 1.33 | 0.37 | 0.35 | 2.09 | 397 |
| 186 | 7   | 166 | 89 | 15 | 2.59 | 2.45 | 0.37 | 0.35 | 2.11 | 904 |
| 146 | 5.5 | 130 | 89 | 12 | 2.04 | 1.92 | 0.37 | 0.35 | 2.13 | 667 |
| 146 | 5.5 | 130 | 89 | 12 | 2.04 | 1.92 | 0.37 | 0.35 | 2.13 | 667 |
| 146 | 5.5 | 130 | 89 | 12 | 2.04 | 1.92 | 0.37 | 0.35 | 2.13 | 667 |
| 173 | 6.5 | 154 | 89 | 14 | 2.41 | 2.28 | 0.37 | 0.35 | 2.16 | 825 |
| 187 | 7   | 166 | 89 | 16 | 2.60 | 2.46 | 0.37 | 0.35 | 2.25 | 904 |
| 131 | 4.9 | 116 | 89 | 11 | 1.83 | 1.72 | 0.37 | 0.35 | 2.25 | 572 |
| 107 | 4.0 | 95  | 89 | 9  | 1.50 | 1.41 | 0.38 | 0.35 | 2.25 | 429 |
| 166 | 6.2 | 147 | 89 | 14 | 2.31 | 2.18 | 0.37 | 0.35 | 2.30 | 777 |
| 121 | 4.5 | 107 | 89 | 10 | 1.69 | 1.59 | 0.38 | 0.35 | 2.31 | 508 |
| 121 | 4.5 | 107 | 89 | 10 | 1.69 | 1.59 | 0.38 | 0.35 | 2.31 | 508 |
| 121 | 4.5 | 107 | 89 | 10 | 1.69 | 1.59 | 0.38 | 0.35 | 2.31 | 508 |
| 147 | 5.5 | 130 | 89 | 13 | 2.05 | 1.93 | 0.37 | 0.35 | 2.31 | 667 |
| 161 | 6   | 142 | 88 | 14 | 2.24 | 2.12 | 0.37 | 0.35 | 2.36 | 746 |
| 161 | 6   | 142 | 88 | 14 | 2.24 | 2.12 | 0.37 | 0.35 | 2.36 | 746 |
| 161 | 6.0 | 142 | 88 | 14 | 2.24 | 2.12 | 0.37 | 0.35 | 2.36 | 746 |
| 161 | 6.0 | 142 | 88 | 14 | 2.24 | 2.12 | 0.37 | 0.35 | 2.36 | 746 |
| 161 | 6.0 | 142 | 88 | 14 | 2.24 | 2.12 | 0.37 | 0.35 | 2.36 | 746 |
| 161 | 6.0 | 142 | 88 | 14 | 2.24 | 2.12 | 0.37 | 0.35 | 2.36 | 746 |
| 161 | 6.0 | 142 | 88 | 14 | 2.24 | 2.12 | 0.37 | 0.35 | 2.36 | 746 |
| 161 | 6.0 | 142 | 88 | 14 | 2.24 | 2.12 | 0.37 | 0.35 | 2.36 | 746 |
| 161 | 6.0 | 142 | 88 | 14 | 2.24 | 2.12 | 0.37 | 0.35 | 2.36 | 746 |
| 161 | 6.0 | 142 | 88 | 14 | 2.24 | 2.12 | 0.37 | 0.35 | 2.36 | 746 |

|     |     |     |    |    |      |      |      |      |      |      |
|-----|-----|-----|----|----|------|------|------|------|------|------|
| 161 | 6.0 | 142 | 88 | 14 | 2.24 | 2.12 | 0.37 | 0.35 | 2.36 | 746  |
| 153 | 5.7 | 135 | 88 | 13 | 2.13 | 2.01 | 0.37 | 0.35 | 2.36 | 698  |
| 161 | 6   | 142 | 88 | 14 | 2.24 | 2.12 | 0.37 | 0.35 | 2.39 | 746  |
| 161 | 6   | 142 | 88 | 14 | 2.24 | 2.12 | 0.37 | 0.35 | 2.39 | 746  |
| 161 | 6   | 142 | 88 | 14 | 2.24 | 2.12 | 0.37 | 0.35 | 2.39 | 746  |
| 161 | 6   | 142 | 88 | 14 | 2.24 | 2.12 | 0.37 | 0.35 | 2.39 | 746  |
| 161 | 6   | 142 | 88 | 14 | 2.24 | 2.12 | 0.37 | 0.35 | 2.39 | 746  |
| 161 | 6   | 142 | 88 | 14 | 2.24 | 2.12 | 0.37 | 0.35 | 2.39 | 746  |
| 161 | 6   | 142 | 88 | 14 | 2.24 | 2.12 | 0.37 | 0.35 | 2.39 | 746  |
| 161 | 6   | 142 | 88 | 14 | 2.24 | 2.12 | 0.37 | 0.35 | 2.39 | 746  |
| 121 | 4.5 | 107 | 88 | 11 | 1.69 | 1.59 | 0.38 | 0.35 | 2.39 | 508  |
| 121 | 4.5 | 107 | 88 | 11 | 1.69 | 1.59 | 0.38 | 0.35 | 2.39 | 508  |
| 148 | 5.5 | 130 | 88 | 13 | 2.06 | 1.95 | 0.38 | 0.35 | 2.43 | 667  |
| 108 | 4   | 95  | 88 | 10 | 1.52 | 1.42 | 0.38 | 0.35 | 2.44 | 429  |
| 81  | 3   | 71  | 88 | 7  | 1.15 | 1.06 | 0.38 | 0.35 | 2.46 | 271  |
| 81  | 3   | 71  | 88 | 7  | 1.15 | 1.06 | 0.38 | 0.35 | 2.46 | 271  |
| 81  | 3.0 | 71  | 88 | 7  | 1.15 | 1.06 | 0.38 | 0.35 | 2.46 | 271  |
| 81  | 3.0 | 71  | 88 | 7  | 1.15 | 1.06 | 0.38 | 0.35 | 2.46 | 271  |
| 81  | 3.0 | 71  | 88 | 7  | 1.15 | 1.06 | 0.38 | 0.35 | 2.46 | 271  |
| 116 | 4.3 | 102 | 88 | 11 | 1.62 | 1.52 | 0.38 | 0.35 | 2.47 | 477  |
| 151 | 5.6 | 133 | 88 | 14 | 2.10 | 1.99 | 0.38 | 0.35 | 2.48 | 682  |
| 108 | 4   | 95  | 88 | 10 | 1.52 | 1.42 | 0.38 | 0.35 | 2.49 | 429  |
| 146 | 5.4 | 128 | 88 | 14 | 2.03 | 1.92 | 0.38 | 0.36 | 2.55 | 651  |
| 136 | 5   | 119 | 88 | 13 | 1.90 | 1.79 | 0.38 | 0.36 | 2.60 | 587  |
| 149 | 5.5 | 130 | 88 | 14 | 2.07 | 1.96 | 0.38 | 0.36 | 2.60 | 667  |
| 149 | 5.5 | 130 | 88 | 14 | 2.07 | 1.96 | 0.38 | 0.36 | 2.60 | 667  |
| 208 | 7.7 | 182 | 88 | 20 | 2.88 | 2.74 | 0.37 | 0.36 | 2.61 | 1015 |

|     |     |     |    |    |      |      |      |      |      |      |
|-----|-----|-----|----|----|------|------|------|------|------|------|
| 111 | 4.1 | 97  | 88 | 11 | 1.56 | 1.46 | 0.38 | 0.36 | 2.61 | 445  |
| 111 | 4.1 | 97  | 88 | 11 | 1.56 | 1.46 | 0.38 | 0.36 | 2.61 | 445  |
| 119 | 4.4 | 104 | 88 | 11 | 1.66 | 1.56 | 0.38 | 0.36 | 2.61 | 492  |
| 141 | 5.2 | 123 | 88 | 14 | 1.96 | 1.85 | 0.38 | 0.36 | 2.62 | 619  |
| 157 | 5.8 | 137 | 87 | 15 | 2.18 | 2.06 | 0.38 | 0.36 | 2.66 | 714  |
| 141 | 5.2 | 123 | 87 | 14 | 1.96 | 1.85 | 0.38 | 0.36 | 2.67 | 619  |
| 136 | 5.0 | 119 | 87 | 14 | 1.90 | 1.79 | 0.38 | 0.36 | 2.70 | 587  |
| 136 | 5.0 | 119 | 87 | 14 | 1.90 | 1.79 | 0.38 | 0.36 | 2.70 | 587  |
| 136 | 5.0 | 119 | 87 | 14 | 1.90 | 1.79 | 0.38 | 0.36 | 2.70 | 587  |
| 136 | 5.0 | 119 | 87 | 14 | 1.90 | 1.79 | 0.38 | 0.36 | 2.70 | 587  |
| 136 | 5.0 | 119 | 87 | 14 | 1.90 | 1.79 | 0.38 | 0.36 | 2.70 | 587  |
| 231 | 8.5 | 201 | 87 | 23 | 3.19 | 3.04 | 0.38 | 0.36 | 2.71 | 1142 |
| 231 | 8.5 | 201 | 87 | 23 | 3.19 | 3.04 | 0.38 | 0.36 | 2.71 | 1142 |
| 131 | 4.8 | 114 | 87 | 13 | 1.83 | 1.72 | 0.38 | 0.36 | 2.74 | 556  |
| 131 | 4.8 | 114 | 87 | 13 | 1.83 | 1.72 | 0.38 | 0.36 | 2.74 | 556  |
| 131 | 4.8 | 114 | 87 | 13 | 1.83 | 1.72 | 0.38 | 0.36 | 2.74 | 556  |
| 137 | 5   | 119 | 87 | 14 | 1.91 | 1.80 | 0.38 | 0.36 | 2.80 | 587  |
| 191 | 7   | 166 | 87 | 20 | 2.64 | 2.51 | 0.38 | 0.36 | 2.79 | 904  |
| 191 | 7   | 166 | 87 | 20 | 2.64 | 2.51 | 0.38 | 0.36 | 2.79 | 904  |
| 191 | 7   | 166 | 87 | 20 | 2.64 | 2.51 | 0.38 | 0.36 | 2.79 | 904  |
| 131 | 4.8 | 114 | 87 | 13 | 1.83 | 1.72 | 0.38 | 0.36 | 2.79 | 556  |
| 131 | 4.8 | 114 | 87 | 13 | 1.83 | 1.72 | 0.38 | 0.36 | 2.79 | 556  |
| 131 | 4.8 | 114 | 87 | 13 | 1.83 | 1.72 | 0.38 | 0.36 | 2.79 | 556  |
| 131 | 4.8 | 114 | 87 | 13 | 1.83 | 1.72 | 0.38 | 0.36 | 2.79 | 556  |
| 131 | 4.8 | 114 | 87 | 13 | 1.83 | 1.72 | 0.38 | 0.36 | 2.79 | 556  |
| 191 | 7   | 166 | 87 | 20 | 2.64 | 2.51 | 0.38 | 0.36 | 2.81 | 904  |
| 191 | 7.0 | 166 | 87 | 20 | 2.64 | 2.51 | 0.38 | 0.36 | 2.81 | 904  |

|     |     |     |    |    |      |      |      |      |      |      |
|-----|-----|-----|----|----|------|------|------|------|------|------|
| 96  | 3.5 | 83  | 87 | 10 | 1.35 | 1.26 | 0.38 | 0.36 | 2.88 | 350  |
| 137 | 5.0 | 119 | 87 | 14 | 1.91 | 1.80 | 0.38 | 0.36 | 2.90 | 587  |
| 151 | 5.5 | 130 | 86 | 16 | 2.10 | 1.99 | 0.38 | 0.36 | 2.96 | 667  |
| 151 | 5.5 | 130 | 86 | 16 | 2.10 | 1.99 | 0.38 | 0.36 | 2.96 | 667  |
| 165 | 6.0 | 142 | 86 | 18 | 2.29 | 2.17 | 0.38 | 0.36 | 3.01 | 746  |
| 221 | 8.0 | 191 | 86 | 24 | 3.05 | 2.91 | 0.38 | 0.36 | 3.02 | 1068 |
| 151 | 5.5 | 130 | 86 | 17 | 2.10 | 1.99 | 0.38 | 0.36 | 3.02 | 667  |
| 151 | 5.5 | 130 | 86 | 17 | 2.10 | 1.99 | 0.38 | 0.36 | 3.02 | 667  |
| 151 | 5.5 | 130 | 86 | 17 | 2.10 | 1.99 | 0.38 | 0.36 | 3.02 | 667  |
| 151 | 5.5 | 130 | 86 | 17 | 2.10 | 1.99 | 0.38 | 0.36 | 3.02 | 667  |
| 231 | 8.4 | 199 | 86 | 25 | 3.18 | 3.04 | 0.38 | 0.36 | 3.03 | 1126 |
| 179 | 6.5 | 154 | 86 | 20 | 2.48 | 2.35 | 0.38 | 0.36 | 3.06 | 825  |
| 111 | 4   | 95  | 86 | 13 | 1.55 | 1.46 | 0.39 | 0.36 | 3.17 | 429  |
| 111 | 4   | 95  | 86 | 13 | 1.55 | 1.46 | 0.39 | 0.36 | 3.17 | 429  |
| 111 | 4   | 95  | 86 | 13 | 1.55 | 1.46 | 0.39 | 0.36 | 3.17 | 429  |
| 111 | 4   | 95  | 86 | 13 | 1.55 | 1.46 | 0.39 | 0.36 | 3.17 | 429  |
| 111 | 4   | 95  | 86 | 13 | 1.55 | 1.46 | 0.39 | 0.36 | 3.17 | 429  |
| 111 | 4   | 95  | 86 | 13 | 1.55 | 1.46 | 0.39 | 0.36 | 3.17 | 429  |
| 111 | 4   | 95  | 86 | 13 | 1.55 | 1.46 | 0.39 | 0.36 | 3.17 | 429  |
| 111 | 4   | 95  | 86 | 13 | 1.55 | 1.46 | 0.39 | 0.36 | 3.17 | 429  |
| 111 | 4   | 95  | 86 | 13 | 1.55 | 1.46 | 0.39 | 0.36 | 3.17 | 429  |
| 111 | 4   | 95  | 86 | 13 | 1.55 | 1.46 | 0.39 | 0.36 | 3.17 | 429  |
| 111 | 4   | 95  | 86 | 13 | 1.55 | 1.46 | 0.39 | 0.36 | 3.17 | 429  |
| 111 | 4.0 | 95  | 86 | 13 | 1.55 | 1.46 | 0.39 | 0.36 | 3.22 | 429  |
| 111 | 4.0 | 95  | 86 | 13 | 1.55 | 1.46 | 0.39 | 0.36 | 3.22 | 429  |
| 161 | 5.8 | 137 | 86 | 19 | 2.23 | 2.12 | 0.38 | 0.37 | 3.26 | 714  |
| 211 | 7.6 | 180 | 85 | 25 | 2.91 | 2.78 | 0.38 | 0.37 | 3.29 | 999  |
| 181 | 6.5 | 154 | 85 | 22 | 2.50 | 2.38 | 0.38 | 0.37 | 3.35 | 825  |
| 181 | 6.5 | 154 | 85 | 22 | 2.50 | 2.38 | 0.38 | 0.37 | 3.35 | 825  |



|     |     |     |    |    |      |      |      |      |      |     |
|-----|-----|-----|----|----|------|------|------|------|------|-----|
| 181 | 6.5 | 154 | 85 | 22 | 2.50 | 2.38 | 0.38 | 0.37 | 3.35 | 825 |
| 181 | 6.5 | 154 | 85 | 22 | 2.50 | 2.38 | 0.38 | 0.37 | 3.35 | 825 |
| 131 | 4.7 | 111 | 85 | 16 | 1.82 | 1.72 | 0.39 | 0.37 | 3.36 | 540 |
| 181 | 6.5 | 154 | 85 | 22 | 2.50 | 2.38 | 0.38 | 0.37 | 3.36 | 825 |
| 167 | 6   | 142 | 85 | 20 | 2.31 | 2.20 | 0.38 | 0.37 | 3.37 | 746 |
| 171 | 6.1 | 145 | 85 | 21 | 2.36 | 2.25 | 0.39 | 0.37 | 3.46 | 762 |
| 176 | 6.3 | 149 | 85 | 22 | 2.43 | 2.32 | 0.39 | 0.37 | 3.49 | 793 |
| 168 | 6   | 142 | 85 | 21 | 2.32 | 2.21 | 0.39 | 0.37 | 3.50 | 746 |
| 168 | 6   | 142 | 85 | 21 | 2.32 | 2.21 | 0.39 | 0.37 | 3.53 | 746 |
| 146 | 5.2 | 123 | 85 | 19 | 2.02 | 1.92 | 0.39 | 0.37 | 3.56 | 619 |
| 141 | 5   | 119 | 85 | 18 | 1.95 | 1.85 | 0.39 | 0.37 | 3.58 | 587 |
| 141 | 5   | 119 | 85 | 18 | 1.95 | 1.85 | 0.39 | 0.37 | 3.58 | 587 |
| 141 | 5   | 119 | 85 | 18 | 1.95 | 1.85 | 0.39 | 0.37 | 3.58 | 587 |
| 141 | 5   | 119 | 85 | 18 | 1.95 | 1.85 | 0.39 | 0.37 | 3.58 | 587 |
| 141 | 5   | 119 | 85 | 18 | 1.95 | 1.85 | 0.39 | 0.37 | 3.58 | 587 |
| 141 | 5   | 119 | 85 | 18 | 1.95 | 1.85 | 0.39 | 0.37 | 3.58 | 587 |
| 121 | 4.3 | 102 | 85 | 15 | 1.68 | 1.59 | 0.39 | 0.37 | 3.59 | 477 |
| 121 | 4.3 | 102 | 85 | 15 | 1.68 | 1.59 | 0.39 | 0.37 | 3.59 | 477 |
| 121 | 4.3 | 102 | 84 | 16 | 1.68 | 1.59 | 0.39 | 0.37 | 3.61 | 477 |
| 113 | 4   | 95  | 84 | 15 | 1.57 | 1.48 | 0.39 | 0.37 | 3.66 | 429 |
| 141 | 5   | 119 | 84 | 18 | 1.95 | 1.85 | 0.39 | 0.37 | 3.68 | 587 |
| 141 | 5.0 | 119 | 84 | 18 | 1.95 | 1.85 | 0.39 | 0.37 | 3.68 | 587 |
| 141 | 5.0 | 119 | 84 | 18 | 1.95 | 1.85 | 0.39 | 0.37 | 3.68 | 587 |
| 141 | 5.0 | 119 | 84 | 18 | 1.95 | 1.85 | 0.39 | 0.37 | 3.68 | 587 |
| 141 | 5.0 | 119 | 84 | 18 | 1.95 | 1.85 | 0.39 | 0.37 | 3.68 | 587 |
| 141 | 5.0 | 119 | 84 | 18 | 1.95 | 1.85 | 0.39 | 0.37 | 3.68 | 587 |
| 141 | 5.0 | 119 | 84 | 18 | 1.95 | 1.85 | 0.39 | 0.37 | 3.68 | 587 |

|     |     |     |    |    |      |      |      |      |      |     |
|-----|-----|-----|----|----|------|------|------|------|------|-----|
| 141 | 5.0 | 119 | 84 | 18 | 1.95 | 1.85 | 0.39 | 0.37 | 3.68 | 587 |
| 141 | 5.0 | 119 | 84 | 18 | 1.95 | 1.85 | 0.39 | 0.37 | 3.68 | 587 |
| 141 | 5.0 | 119 | 84 | 18 | 1.95 | 1.85 | 0.39 | 0.37 | 3.68 | 587 |
| 141 | 5.0 | 119 | 84 | 18 | 1.95 | 1.85 | 0.39 | 0.37 | 3.68 | 587 |
| 141 | 5.0 | 119 | 84 | 18 | 1.95 | 1.85 | 0.39 | 0.37 | 3.68 | 587 |
| 141 | 5.0 | 119 | 84 | 18 | 1.95 | 1.85 | 0.39 | 0.37 | 3.68 | 587 |
| 169 | 6   | 142 | 84 | 22 | 2.33 | 2.22 | 0.39 | 0.37 | 3.69 | 746 |
| 155 | 5.5 | 130 | 84 | 21 | 2.14 | 2.04 | 0.39 | 0.37 | 3.73 | 667 |
| 181 | 6.4 | 152 | 84 | 24 | 2.49 | 2.38 | 0.39 | 0.37 | 3.77 | 809 |
| 176 | 6.2 | 147 | 84 | 24 | 2.42 | 2.32 | 0.39 | 0.37 | 3.87 | 777 |
| 156 | 5.5 | 130 | 83 | 21 | 2.15 | 2.05 | 0.39 | 0.37 | 3.91 | 667 |
| 131 | 4.6 | 109 | 83 | 18 | 1.81 | 1.72 | 0.39 | 0.37 | 3.94 | 524 |
| 151 | 5.3 | 126 | 83 | 21 | 2.08 | 1.99 | 0.39 | 0.37 | 3.97 | 635 |
| 151 | 5.3 | 126 | 83 | 21 | 2.08 | 1.99 | 0.39 | 0.37 | 3.97 | 635 |
| 171 | 6   | 142 | 83 | 24 | 2.35 | 2.25 | 0.39 | 0.37 | 3.98 | 746 |
| 171 | 6   | 142 | 83 | 24 | 2.35 | 2.25 | 0.39 | 0.37 | 3.98 | 746 |
| 171 | 6.0 | 142 | 83 | 24 | 2.35 | 2.25 | 0.39 | 0.37 | 3.98 | 746 |
| 171 | 6.0 | 142 | 83 | 24 | 2.35 | 2.25 | 0.39 | 0.37 | 3.98 | 746 |
| 171 | 6.0 | 142 | 83 | 24 | 2.35 | 2.25 | 0.39 | 0.37 | 3.98 | 746 |
| 171 | 6.0 | 142 | 83 | 24 | 2.35 | 2.25 | 0.39 | 0.37 | 3.98 | 746 |
| 171 | 6.0 | 142 | 83 | 24 | 2.35 | 2.25 | 0.39 | 0.37 | 3.98 | 746 |
| 171 | 6.0 | 142 | 83 | 24 | 2.35 | 2.25 | 0.39 | 0.37 | 3.98 | 746 |
| 191 | 6.7 | 159 | 83 | 27 | 2.62 | 2.51 | 0.39 | 0.38 | 4.00 | 857 |
| 171 | 6   | 142 | 83 | 24 | 2.35 | 2.25 | 0.39 | 0.37 | 4.02 | 746 |
| 171 | 6   | 142 | 83 | 24 | 2.35 | 2.25 | 0.39 | 0.37 | 4.02 | 746 |
| 171 | 6   | 142 | 83 | 24 | 2.35 | 2.25 | 0.39 | 0.37 | 4.02 | 746 |
| 146 | 5.1 | 121 | 83 | 21 | 2.01 | 1.92 | 0.39 | 0.38 | 4.07 | 603 |

|     |     |     |    |    |      |      |      |      |      |      |
|-----|-----|-----|----|----|------|------|------|------|------|------|
| 121 | 4.2 | 100 | 83 | 17 | 1.67 | 1.59 | 0.40 | 0.38 | 4.15 | 461  |
| 121 | 4.2 | 100 | 83 | 17 | 1.67 | 1.59 | 0.40 | 0.38 | 4.15 | 461  |
| 86  | 3   | 71  | 83 | 12 | 1.20 | 1.13 | 0.40 | 0.38 | 4.12 | 271  |
| 161 | 5.6 | 133 | 83 | 23 | 2.21 | 2.12 | 0.40 | 0.38 | 4.17 | 682  |
| 201 | 7   | 166 | 83 | 29 | 2.75 | 2.64 | 0.39 | 0.38 | 4.20 | 904  |
| 181 | 6.3 | 149 | 83 | 27 | 2.48 | 2.38 | 0.39 | 0.38 | 4.21 | 793  |
| 130 | 4.5 | 107 | 82 | 19 | 1.79 | 1.71 | 0.40 | 0.38 | 4.27 | 508  |
| 101 | 3.5 | 83  | 82 | 15 | 1.40 | 1.33 | 0.40 | 0.38 | 4.28 | 350  |
| 101 | 3.5 | 83  | 82 | 15 | 1.40 | 1.33 | 0.40 | 0.38 | 4.28 | 350  |
| 101 | 3.5 | 83  | 82 | 15 | 1.40 | 1.33 | 0.40 | 0.38 | 4.29 | 350  |
| 101 | 3.5 | 83  | 82 | 15 | 1.40 | 1.33 | 0.40 | 0.38 | 4.29 | 350  |
| 173 | 6   | 142 | 82 | 26 | 2.37 | 2.28 | 0.40 | 0.38 | 4.31 | 746  |
| 231 | 8.0 | 190 | 82 | 35 | 3.16 | 3.04 | 0.39 | 0.38 | 4.36 | 1062 |
| 116 | 4   | 95  | 82 | 18 | 1.60 | 1.52 | 0.40 | 0.38 | 4.39 | 429  |
| 116 | 4   | 95  | 82 | 18 | 1.60 | 1.52 | 0.40 | 0.38 | 4.39 | 429  |
| 116 | 4   | 95  | 82 | 18 | 1.60 | 1.52 | 0.40 | 0.38 | 4.39 | 429  |
| 116 | 4   | 95  | 82 | 18 | 1.60 | 1.52 | 0.40 | 0.38 | 4.44 | 429  |
| 131 | 4.5 | 107 | 82 | 20 | 1.80 | 1.72 | 0.40 | 0.38 | 4.48 | 508  |
| 131 | 4.5 | 107 | 82 | 20 | 1.80 | 1.72 | 0.40 | 0.38 | 4.48 | 508  |
| 131 | 4.5 | 107 | 82 | 20 | 1.80 | 1.72 | 0.40 | 0.38 | 4.48 | 508  |
| 131 | 4.5 | 107 | 82 | 20 | 1.80 | 1.72 | 0.40 | 0.38 | 4.48 | 508  |
| 151 | 5.2 | 123 | 82 | 23 | 2.07 | 1.99 | 0.40 | 0.38 | 4.50 | 619  |
| 146 | 5   | 119 | 82 | 23 | 2.01 | 1.92 | 0.40 | 0.38 | 4.56 | 587  |
| 160 | 5.5 | 130 | 82 | 25 | 2.20 | 2.10 | 0.40 | 0.38 | 4.55 | 667  |
| 131 | 4.5 | 107 | 82 | 21 | 1.80 | 1.72 | 0.40 | 0.38 | 4.56 | 508  |
| 131 | 4.5 | 107 | 82 | 21 | 1.80 | 1.72 | 0.40 | 0.38 | 4.56 | 508  |
| 131 | 4.5 | 107 | 82 | 21 | 1.80 | 1.72 | 0.40 | 0.38 | 4.56 | 508  |

|     |     |     |    |    |      |      |      |      |      |     |
|-----|-----|-----|----|----|------|------|------|------|------|-----|
| 131 | 4.5 | 107 | 82 | 21 | 1.80 | 1.72 | 0.40 | 0.38 | 4.56 | 508 |
| 131 | 4.5 | 107 | 82 | 21 | 1.80 | 1.72 | 0.40 | 0.38 | 4.56 | 508 |
| 131 | 4.5 | 107 | 82 | 21 | 1.80 | 1.72 | 0.40 | 0.38 | 4.56 | 508 |
| 131 | 4.5 | 107 | 82 | 21 | 1.80 | 1.72 | 0.40 | 0.38 | 4.56 | 508 |
| 131 | 4.5 | 107 | 82 | 21 | 1.80 | 1.72 | 0.40 | 0.38 | 4.56 | 508 |
| 131 | 4.5 | 107 | 82 | 21 | 1.80 | 1.72 | 0.40 | 0.38 | 4.56 | 508 |
| 131 | 4.5 | 107 | 82 | 21 | 1.80 | 1.72 | 0.40 | 0.38 | 4.56 | 508 |
| 131 | 4.5 | 107 | 82 | 21 | 1.80 | 1.72 | 0.40 | 0.38 | 4.56 | 508 |
| 131 | 4.5 | 107 | 82 | 21 | 1.80 | 1.72 | 0.40 | 0.38 | 4.56 | 508 |
| 131 | 4.5 | 107 | 82 | 21 | 1.80 | 1.72 | 0.40 | 0.38 | 4.56 | 508 |
| 146 | 5   | 119 | 81 | 23 | 2.01 | 1.92 | 0.40 | 0.38 | 4.66 | 587 |
| 146 | 5.0 | 119 | 81 | 23 | 2.01 | 1.92 | 0.40 | 0.38 | 4.66 | 587 |
| 181 | 6.2 | 147 | 81 | 29 | 2.48 | 2.38 | 0.40 | 0.38 | 4.66 | 777 |
| 149 | 5.1 | 121 | 81 | 24 | 2.05 | 1.96 | 0.40 | 0.38 | 4.67 | 603 |
| 126 | 4.3 | 102 | 81 | 20 | 1.73 | 1.66 | 0.40 | 0.39 | 4.72 | 477 |
| 147 | 5   | 119 | 81 | 24 | 2.02 | 1.93 | 0.40 | 0.39 | 4.75 | 587 |
| 161 | 5.5 | 130 | 81 | 26 | 2.21 | 2.12 | 0.40 | 0.38 | 4.73 | 667 |
| 161 | 5.5 | 130 | 81 | 26 | 2.21 | 2.12 | 0.40 | 0.38 | 4.73 | 667 |
| 161 | 5.5 | 130 | 81 | 26 | 2.21 | 2.12 | 0.40 | 0.38 | 4.73 | 667 |
| 173 | 5.9 | 140 | 81 | 28 | 2.37 | 2.28 | 0.40 | 0.39 | 4.76 | 730 |
| 176 | 6   | 142 | 81 | 29 | 2.41 | 2.32 | 0.40 | 0.39 | 4.80 | 746 |
| 141 | 4.8 | 114 | 81 | 23 | 1.94 | 1.85 | 0.40 | 0.39 | 4.82 | 556 |
| 141 | 4.8 | 114 | 81 | 23 | 1.94 | 1.85 | 0.40 | 0.39 | 4.82 | 556 |
| 141 | 4.8 | 114 | 81 | 23 | 1.94 | 1.85 | 0.40 | 0.39 | 4.82 | 556 |
| 176 | 6   | 142 | 81 | 29 | 2.41 | 2.32 | 0.40 | 0.39 | 4.83 | 746 |
| 191 | 6.5 | 154 | 81 | 32 | 2.61 | 2.51 | 0.40 | 0.39 | 4.85 | 825 |
| 191 | 6.5 | 154 | 81 | 32 | 2.61 | 2.51 | 0.40 | 0.39 | 4.85 | 825 |

|     |     |     |    |    |      |      |      |      |      |      |
|-----|-----|-----|----|----|------|------|------|------|------|------|
| 191 | 6.5 | 154 | 81 | 32 | 2.61 | 2.51 | 0.40 | 0.39 | 4.85 | 825  |
| 147 | 5.0 | 119 | 81 | 24 | 2.02 | 1.93 | 0.40 | 0.39 | 4.85 | 587  |
| 191 | 6.5 | 154 | 81 | 32 | 2.61 | 2.51 | 0.40 | 0.39 | 4.86 | 825  |
| 106 | 3.6 | 85  | 80 | 18 | 1.46 | 1.39 | 0.41 | 0.39 | 4.96 | 366  |
| 121 | 4.1 | 97  | 80 | 20 | 1.67 | 1.59 | 0.41 | 0.39 | 4.99 | 445  |
| 251 | 8.5 | 201 | 80 | 43 | 3.41 | 3.30 | 0.40 | 0.39 | 5.00 | 1142 |
| 171 | 5.8 | 137 | 80 | 29 | 2.34 | 2.25 | 0.40 | 0.39 | 5.02 | 714  |
| 171 | 5.8 | 137 | 80 | 29 | 2.34 | 2.25 | 0.40 | 0.39 | 5.02 | 714  |
| 151 | 5.1 | 121 | 80 | 26 | 2.07 | 1.99 | 0.41 | 0.39 | 5.05 | 603  |
| 149 | 5   | 119 | 80 | 26 | 2.04 | 1.96 | 0.41 | 0.39 | 5.14 | 587  |
| 193 | 6.5 | 154 | 80 | 33 | 2.63 | 2.54 | 0.40 | 0.39 | 5.15 | 825  |
| 119 | 4.0 | 95  | 80 | 21 | 1.64 | 1.56 | 0.41 | 0.39 | 5.17 | 429  |
| 161 | 5.4 | 128 | 80 | 28 | 2.20 | 2.12 | 0.41 | 0.39 | 5.26 | 651  |
| 161 | 5.4 | 128 | 80 | 28 | 2.20 | 2.12 | 0.41 | 0.39 | 5.26 | 651  |
| 161 | 5.4 | 128 | 80 | 28 | 2.20 | 2.12 | 0.41 | 0.39 | 5.26 | 651  |
| 161 | 5.4 | 128 | 80 | 28 | 2.20 | 2.12 | 0.41 | 0.39 | 5.26 | 651  |
| 126 | 4.2 | 100 | 80 | 22 | 1.73 | 1.66 | 0.41 | 0.39 | 5.31 | 461  |
| 116 | 3.9 | 92  | 80 | 21 | 1.60 | 1.52 | 0.41 | 0.39 | 5.28 | 413  |
| 150 | 5   | 119 | 79 | 27 | 2.05 | 1.97 | 0.41 | 0.39 | 5.34 | 587  |
| 120 | 4   | 95  | 79 | 22 | 1.65 | 1.58 | 0.41 | 0.39 | 5.42 | 429  |
| 216 | 7.2 | 171 | 79 | 39 | 2.93 | 2.84 | 0.41 | 0.39 | 5.46 | 936  |
| 151 | 5   | 119 | 79 | 28 | 2.06 | 1.99 | 0.41 | 0.40 | 5.53 | 587  |
| 151 | 5   | 119 | 79 | 28 | 2.06 | 1.99 | 0.41 | 0.40 | 5.53 | 587  |
| 151 | 5   | 119 | 79 | 28 | 2.06 | 1.99 | 0.41 | 0.40 | 5.53 | 587  |
| 151 | 5   | 119 | 79 | 28 | 2.06 | 1.99 | 0.41 | 0.40 | 5.53 | 587  |
| 211 | 7   | 166 | 79 | 39 | 2.86 | 2.78 | 0.41 | 0.40 | 5.59 | 904  |
| 211 | 7.0 | 166 | 79 | 39 | 2.86 | 2.78 | 0.41 | 0.40 | 5.59 | 904  |

|     |     |     |    |    |      |      |      |      |      |     |
|-----|-----|-----|----|----|------|------|------|------|------|-----|
| 181 | 6   | 142 | 79 | 34 | 2.46 | 2.38 | 0.41 | 0.40 | 5.61 | 746 |
| 181 | 6.0 | 142 | 79 | 34 | 2.46 | 2.38 | 0.41 | 0.40 | 5.61 | 746 |
| 181 | 6.0 | 142 | 79 | 34 | 2.46 | 2.38 | 0.41 | 0.40 | 5.61 | 746 |
| 181 | 6.0 | 142 | 79 | 34 | 2.46 | 2.38 | 0.41 | 0.40 | 5.61 | 746 |
| 181 | 6.0 | 142 | 79 | 34 | 2.46 | 2.38 | 0.41 | 0.40 | 5.61 | 746 |
| 166 | 5.5 | 130 | 79 | 31 | 2.26 | 2.18 | 0.41 | 0.40 | 5.62 | 667 |
| 151 | 5   | 119 | 79 | 28 | 2.06 | 1.99 | 0.41 | 0.40 | 5.63 | 587 |
| 151 | 5.0 | 119 | 79 | 28 | 2.06 | 1.99 | 0.41 | 0.40 | 5.63 | 587 |
| 151 | 5.0 | 119 | 79 | 28 | 2.06 | 1.99 | 0.41 | 0.40 | 5.63 | 587 |
| 151 | 5.0 | 119 | 79 | 28 | 2.06 | 1.99 | 0.41 | 0.40 | 5.63 | 587 |
| 151 | 5.0 | 119 | 79 | 28 | 2.06 | 1.99 | 0.41 | 0.40 | 5.63 | 587 |
| 151 | 5.0 | 119 | 79 | 28 | 2.06 | 1.99 | 0.41 | 0.40 | 5.63 | 587 |
| 151 | 5.0 | 119 | 79 | 28 | 2.06 | 1.99 | 0.41 | 0.40 | 5.63 | 587 |
| 181 | 6   | 142 | 79 | 34 | 2.46 | 2.38 | 0.41 | 0.40 | 5.64 | 746 |
| 181 | 6   | 142 | 79 | 34 | 2.46 | 2.38 | 0.41 | 0.40 | 5.64 | 746 |
| 121 | 4   | 95  | 79 | 23 | 1.66 | 1.59 | 0.41 | 0.40 | 5.66 | 429 |
| 121 | 4.0 | 95  | 79 | 23 | 1.66 | 1.59 | 0.41 | 0.40 | 5.66 | 429 |
| 106 | 3.5 | 83  | 78 | 20 | 1.46 | 1.39 | 0.42 | 0.40 | 5.69 | 350 |
| 191 | 6.3 | 149 | 78 | 37 | 2.59 | 2.51 | 0.41 | 0.40 | 5.81 | 793 |
| 131 | 4.3 | 102 | 78 | 25 | 1.79 | 1.72 | 0.42 | 0.40 | 5.88 | 477 |
| 107 | 3.5 | 83  | 78 | 21 | 1.47 | 1.41 | 0.42 | 0.40 | 5.95 | 350 |
| 107 | 3.5 | 83  | 78 | 21 | 1.47 | 1.41 | 0.42 | 0.40 | 5.96 | 350 |
| 184 | 6   | 142 | 77 | 37 | 2.50 | 2.42 | 0.42 | 0.40 | 6.13 | 746 |
| 169 | 5.5 | 130 | 77 | 34 | 2.29 | 2.22 | 0.42 | 0.40 | 6.15 | 667 |
| 169 | 5.5 | 130 | 77 | 34 | 2.29 | 2.22 | 0.42 | 0.40 | 6.22 | 667 |
| 161 | 5.2 | 123 | 77 | 33 | 2.18 | 2.12 | 0.42 | 0.41 | 6.38 | 619 |
| 161 | 5.2 | 123 | 77 | 33 | 2.18 | 2.12 | 0.42 | 0.41 | 6.42 | 619 |

|     |     |     |    |    |      |      |      |      |      |      |
|-----|-----|-----|----|----|------|------|------|------|------|------|
| 131 | 4.2 | 100 | 77 | 27 | 1.78 | 1.72 | 0.42 | 0.41 | 6.48 | 461  |
| 131 | 4.2 | 100 | 77 | 27 | 1.78 | 1.72 | 0.42 | 0.41 | 6.48 | 461  |
| 171 | 5.5 | 130 | 76 | 36 | 2.32 | 2.25 | 0.42 | 0.41 | 6.51 | 667  |
| 171 | 5.5 | 130 | 76 | 36 | 2.32 | 2.25 | 0.42 | 0.41 | 6.51 | 667  |
| 171 | 5.5 | 130 | 76 | 36 | 2.32 | 2.25 | 0.42 | 0.41 | 6.51 | 667  |
| 171 | 5.5 | 130 | 76 | 36 | 2.32 | 2.25 | 0.42 | 0.41 | 6.51 | 667  |
| 131 | 4.2 | 100 | 76 | 28 | 1.78 | 1.72 | 0.42 | 0.41 | 6.58 | 461  |
| 171 | 5.5 | 130 | 76 | 36 | 2.32 | 2.25 | 0.42 | 0.41 | 6.57 | 667  |
| 141 | 4.5 | 107 | 76 | 30 | 1.91 | 1.85 | 0.43 | 0.41 | 6.65 | 508  |
| 141 | 4.5 | 107 | 76 | 30 | 1.91 | 1.85 | 0.43 | 0.41 | 6.65 | 508  |
| 141 | 4.5 | 107 | 76 | 30 | 1.91 | 1.85 | 0.43 | 0.41 | 6.65 | 508  |
| 141 | 4.5 | 107 | 76 | 30 | 1.91 | 1.85 | 0.43 | 0.41 | 6.65 | 508  |
| 250 | 8.0 | 190 | 76 | 53 | 3.37 | 3.29 | 0.42 | 0.41 | 6.68 | 1062 |
| 181 | 5.8 | 137 | 76 | 39 | 2.45 | 2.38 | 0.42 | 0.41 | 6.70 | 714  |
| 141 | 4.5 | 107 | 76 | 30 | 1.91 | 1.85 | 0.43 | 0.41 | 6.73 | 508  |
| 141 | 4.5 | 107 | 76 | 30 | 1.91 | 1.85 | 0.43 | 0.41 | 6.73 | 508  |
| 141 | 4.5 | 107 | 76 | 30 | 1.91 | 1.85 | 0.43 | 0.41 | 6.73 | 508  |
| 141 | 4.5 | 107 | 76 | 30 | 1.91 | 1.85 | 0.43 | 0.41 | 6.73 | 508  |
| 157 | 5.0 | 119 | 76 | 34 | 2.13 | 2.06 | 0.43 | 0.41 | 6.80 | 587  |
| 223 | 7.1 | 168 | 76 | 48 | 3.00 | 2.93 | 0.42 | 0.41 | 6.83 | 920  |
| 186 | 5.9 | 140 | 75 | 41 | 2.51 | 2.45 | 0.43 | 0.41 | 6.93 | 730  |
| 79  | 2.5 | 59  | 75 | 17 | 1.09 | 1.04 | 0.44 | 0.41 | 6.93 | 192  |
| 221 | 7   | 166 | 75 | 49 | 2.97 | 2.91 | 0.42 | 0.42 | 6.97 | 904  |
| 111 | 3.5 | 83  | 75 | 25 | 1.51 | 1.46 | 0.43 | 0.42 | 7.07 | 350  |
| 111 | 3.5 | 83  | 75 | 25 | 1.51 | 1.46 | 0.43 | 0.42 | 7.07 | 350  |
| 111 | 3.5 | 83  | 75 | 25 | 1.51 | 1.46 | 0.43 | 0.42 | 7.07 | 350  |
| 111 | 3.5 | 83  | 75 | 25 | 1.51 | 1.46 | 0.43 | 0.42 | 7.07 | 350  |

|     |     |     |    |    |      |      |      |      |      |     |
|-----|-----|-----|----|----|------|------|------|------|------|-----|
| 111 | 3.5 | 83  | 75 | 25 | 1.51 | 1.46 | 0.43 | 0.42 | 7.08 | 350 |
| 111 | 3.5 | 83  | 75 | 25 | 1.51 | 1.46 | 0.43 | 0.42 | 7.08 | 350 |
| 111 | 3.5 | 83  | 75 | 25 | 1.51 | 1.46 | 0.43 | 0.42 | 7.08 | 350 |
| 159 | 5.0 | 119 | 75 | 36 | 2.15 | 2.09 | 0.43 | 0.42 | 7.19 | 587 |
| 191 | 6   | 142 | 75 | 43 | 2.57 | 2.51 | 0.43 | 0.42 | 7.24 | 746 |
| 191 | 6   | 142 | 75 | 43 | 2.57 | 2.51 | 0.43 | 0.42 | 7.24 | 746 |
| 191 | 6.0 | 142 | 75 | 43 | 2.57 | 2.51 | 0.43 | 0.42 | 7.24 | 746 |
| 191 | 6   | 142 | 74 | 44 | 2.57 | 2.51 | 0.43 | 0.42 | 7.27 | 746 |
| 191 | 6   | 142 | 74 | 44 | 2.57 | 2.51 | 0.43 | 0.42 | 7.27 | 746 |
| 161 | 5   | 119 | 74 | 37 | 2.17 | 2.12 | 0.43 | 0.42 | 7.48 | 587 |
| 241 | 7.5 | 178 | 74 | 56 | 3.23 | 3.17 | 0.43 | 0.42 | 7.51 | 983 |
| 129 | 4   | 95  | 74 | 30 | 1.75 | 1.70 | 0.44 | 0.42 | 7.56 | 429 |
| 161 | 5   | 119 | 74 | 38 | 2.17 | 2.12 | 0.43 | 0.42 | 7.58 | 587 |
| 161 | 5   | 119 | 74 | 38 | 2.17 | 2.12 | 0.43 | 0.42 | 7.58 | 587 |
| 161 | 5   | 119 | 74 | 38 | 2.17 | 2.12 | 0.43 | 0.42 | 7.58 | 587 |
| 161 | 5   | 119 | 74 | 38 | 2.17 | 2.12 | 0.43 | 0.42 | 7.58 | 587 |
| 161 | 5   | 119 | 74 | 38 | 2.17 | 2.12 | 0.43 | 0.42 | 7.58 | 587 |
| 161 | 5.0 | 119 | 74 | 38 | 2.17 | 2.12 | 0.43 | 0.42 | 7.58 | 587 |
| 161 | 5.0 | 119 | 74 | 38 | 2.17 | 2.12 | 0.43 | 0.42 | 7.58 | 587 |
| 161 | 5.0 | 119 | 74 | 38 | 2.17 | 2.12 | 0.43 | 0.42 | 7.58 | 587 |
| 161 | 5.0 | 119 | 74 | 38 | 2.17 | 2.12 | 0.43 | 0.42 | 7.58 | 587 |
| 161 | 5.0 | 119 | 74 | 38 | 2.17 | 2.12 | 0.43 | 0.42 | 7.58 | 587 |
| 161 | 5.0 | 119 | 74 | 38 | 2.17 | 2.12 | 0.43 | 0.42 | 7.58 | 587 |
| 161 | 5.0 | 119 | 74 | 38 | 2.17 | 2.12 | 0.43 | 0.42 | 7.58 | 587 |
| 161 | 5.0 | 119 | 74 | 38 | 2.17 | 2.12 | 0.43 | 0.42 | 7.58 | 587 |
| 161 | 5.0 | 119 | 74 | 38 | 2.17 | 2.12 | 0.43 | 0.42 | 7.58 | 587 |
| 113 | 3.5 | 83  | 74 | 27 | 1.53 | 1.48 | 0.44 | 0.42 | 7.62 | 350 |



|     |     |     |    |    |      |      |      |      |      |     |
|-----|-----|-----|----|----|------|------|------|------|------|-----|
| 113 | 3.5 | 83  | 74 | 27 | 1.53 | 1.48 | 0.44 | 0.42 | 7.62 | 350 |
| 181 | 5.6 | 133 | 73 | 43 | 2.43 | 2.38 | 0.43 | 0.43 | 7.71 | 682 |
| 210 | 6.5 | 154 | 73 | 50 | 2.82 | 2.76 | 0.43 | 0.43 | 7.71 | 825 |
| 123 | 3.8 | 90  | 73 | 29 | 1.67 | 1.62 | 0.44 | 0.43 | 7.73 | 397 |
| 178 | 5.5 | 130 | 73 | 43 | 2.39 | 2.34 | 0.44 | 0.43 | 7.75 | 667 |
| 178 | 5.5 | 130 | 73 | 43 | 2.39 | 2.34 | 0.44 | 0.43 | 7.75 | 667 |
| 211 | 6.5 | 154 | 73 | 51 | 2.83 | 2.78 | 0.44 | 0.43 | 7.85 | 825 |
| 130 | 4   | 95  | 73 | 31 | 1.76 | 1.71 | 0.44 | 0.43 | 7.86 | 429 |
| 121 | 3.7 | 88  | 73 | 29 | 1.64 | 1.59 | 0.44 | 0.43 | 7.97 | 382 |
| 121 | 3.7 | 88  | 73 | 29 | 1.64 | 1.59 | 0.44 | 0.43 | 7.97 | 382 |
| 131 | 4   | 95  | 73 | 32 | 1.77 | 1.72 | 0.44 | 0.43 | 8.05 | 429 |
| 131 | 4   | 95  | 73 | 32 | 1.77 | 1.72 | 0.44 | 0.43 | 8.05 | 429 |
| 131 | 4   | 95  | 73 | 32 | 1.77 | 1.72 | 0.44 | 0.43 | 8.05 | 429 |
| 131 | 4   | 95  | 73 | 32 | 1.77 | 1.72 | 0.44 | 0.43 | 8.05 | 429 |
| 131 | 4   | 95  | 73 | 32 | 1.77 | 1.72 | 0.44 | 0.43 | 8.10 | 429 |
| 131 | 4   | 95  | 73 | 32 | 1.77 | 1.72 | 0.44 | 0.43 | 8.10 | 429 |
| 131 | 4.0 | 95  | 73 | 32 | 1.77 | 1.72 | 0.44 | 0.43 | 8.10 | 429 |
| 131 | 4.0 | 95  | 73 | 32 | 1.77 | 1.72 | 0.44 | 0.43 | 8.10 | 429 |
| 177 | 5.4 | 128 | 72 | 44 | 2.37 | 2.33 | 0.44 | 0.43 | 8.15 | 651 |
| 115 | 3.5 | 83  | 72 | 29 | 1.56 | 1.51 | 0.44 | 0.43 | 8.20 | 350 |
| 181 | 5.5 | 130 | 72 | 46 | 2.43 | 2.38 | 0.44 | 0.43 | 8.28 | 667 |
| 181 | 5.5 | 130 | 72 | 46 | 2.43 | 2.38 | 0.44 | 0.43 | 8.34 | 667 |
| 231 | 7   | 166 | 72 | 59 | 3.08 | 3.04 | 0.44 | 0.43 | 8.38 | 904 |
| 231 | 7   | 166 | 72 | 59 | 3.08 | 3.04 | 0.44 | 0.43 | 8.38 | 904 |
| 116 | 3.5 | 83  | 72 | 30 | 1.57 | 1.52 | 0.45 | 0.44 | 8.46 | 350 |
| 116 | 3.5 | 83  | 72 | 30 | 1.57 | 1.52 | 0.45 | 0.44 | 8.47 | 350 |
| 126 | 3.8 | 90  | 72 | 32 | 1.70 | 1.66 | 0.45 | 0.44 | 8.50 | 397 |

|     |     |     |    |    |      |      |      |      |       |     |
|-----|-----|-----|----|----|------|------|------|------|-------|-----|
| 199 | 6.0 | 142 | 72 | 51 | 2.66 | 2.62 | 0.44 | 0.44 | 8.54  | 746 |
| 151 | 4.5 | 107 | 71 | 40 | 2.02 | 1.99 | 0.45 | 0.44 | 8.82  | 508 |
| 151 | 4.5 | 107 | 71 | 40 | 2.02 | 1.99 | 0.45 | 0.44 | 8.82  | 508 |
| 151 | 4.5 | 107 | 71 | 40 | 2.02 | 1.99 | 0.45 | 0.44 | 8.82  | 508 |
| 181 | 5.4 | 128 | 71 | 48 | 2.42 | 2.38 | 0.45 | 0.44 | 8.87  | 651 |
| 181 | 5.4 | 128 | 71 | 48 | 2.42 | 2.38 | 0.45 | 0.44 | 8.87  | 651 |
| 151 | 4.5 | 107 | 71 | 40 | 2.02 | 1.99 | 0.45 | 0.44 | 8.90  | 508 |
| 151 | 4.5 | 107 | 71 | 40 | 2.02 | 1.99 | 0.45 | 0.44 | 8.90  | 508 |
| 151 | 4.5 | 107 | 71 | 40 | 2.02 | 1.99 | 0.45 | 0.44 | 8.90  | 508 |
| 151 | 4.5 | 107 | 71 | 40 | 2.02 | 1.99 | 0.45 | 0.44 | 8.90  | 508 |
| 151 | 4.5 | 107 | 71 | 40 | 2.02 | 1.99 | 0.45 | 0.44 | 8.90  | 508 |
| 141 | 4.2 | 100 | 71 | 37 | 1.89 | 1.85 | 0.45 | 0.44 | 8.91  | 461 |
| 101 | 3   | 71  | 71 | 27 | 1.37 | 1.33 | 0.46 | 0.44 | 8.97  | 271 |
| 101 | 3.0 | 71  | 71 | 27 | 1.37 | 1.33 | 0.46 | 0.44 | 8.97  | 271 |
| 121 | 3.6 | 85  | 70 | 32 | 1.63 | 1.59 | 0.45 | 0.44 | 9.02  | 366 |
| 131 | 3.9 | 92  | 70 | 35 | 1.76 | 1.72 | 0.45 | 0.44 | 9.03  | 413 |
| 135 | 4.0 | 95  | 70 | 36 | 1.81 | 1.77 | 0.45 | 0.44 | 9.08  | 429 |
| 171 | 5   | 119 | 70 | 47 | 2.28 | 2.25 | 0.46 | 0.45 | 9.43  | 587 |
| 161 | 4.7 | 111 | 69 | 45 | 2.15 | 2.12 | 0.46 | 0.45 | 9.58  | 540 |
| 155 | 4.5 | 107 | 69 | 44 | 2.07 | 2.04 | 0.46 | 0.45 | 9.77  | 508 |
| 131 | 3.8 | 90  | 69 | 37 | 1.75 | 1.72 | 0.46 | 0.45 | 9.78  | 397 |
| 131 | 3.8 | 90  | 69 | 37 | 1.75 | 1.72 | 0.46 | 0.45 | 9.78  | 397 |
| 131 | 3.8 | 90  | 69 | 37 | 1.75 | 1.72 | 0.46 | 0.45 | 9.78  | 397 |
| 131 | 3.8 | 90  | 69 | 37 | 1.75 | 1.72 | 0.46 | 0.45 | 9.78  | 397 |
| 131 | 3.8 | 90  | 69 | 37 | 1.75 | 1.72 | 0.46 | 0.45 | 9.80  | 397 |
| 191 | 5.5 | 130 | 68 | 55 | 2.54 | 2.51 | 0.46 | 0.46 | 10.05 | 667 |
| 176 | 5   | 119 | 68 | 52 | 2.34 | 2.32 | 0.47 | 0.46 | 10.41 | 587 |

|     |     |     |    |    |      |      |      |      |       |     |
|-----|-----|-----|----|----|------|------|------|------|-------|-----|
| 151 | 4.3 | 102 | 68 | 45 | 2.01 | 1.99 | 0.47 | 0.46 | 10.42 | 477 |
| 141 | 4   | 95  | 68 | 42 | 1.88 | 1.85 | 0.47 | 0.46 | 10.49 | 429 |
| 211 | 6   | 142 | 67 | 63 | 2.79 | 2.78 | 0.47 | 0.46 | 10.52 | 746 |
| 211 | 6   | 142 | 67 | 63 | 2.79 | 2.78 | 0.47 | 0.46 | 10.52 | 746 |
| 141 | 4   | 95  | 67 | 42 | 1.88 | 1.85 | 0.47 | 0.46 | 10.54 | 429 |
| 141 | 4   | 95  | 67 | 42 | 1.88 | 1.85 | 0.47 | 0.46 | 10.54 | 429 |
| 141 | 4.0 | 95  | 67 | 42 | 1.88 | 1.85 | 0.47 | 0.46 | 10.54 | 429 |
| 141 | 4.0 | 95  | 67 | 42 | 1.88 | 1.85 | 0.47 | 0.46 | 10.54 | 429 |
| 121 | 3.4 | 81  | 67 | 36 | 1.61 | 1.59 | 0.47 | 0.47 | 10.73 | 334 |
| 71  | 2   | 47  | 67 | 21 | 0.96 | 0.93 | 0.48 | 0.47 | 10.70 | 112 |
| 71  | 2.0 | 47  | 67 | 21 | 0.96 | 0.93 | 0.48 | 0.47 | 10.70 | 112 |
| 142 | 4   | 95  | 67 | 43 | 1.89 | 1.87 | 0.47 | 0.47 | 10.74 | 429 |
| 171 | 4.8 | 114 | 67 | 52 | 2.27 | 2.25 | 0.47 | 0.47 | 10.87 | 556 |
| 161 | 4.5 | 107 | 67 | 49 | 2.13 | 2.12 | 0.47 | 0.47 | 10.99 | 508 |
| 161 | 4.5 | 107 | 66 | 50 | 2.13 | 2.12 | 0.47 | 0.47 | 11.07 | 508 |
| 161 | 4.5 | 107 | 66 | 50 | 2.13 | 2.12 | 0.47 | 0.47 | 11.07 | 508 |
| 161 | 4.5 | 107 | 66 | 50 | 2.13 | 2.12 | 0.47 | 0.47 | 11.07 | 508 |
| 161 | 4.5 | 107 | 66 | 50 | 2.13 | 2.12 | 0.47 | 0.47 | 11.07 | 508 |
| 161 | 4.5 | 107 | 66 | 50 | 2.13 | 2.12 | 0.47 | 0.47 | 11.07 | 508 |
| 161 | 4.5 | 107 | 66 | 50 | 2.13 | 2.12 | 0.47 | 0.47 | 11.07 | 508 |
| 151 | 4.2 | 100 | 66 | 47 | 2.00 | 1.99 | 0.48 | 0.47 | 11.12 | 461 |
| 168 | 4.7 | 111 | 66 | 52 | 2.23 | 2.21 | 0.47 | 0.47 | 11.12 | 540 |
| 181 | 5   | 119 | 66 | 57 | 2.39 | 2.38 | 0.48 | 0.48 | 11.39 | 587 |
| 211 | 5.8 | 137 | 65 | 68 | 2.78 | 2.78 | 0.48 | 0.48 | 11.67 | 714 |
| 201 | 5.5 | 130 | 65 | 65 | 2.65 | 2.64 | 0.48 | 0.48 | 11.83 | 667 |
| 147 | 4   | 95  | 65 | 48 | 1.94 | 1.93 | 0.49 | 0.48 | 11.96 | 429 |
| 221 | 6   | 142 | 64 | 73 | 2.90 | 2.91 | 0.48 | 0.48 | 12.15 | 746 |

|     |     |     |    |    |      |      |      |      |       |     |
|-----|-----|-----|----|----|------|------|------|------|-------|-----|
| 111 | 3.0 | 71  | 64 | 37 | 1.48 | 1.46 | 0.49 | 0.49 | 12.22 | 271 |
| 111 | 3   | 71  | 64 | 37 | 1.48 | 1.46 | 0.49 | 0.49 | 12.26 | 271 |
| 111 | 3   | 71  | 64 | 37 | 1.48 | 1.46 | 0.49 | 0.49 | 12.26 | 271 |
| 111 | 3   | 71  | 64 | 37 | 1.48 | 1.46 | 0.49 | 0.49 | 12.26 | 271 |
| 111 | 3   | 71  | 64 | 37 | 1.48 | 1.46 | 0.49 | 0.49 | 12.26 | 271 |
| 131 | 3.5 | 83  | 64 | 44 | 1.73 | 1.72 | 0.49 | 0.49 | 12.64 | 350 |
| 131 | 3.5 | 83  | 64 | 44 | 1.73 | 1.72 | 0.49 | 0.49 | 12.64 | 350 |
| 161 | 4.3 | 102 | 63 | 55 | 2.12 | 2.12 | 0.49 | 0.49 | 12.69 | 477 |
| 225 | 6.0 | 142 | 63 | 77 | 2.95 | 2.96 | 0.49 | 0.49 | 12.77 | 746 |
| 256 | 6.8 | 161 | 63 | 88 | 3.34 | 3.37 | 0.49 | 0.50 | 12.92 | 872 |
| 133 | 3.5 | 83  | 63 | 46 | 1.75 | 1.75 | 0.50 | 0.50 | 13.20 | 350 |
| 191 | 5   | 119 | 62 | 67 | 2.50 | 2.51 | 0.50 | 0.50 | 13.34 | 587 |
| 191 | 5   | 119 | 62 | 67 | 2.50 | 2.51 | 0.50 | 0.50 | 13.34 | 587 |
| 191 | 5.0 | 119 | 62 | 67 | 2.50 | 2.51 | 0.50 | 0.50 | 13.44 | 587 |
| 211 | 5.5 | 130 | 62 | 75 | 2.76 | 2.78 | 0.50 | 0.50 | 13.67 | 667 |
| 185 | 4.8 | 114 | 62 | 66 | 2.42 | 2.43 | 0.50 | 0.51 | 13.77 | 556 |
| 121 | 3.1 | 73  | 60 | 45 | 1.59 | 1.59 | 0.51 | 0.51 | 14.36 | 287 |
| 119 | 3.0 | 71  | 60 | 44 | 1.56 | 1.56 | 0.52 | 0.52 | 14.82 | 271 |
| 151 | 3.8 | 90  | 60 | 57 | 1.97 | 1.99 | 0.52 | 0.52 | 14.92 | 397 |
| 181 | 4.5 | 107 | 59 | 69 | 2.35 | 2.38 | 0.52 | 0.53 | 15.40 | 508 |
| 181 | 4.5 | 107 | 59 | 69 | 2.35 | 2.38 | 0.52 | 0.53 | 15.40 | 508 |
| 161 | 4.0 | 95  | 59 | 62 | 2.10 | 2.12 | 0.52 | 0.53 | 15.42 | 429 |
| 161 | 4.0 | 95  | 59 | 62 | 2.10 | 2.12 | 0.52 | 0.53 | 15.42 | 429 |
| 121 | 3   | 71  | 59 | 46 | 1.59 | 1.59 | 0.53 | 0.53 | 15.47 | 271 |
| 121 | 3   | 71  | 59 | 46 | 1.59 | 1.59 | 0.53 | 0.53 | 15.47 | 271 |
| 121 | 3.0 | 71  | 59 | 46 | 1.59 | 1.59 | 0.53 | 0.53 | 15.47 | 271 |
| 206 | 5.1 | 121 | 59 | 79 | 2.67 | 2.71 | 0.52 | 0.53 | 15.58 | 603 |

|     |     |     |    |     |      |      |      |      |       |     |
|-----|-----|-----|----|-----|------|------|------|------|-------|-----|
| 81  | 2.0 | 47  | 59 | 31  | 1.07 | 1.06 | 0.54 | 0.53 | 15.58 | 112 |
| 251 | 6.2 | 147 | 59 | 97  | 3.25 | 3.30 | 0.52 | 0.53 | 15.68 | 777 |
| 151 | 3.7 | 88  | 58 | 59  | 1.97 | 1.99 | 0.53 | 0.54 | 15.88 | 382 |
| 126 | 3.0 | 71  | 57 | 51  | 1.64 | 1.66 | 0.55 | 0.55 | 17.10 | 271 |
| 147 | 3.5 | 83  | 57 | 60  | 1.91 | 1.93 | 0.55 | 0.55 | 17.12 | 350 |
| 126 | 3   | 71  | 56 | 51  | 1.64 | 1.66 | 0.55 | 0.55 | 17.13 | 271 |
| 211 | 5   | 119 | 56 | 86  | 2.72 | 2.78 | 0.54 | 0.56 | 17.24 | 587 |
| 211 | 5   | 119 | 56 | 86  | 2.72 | 2.78 | 0.54 | 0.56 | 17.24 | 587 |
| 206 | 4.9 | 116 | 56 | 84  | 2.66 | 2.71 | 0.54 | 0.55 | 17.21 | 572 |
| 211 | 5.0 | 119 | 56 | 87  | 2.72 | 2.78 | 0.54 | 0.56 | 17.34 | 587 |
| 171 | 4   | 95  | 56 | 71  | 2.21 | 2.25 | 0.55 | 0.56 | 17.86 | 429 |
| 171 | 4   | 95  | 56 | 71  | 2.21 | 2.25 | 0.55 | 0.56 | 17.86 | 429 |
| 171 | 4.0 | 95  | 56 | 71  | 2.21 | 2.25 | 0.55 | 0.56 | 17.86 | 429 |
| 171 | 4.0 | 95  | 56 | 71  | 2.21 | 2.25 | 0.55 | 0.56 | 17.86 | 429 |
| 171 | 4.0 | 95  | 56 | 71  | 2.21 | 2.25 | 0.55 | 0.56 | 17.86 | 429 |
| 131 | 3.0 | 71  | 54 | 56  | 1.70 | 1.72 | 0.57 | 0.57 | 18.73 | 271 |
| 131 | 3.0 | 71  | 54 | 56  | 1.70 | 1.72 | 0.57 | 0.57 | 18.73 | 271 |
| 131 | 3.0 | 71  | 54 | 56  | 1.70 | 1.72 | 0.57 | 0.57 | 18.73 | 271 |
| 131 | 3.0 | 71  | 54 | 56  | 1.70 | 1.72 | 0.57 | 0.57 | 18.73 | 271 |
| 221 | 5   | 119 | 54 | 96  | 2.83 | 2.91 | 0.57 | 0.58 | 19.19 | 587 |
| 135 | 3.0 | 71  | 53 | 60  | 1.74 | 1.77 | 0.58 | 0.59 | 20.03 | 271 |
| 181 | 4   | 95  | 53 | 81  | 2.32 | 2.38 | 0.58 | 0.60 | 20.25 | 429 |
| 162 | 3.6 | 85  | 53 | 72  | 2.08 | 2.13 | 0.58 | 0.59 | 20.14 | 366 |
| 221 | 4.8 | 114 | 52 | 101 | 2.82 | 2.91 | 0.59 | 0.61 | 21.09 | 556 |
| 211 | 4.5 | 107 | 51 | 98  | 2.68 | 2.78 | 0.60 | 0.62 | 21.83 | 508 |
| 141 | 3   | 71  | 50 | 66  | 1.81 | 1.85 | 0.60 | 0.62 | 22.01 | 271 |
| 191 | 4.0 | 95  | 50 | 91  | 2.43 | 2.51 | 0.61 | 0.63 | 22.74 | 429 |

|     |     |     |    |     |      |      |      |      |       |     |
|-----|-----|-----|----|-----|------|------|------|------|-------|-----|
| 121 | 2.5 | 59  | 49 | 58  | 1.55 | 1.59 | 0.62 | 0.64 | 23.32 | 192 |
| 181 | 3.7 | 88  | 49 | 88  | 2.30 | 2.38 | 0.62 | 0.64 | 23.79 | 382 |
| 171 | 3.5 | 83  | 49 | 83  | 2.17 | 2.25 | 0.62 | 0.64 | 23.79 | 350 |
| 176 | 3.5 | 83  | 47 | 88  | 2.23 | 2.32 | 0.64 | 0.66 | 25.20 | 350 |
| 191 | 3.8 | 90  | 47 | 96  | 2.41 | 2.51 | 0.64 | 0.66 | 25.20 | 397 |
| 151 | 3.0 | 71  | 47 | 76  | 1.92 | 1.99 | 0.64 | 0.66 | 25.23 | 271 |
| 151 | 3   | 71  | 47 | 76  | 1.92 | 1.99 | 0.64 | 0.66 | 25.27 | 271 |
| 141 | 2.5 | 59  | 42 | 78  | 1.77 | 1.85 | 0.71 | 0.74 | 31.13 | 192 |
| 291 | 5   | 119 | 41 | 165 | 3.60 | 3.83 | 0.72 | 0.77 | 32.95 | 587 |
| 131 | 2   | 47  | 36 | 80  | 1.62 | 1.72 | 0.81 | 0.86 | 39.98 | 112 |
| 131 | 2.0 | 47  | 36 | 80  | 1.62 | 1.72 | 0.81 | 0.86 | 39.98 | 112 |
| 131 | 2.0 | 47  | 36 | 80  | 1.62 | 1.72 | 0.81 | 0.86 | 39.98 | 112 |

TableS2:

Experimental data

| Exp. Station | Year | Replicati<br>ons | F<br>kg/h<br>a | Yd<br>Mg/ha | Yn<br>kg/ha | NUE<br>% | Ns<br>kg/ha | N2O_N<br>kg/ha | NH3_N<br>kg/ha | N2O_N/Yd<br>kg/Mg | NH3_N/Yd<br>kg/Mg | Ns/Yd<br>kg/Mg | Gross<br>Margin € |
|--------------|------|------------------|----------------|-------------|-------------|----------|-------------|----------------|----------------|-------------------|-------------------|----------------|-------------------|
| Baborówko    | 2003 | 1                | 53             | 4.04        | 82          | 154      | -30         | 0.92           | 0.70           | 0.23              | 0.17              | -7.52          | 491               |
| Baborówko    | 2003 | 1                | 93             | 4.36        | 124         | 133      | -33         | 1.38           | 1.23           | 0.32              | 0.28              | -7.55          | 511               |
| Baborówko    | 2003 | 1                | 133            | 4.47        | 136         | 102      | -6          | 1.83           | 1.76           | 0.41              | 0.39              | -1.39          | 496               |
| Baborówko    | 2003 | 1                | 173            | 4.92        | 155         | 89       | 14          | 2.30           | 2.28           | 0.47              | 0.46              | 2.85           | 538               |
| Baborówko    | 2003 | 1                | 213            | 5.28        | 162         | 76       | 45          | 2.77           | 2.81           | 0.52              | 0.53              | 8.55           | 566               |
| Baborówko    | 2003 | 2                | 53             | 3.96        | 82          | 155      | -31         | 0.91           | 0.70           | 0.23              | 0.18              | -7.73          | 477               |

|           |      |   |     |      |     |     |     |      |      |      |      |       |      |
|-----------|------|---|-----|------|-----|-----|-----|------|------|------|------|-------|------|
| Baborówko | 2003 | 2 | 93  | 4.87 | 137 | 147 | -46 | 1.42 | 1.23 | 0.29 | 0.25 | -9.52 | 597  |
| Baborówko | 2003 | 2 | 133 | 5.33 | 159 | 120 | -30 | 1.89 | 1.76 | 0.35 | 0.33 | -5.60 | 642  |
| Baborówko | 2003 | 2 | 173 | 5.41 | 167 | 97  | 1   | 2.34 | 2.28 | 0.43 | 0.42 | 0.25  | 621  |
| Baborówko | 2003 | 2 | 213 | 5.9  | 177 | 83  | 31  | 2.81 | 2.81 | 0.48 | 0.48 | 5.24  | 671  |
| Baborówko | 2004 | 1 | 53  | 4.36 | 87  | 164 | -35 | 0.94 | 0.70 | 0.22 | 0.16 | -8.13 | 545  |
| Baborówko | 2004 | 1 | 93  | 6.23 | 121 | 130 | -31 | 1.51 | 1.23 | 0.24 | 0.20 | -4.91 | 827  |
| Baborówko | 2004 | 1 | 133 | 8.1  | 169 | 127 | -40 | 2.09 | 1.76 | 0.26 | 0.22 | -4.94 | 1110 |
| Baborówko | 2004 | 1 | 173 | 8.06 | 177 | 102 | -8  | 2.53 | 2.28 | 0.31 | 0.28 | -1.04 | 1069 |
| Baborówko | 2004 | 1 | 213 | 8.12 | 188 | 88  | 19  | 2.97 | 2.81 | 0.37 | 0.35 | 2.39  | 1046 |
| Baborówko | 2004 | 2 | 53  | 3.85 | 77  | 145 | -26 | 0.90 | 0.70 | 0.23 | 0.18 | -6.63 | 459  |
| Baborówko | 2004 | 2 | 93  | 6.03 | 118 | 126 | -27 | 1.50 | 1.23 | 0.25 | 0.20 | -4.51 | 793  |
| Baborówko | 2004 | 2 | 133 | 7.18 | 152 | 114 | -23 | 2.02 | 1.76 | 0.28 | 0.24 | -3.16 | 954  |
| Baborówko | 2004 | 2 | 173 | 7.65 | 168 | 97  | 0   | 2.50 | 2.28 | 0.33 | 0.30 | 0.02  | 1000 |
| Baborówko | 2004 | 2 | 213 | 7.78 | 181 | 85  | 27  | 2.95 | 2.81 | 0.38 | 0.36 | 3.46  | 989  |
| Baborówko | 2005 | 1 | 53  | 2.34 | 45  | 84  | 7   | 0.79 | 0.70 | 0.34 | 0.30 | 2.96  | 203  |
| Baborówko | 2005 | 1 | 93  | 3.13 | 60  | 65  | 30  | 1.29 | 1.23 | 0.41 | 0.39 | 9.68  | 303  |
| Baborówko | 2005 | 1 | 133 | 3.07 | 63  | 47  | 67  | 1.73 | 1.76 | 0.56 | 0.57 | 21.66 | 260  |
| Baborówko | 2005 | 1 | 173 | 3.21 | 80  | 46  | 89  | 2.18 | 2.28 | 0.68 | 0.71 | 27.70 | 249  |
| Baborówko | 2005 | 1 | 213 | 3.41 | 89  | 42  | 119 | 2.63 | 2.81 | 0.77 | 0.82 | 34.82 | 250  |
| Baborówko | 2005 | 2 | 53  | 2.76 | 48  | 90  | 4   | 0.82 | 0.70 | 0.30 | 0.25 | 1.43  | 274  |
| Baborówko | 2005 | 2 | 93  | 3.07 | 62  | 66  | 29  | 1.29 | 1.23 | 0.42 | 0.40 | 9.42  | 293  |
| Baborówko | 2005 | 2 | 133 | 2.73 | 73  | 55  | 57  | 1.70 | 1.76 | 0.62 | 0.64 | 20.76 | 202  |
| Baborówko | 2005 | 2 | 173 | 3.25 | 75  | 43  | 94  | 2.18 | 2.28 | 0.67 | 0.70 | 28.85 | 256  |
| Baborówko | 2005 | 2 | 213 | 3.52 | 97  | 45  | 111 | 2.64 | 2.81 | 0.75 | 0.80 | 31.48 | 269  |
| Baborówko | 2006 | 1 | 53  | 1.57 | 37  | 69  | 15  | 0.74 | 0.70 | 0.47 | 0.45 | 9.48  | 73   |
| Baborówko | 2006 | 1 | 93  | 2.49 | 61  | 65  | 30  | 1.29 | 1.23 | 0.52 | 0.49 | 11.98 | 195  |
| Baborówko | 2006 | 1 | 133 | 2.51 | 82  | 62  | 48  | 1.69 | 1.76 | 0.67 | 0.70 | 18.95 | 165  |

|           |      |   |     |      |     |     |     |      |      |      |      |       |     |
|-----------|------|---|-----|------|-----|-----|-----|------|------|------|------|-------|-----|
| Baborówko | 2006 | 1 | 173 | 2.61 | 83  | 48  | 85  | 2.13 | 2.28 | 0.82 | 0.87 | 32.73 | 148 |
| Baborówko | 2006 | 1 | 213 | 2.42 | 85  | 40  | 122 | 2.56 | 2.81 | 1.06 | 1.16 | 50.57 | 83  |
| Baborówko | 2006 | 2 | 53  | 1.74 | 40  | 76  | 11  | 0.75 | 0.70 | 0.43 | 0.40 | 6.47  | 102 |
| Baborówko | 2006 | 2 | 93  | 2.67 | 84  | 91  | 6   | 1.26 | 1.23 | 0.47 | 0.46 | 2.34  | 225 |
| Baborówko | 2006 | 2 | 133 | 2.76 | 85  | 64  | 45  | 1.70 | 1.76 | 0.62 | 0.64 | 16.19 | 207 |
| Baborówko | 2006 | 2 | 173 | 2.71 | 90  | 52  | 79  | 2.14 | 2.28 | 0.79 | 0.84 | 28.98 | 165 |
| Baborówko | 2006 | 2 | 213 | 2.73 | 84  | 39  | 124 | 2.58 | 2.81 | 0.95 | 1.03 | 45.42 | 135 |
| Baborówko | 2007 | 1 | 53  | 3.23 | 67  | 125 | -15 | 0.86 | 0.70 | 0.27 | 0.22 | -4.63 | 354 |
| Baborówko | 2007 | 1 | 93  | 5.57 | 134 | 144 | -44 | 1.47 | 1.23 | 0.26 | 0.22 | -7.86 | 715 |
| Baborówko | 2007 | 1 | 133 | 5.88 | 140 | 105 | -10 | 1.93 | 1.76 | 0.33 | 0.30 | -1.77 | 735 |
| Baborówko | 2007 | 1 | 173 | 6.22 | 181 | 104 | -12 | 2.39 | 2.28 | 0.38 | 0.37 | -1.98 | 758 |
| Baborówko | 2007 | 1 | 213 | 6.84 | 198 | 93  | 9   | 2.88 | 2.81 | 0.42 | 0.41 | 1.35  | 830 |
| Baborówko | 2007 | 2 | 53  | 3.81 | 82  | 155 | -31 | 0.90 | 0.70 | 0.24 | 0.18 | -8.04 | 452 |
| Baborówko | 2007 | 2 | 93  | 5.27 | 127 | 136 | -36 | 1.45 | 1.23 | 0.28 | 0.23 | -6.87 | 665 |
| Baborówko | 2007 | 2 | 133 | 6.44 | 152 | 114 | -22 | 1.97 | 1.76 | 0.31 | 0.27 | -3.49 | 829 |
| Baborówko | 2007 | 2 | 173 | 6.41 | 159 | 92  | 9   | 2.41 | 2.28 | 0.38 | 0.36 | 1.46  | 790 |
| Baborówko | 2007 | 2 | 213 | 6.33 | 181 | 85  | 27  | 2.84 | 2.81 | 0.45 | 0.44 | 4.23  | 744 |
| Baborówko | 2008 | 1 | 53  | 1.42 | 29  | 54  | 23  | 0.73 | 0.70 | 0.51 | 0.49 | 16.23 | 48  |
| Baborówko | 2008 | 1 | 93  | 1.99 | 38  | 41  | 53  | 1.21 | 1.23 | 0.61 | 0.62 | 26.52 | 110 |
| Baborówko | 2008 | 1 | 133 | 2.52 | 51  | 38  | 79  | 1.69 | 1.76 | 0.67 | 0.70 | 31.38 | 167 |
| Baborówko | 2008 | 1 | 173 | 3.26 | 80  | 46  | 89  | 2.18 | 2.28 | 0.67 | 0.70 | 27.26 | 258 |
| Baborówko | 2008 | 1 | 213 | 3.64 | 92  | 43  | 116 | 2.65 | 2.81 | 0.73 | 0.77 | 31.74 | 289 |
| Baborówko | 2008 | 2 | 53  | 1.34 | 24  | 44  | 28  | 0.72 | 0.70 | 0.54 | 0.52 | 21.09 | 34  |
| Baborówko | 2008 | 2 | 93  | 2.1  | 43  | 46  | 48  | 1.22 | 1.23 | 0.58 | 0.58 | 22.76 | 129 |
| Baborówko | 2008 | 2 | 133 | 2.62 | 69  | 52  | 60  | 1.69 | 1.76 | 0.65 | 0.67 | 23.01 | 184 |
| Baborówko | 2008 | 2 | 173 | 3.07 | 73  | 42  | 96  | 2.17 | 2.28 | 0.71 | 0.74 | 31.29 | 226 |
| Baborówko | 2008 | 2 | 213 | 3.66 | 95  | 45  | 112 | 2.65 | 2.81 | 0.72 | 0.77 | 30.68 | 293 |



|           |      |   |     |      |     |     |     |      |      |      |      |       |     |
|-----------|------|---|-----|------|-----|-----|-----|------|------|------|------|-------|-----|
| Baborówko | 2009 | 1 | 53  | 1.91 | 35  | 66  | 17  | 0.76 | 0.70 | 0.40 | 0.37 | 8.82  | 131 |
| Baborówko | 2009 | 1 | 93  | 2.59 | 51  | 55  | 39  | 1.25 | 1.23 | 0.48 | 0.47 | 15.23 | 212 |
| Baborówko | 2009 | 1 | 133 | 3.18 | 67  | 50  | 62  | 1.73 | 1.76 | 0.54 | 0.55 | 19.65 | 278 |
| Baborówko | 2009 | 1 | 173 | 3.38 | 90  | 52  | 78  | 2.19 | 2.28 | 0.65 | 0.68 | 23.18 | 278 |
| Baborówko | 2009 | 1 | 213 | 3.46 | 90  | 42  | 118 | 2.63 | 2.81 | 0.76 | 0.81 | 34.02 | 259 |
| Baborówko | 2009 | 2 | 53  | 1.81 | 37  | 69  | 15  | 0.76 | 0.70 | 0.42 | 0.39 | 8.24  | 114 |
| Baborówko | 2009 | 2 | 93  | 2.55 | 62  | 66  | 29  | 1.25 | 1.23 | 0.49 | 0.48 | 11.32 | 205 |
| Baborówko | 2009 | 2 | 133 | 3.16 | 79  | 60  | 50  | 1.73 | 1.76 | 0.55 | 0.56 | 15.90 | 275 |
| Baborówko | 2009 | 2 | 173 | 3.14 | 83  | 48  | 86  | 2.17 | 2.28 | 0.69 | 0.73 | 27.29 | 238 |
| Baborówko | 2009 | 2 | 213 | 3.54 | 82  | 39  | 125 | 2.64 | 2.81 | 0.75 | 0.79 | 35.38 | 272 |
| Baborówko | 2010 | 1 | 53  | 2.1  | 34  | 64  | 18  | 0.78 | 0.70 | 0.37 | 0.33 | 8.37  | 163 |
| Baborówko | 2010 | 1 | 93  | 3    | 54  | 58  | 37  | 1.28 | 1.23 | 0.43 | 0.41 | 12.35 | 281 |
| Baborówko | 2010 | 1 | 133 | 3.85 | 69  | 52  | 61  | 1.78 | 1.76 | 0.46 | 0.46 | 15.79 | 392 |
| Baborówko | 2010 | 1 | 173 | 3.73 | 74  | 42  | 95  | 2.21 | 2.28 | 0.59 | 0.61 | 25.51 | 337 |
| Baborówko | 2010 | 1 | 213 | 4.23 | 87  | 41  | 121 | 2.69 | 2.81 | 0.64 | 0.66 | 28.64 | 389 |
| Baborówko | 2010 | 2 | 53  | 2.04 | 36  | 68  | 16  | 0.77 | 0.70 | 0.38 | 0.34 | 7.65  | 153 |
| Baborówko | 2010 | 2 | 93  | 2.93 | 56  | 60  | 35  | 1.28 | 1.23 | 0.44 | 0.42 | 11.78 | 269 |
| Baborówko | 2010 | 2 | 133 | 3.54 | 82  | 61  | 48  | 1.76 | 1.76 | 0.50 | 0.50 | 13.61 | 339 |
| Baborówko | 2010 | 2 | 173 | 3.99 | 88  | 51  | 81  | 2.23 | 2.28 | 0.56 | 0.57 | 20.32 | 381 |
| Baborówko | 2010 | 2 | 213 | 4.32 | 117 | 55  | 90  | 2.70 | 2.81 | 0.63 | 0.65 | 20.89 | 404 |
| Baborówko | 2011 | 1 | 53  | 3.02 | 57  | 108 | -6  | 0.84 | 0.70 | 0.28 | 0.23 | -1.90 | 318 |
| Baborówko | 2011 | 1 | 93  | 4.62 | 109 | 117 | -18 | 1.40 | 1.23 | 0.30 | 0.27 | -3.90 | 555 |
| Baborówko | 2011 | 1 | 133 | 5.5  | 166 | 125 | -37 | 1.90 | 1.76 | 0.35 | 0.32 | -6.65 | 671 |
| Baborówko | 2011 | 1 | 173 | 6.76 | 161 | 93  | 7   | 2.43 | 2.28 | 0.36 | 0.34 | 1.07  | 849 |
| Baborówko | 2011 | 1 | 213 | 7.58 | 197 | 93  | 10  | 2.93 | 2.81 | 0.39 | 0.37 | 1.33  | 955 |
| Baborówko | 2011 | 2 | 53  | 3.58 | 60  | 114 | -9  | 0.88 | 0.70 | 0.25 | 0.20 | -2.47 | 413 |
| Baborówko | 2011 | 2 | 93  | 4.71 | 93  | 99  | -2  | 1.40 | 1.23 | 0.30 | 0.26 | -0.44 | 570 |

|           |      |   |     |      |     |     |     |      |      |      |      |        |      |
|-----------|------|---|-----|------|-----|-----|-----|------|------|------|------|--------|------|
| Baborówko | 2011 | 2 | 133 | 4.74 | 109 | 82  | 20  | 1.85 | 1.76 | 0.39 | 0.37 | 4.25   | 542  |
| Baborówko | 2011 | 2 | 173 | 6.79 | 155 | 89  | 14  | 2.43 | 2.28 | 0.36 | 0.34 | 2.06   | 855  |
| Baborówko | 2011 | 2 | 213 | 7.62 | 197 | 92  | 11  | 2.93 | 2.81 | 0.38 | 0.37 | 1.41   | 962  |
| Baborówko | 2012 | 1 | 53  | 3.44 | 60  | 112 | -8  | 0.87 | 0.70 | 0.25 | 0.20 | -2.32  | 389  |
| Baborówko | 2012 | 1 | 93  | 3.77 | 76  | 82  | 14  | 1.34 | 1.23 | 0.36 | 0.33 | 3.79   | 411  |
| Baborówko | 2012 | 1 | 133 | 4.52 | 93  | 69  | 37  | 1.83 | 1.76 | 0.40 | 0.39 | 8.20   | 505  |
| Baborówko | 2012 | 1 | 173 | 5.13 | 120 | 69  | 49  | 2.32 | 2.28 | 0.45 | 0.44 | 9.49   | 574  |
| Baborówko | 2012 | 1 | 213 | 5.21 | 119 | 56  | 89  | 2.76 | 2.81 | 0.53 | 0.54 | 17.09  | 554  |
| Baborówko | 2012 | 2 | 53  | 2.82 | 51  | 95  | 1   | 0.83 | 0.70 | 0.29 | 0.25 | 0.33   | 285  |
| Baborówko | 2012 | 2 | 93  | 3.75 | 76  | 81  | 15  | 1.38 | 1.23 | 0.37 | 0.33 | 3.96   | 408  |
| Baborówko | 2012 | 2 | 133 | 4.24 | 87  | 66  | 42  | 1.81 | 1.76 | 0.43 | 0.41 | 9.94   | 458  |
| Baborówko | 2012 | 2 | 173 | 4.72 | 112 | 65  | 56  | 2.29 | 2.28 | 0.49 | 0.48 | 11.90  | 505  |
| Baborówko | 2012 | 2 | 213 | 5.4  | 122 | 57  | 86  | 2.77 | 2.81 | 0.51 | 0.52 | 15.90  | 587  |
| Baborówko | 2013 | 1 | 53  | 5.09 | 97  | 183 | -46 | 0.99 | 0.70 | 0.19 | 0.14 | -9.02  | 668  |
| Baborówko | 2013 | 1 | 93  | 6.45 | 150 | 161 | -60 | 1.53 | 1.23 | 0.24 | 0.19 | -9.28  | 864  |
| Baborówko | 2013 | 1 | 133 | 7.27 | 164 | 123 | -35 | 2.03 | 1.76 | 0.28 | 0.24 | -4.81  | 970  |
| Baborówko | 2013 | 1 | 173 | 7.12 | 232 | 134 | -63 | 2.46 | 2.28 | 0.35 | 0.32 | -8.91  | 910  |
| Baborówko | 2013 | 1 | 213 | 7    | 209 | 98  | -1  | 2.89 | 2.81 | 0.41 | 0.40 | -0.19  | 857  |
| Baborówko | 2013 | 2 | 53  | 5.63 | 106 | 198 | -54 | 1.03 | 0.70 | 0.18 | 0.12 | -9.61  | 759  |
| Baborówko | 2013 | 2 | 93  | 6.81 | 156 | 168 | -66 | 1.56 | 1.23 | 0.23 | 0.18 | -9.67  | 925  |
| Baborówko | 2013 | 2 | 133 | 7.49 | 168 | 126 | -39 | 2.05 | 1.76 | 0.27 | 0.23 | -5.22  | 1007 |
| Baborówko | 2013 | 2 | 173 | 7.1  | 227 | 131 | -59 | 2.46 | 2.28 | 0.35 | 0.32 | -8.24  | 907  |
| Baborówko | 2013 | 2 | 213 | 7.11 | 209 | 98  | -2  | 2.90 | 2.81 | 0.41 | 0.40 | -0.28  | 876  |
| Baborówko | 2014 | 1 | 53  | 5.1  | 121 | 227 | -69 | 0.99 | 0.70 | 0.19 | 0.14 | -13.60 | 670  |
| Baborówko | 2014 | 1 | 93  | 6.67 | 158 | 170 | -68 | 1.55 | 1.23 | 0.23 | 0.18 | -10.14 | 901  |
| Baborówko | 2014 | 1 | 133 | 7.81 | 185 | 139 | -56 | 2.07 | 1.76 | 0.27 | 0.22 | -7.13  | 1061 |
| Baborówko | 2014 | 1 | 173 | 8.14 | 193 | 111 | -25 | 2.53 | 2.28 | 0.31 | 0.28 | -3.01  | 907  |

|           |      |   |     |      |     |     |     |      |      |      |      |        |      |
|-----------|------|---|-----|------|-----|-----|-----|------|------|------|------|--------|------|
| Baborówko | 2014 | 1 | 213 | 8.43 | 200 | 94  | 8   | 2.99 | 2.81 | 0.35 | 0.33 | 0.90   | 1099 |
| Baborówko | 2014 | 2 | 53  | 5.16 | 122 | 230 | -71 | 1.00 | 0.70 | 0.19 | 0.14 | -13.72 | 680  |
| Baborówko | 2014 | 2 | 93  | 6.78 | 161 | 172 | -70 | 1.55 | 1.23 | 0.23 | 0.18 | -10.36 | 920  |
| Baborówko | 2014 | 2 | 133 | 7    | 166 | 125 | -36 | 2.01 | 1.76 | 0.29 | 0.25 | -5.21  | 924  |
| Baborówko | 2014 | 2 | 173 | 7.6  | 180 | 104 | -12 | 2.49 | 2.28 | 0.33 | 0.30 | -1.54  | 991  |
| Baborówko | 2014 | 2 | 213 | 8.07 | 191 | 90  | 16  | 2.97 | 2.81 | 0.37 | 0.35 | 2.00   | 1038 |
| Baborówko | 2015 | 1 | 53  | 5.1  | 121 | 227 | -69 | 0.99 | 0.70 | 0.19 | 0.14 | -13.60 | 670  |
| Baborówko | 2015 | 1 | 93  | 6.67 | 158 | 170 | -68 | 1.55 | 1.23 | 0.23 | 0.18 | -10.14 | 901  |
| Baborówko | 2015 | 1 | 133 | 7.81 | 185 | 139 | -56 | 2.07 | 1.76 | 0.27 | 0.22 | -7.13  | 1061 |
| Baborówko | 2015 | 1 | 173 | 8.14 | 193 | 111 | -25 | 2.53 | 2.28 | 0.31 | 0.28 | -3.01  | 1083 |
| Baborówko | 2015 | 1 | 213 | 8.43 | 200 | 94  | 8   | 2.99 | 2.81 | 0.35 | 0.33 | 0.90   | 1099 |
| Baborówko | 2015 | 2 | 53  | 5.1  | 121 | 227 | -69 | 0.99 | 0.70 | 0.19 | 0.14 | -13.60 | 670  |
| Baborówko | 2015 | 2 | 93  | 6.78 | 161 | 172 | -70 | 1.55 | 1.23 | 0.23 | 0.18 | -10.36 | 920  |
| Baborówko | 2015 | 2 | 133 | 7    | 166 | 125 | -36 | 2.01 | 1.76 | 0.29 | 0.25 | -5.21  | 924  |
| Baborówko | 2015 | 2 | 173 | 7.6  | 180 | 104 | -12 | 2.50 | 2.28 | 0.33 | 0.30 | -1.54  | 991  |
| Baborówko | 2015 | 2 | 213 | 8.07 | 191 | 90  | 16  | 2.97 | 2.81 | 0.37 | 0.35 | 2.00   | 1038 |
| Baborówko | 2016 | 1 | 53  | 3.07 | 72  | 135 | -20 | 0.85 | 0.70 | 0.28 | 0.23 | -6.58  | 327  |
| Baborówko | 2016 | 1 | 93  | 4.14 | 110 | 118 | -19 | 1.36 | 1.23 | 0.33 | 0.30 | -4.69  | 474  |
| Baborówko | 2016 | 1 | 133 | 4.36 | 124 | 93  | 5   | 1.82 | 1.76 | 0.42 | 0.40 | 1.23   | 478  |
| Baborówko | 2016 | 1 | 173 | 5.87 | 179 | 103 | -10 | 2.37 | 2.28 | 0.40 | 0.39 | -1.76  | 699  |
| Baborówko | 2016 | 1 | 213 | 6.21 | 189 | 89  | 18  | 2.83 | 2.81 | 0.46 | 0.45 | 2.94   | 723  |
| Baborówko | 2016 | 2 | 53  | 3.2  | 75  | 141 | -23 | 0.86 | 0.70 | 0.27 | 0.22 | -7.30  | 349  |
| Baborówko | 2016 | 2 | 93  | 4.14 | 110 | 118 | -20 | 1.36 | 1.23 | 0.33 | 0.30 | -4.78  | 474  |
| Baborówko | 2016 | 2 | 133 | 4.56 | 130 | 98  | 0   | 1.83 | 1.76 | 0.40 | 0.38 | -0.08  | 512  |
| Baborówko | 2016 | 2 | 173 | 5.85 | 178 | 103 | -10 | 2.37 | 2.28 | 0.41 | 0.39 | -1.64  | 696  |
| Baborówko | 2016 | 2 | 213 | 6.08 | 185 | 87  | 22  | 2.82 | 2.81 | 0.46 | 0.46 | 3.66   | 702  |
| Baborówko | 2017 | 1 | 53  | 5.49 | 98  | 185 | -47 | 1.02 | 0.70 | 0.19 | 0.13 | -8.53  | 736  |

|           |      |   |     |      |     |     |     |      |      |      |      |       |      |
|-----------|------|---|-----|------|-----|-----|-----|------|------|------|------|-------|------|
| Baborówko | 2017 | 1 | 93  | 5.99 | 102 | 110 | -12 | 1.50 | 1.23 | 0.25 | 0.21 | -1.95 | 786  |
| Baborówko | 2017 | 1 | 133 | 7.54 | 141 | 106 | -12 | 2.05 | 1.76 | 0.27 | 0.23 | -1.55 | 1015 |
| Baborówko | 2017 | 1 | 173 | 7.55 | 149 | 86  | 20  | 2.49 | 2.28 | 0.33 | 0.30 | 2.60  | 983  |
| Baborówko | 2017 | 1 | 213 | 7.6  | 155 | 73  | 53  | 2.93 | 2.81 | 0.39 | 0.37 | 6.91  | 867  |
| Baborówko | 2017 | 2 | 53  | 5.41 | 97  | 182 | -45 | 1.02 | 0.70 | 0.19 | 0.13 | -8.34 | 722  |
| Baborówko | 2017 | 2 | 93  | 5.88 | 100 | 108 | -10 | 1.49 | 1.23 | 0.25 | 0.21 | -1.68 | 768  |
| Baborówko | 2017 | 2 | 133 | 7.61 | 143 | 107 | -13 | 2.05 | 1.76 | 0.27 | 0.23 | -1.74 | 1027 |
| Baborówko | 2017 | 2 | 173 | 7.64 | 150 | 87  | 18  | 2.50 | 2.28 | 0.33 | 0.30 | 2.42  | 998  |
| Baborówko | 2017 | 2 | 213 | 7.6  | 154 | 72  | 53  | 2.93 | 2.81 | 0.39 | 0.37 | 6.98  | 958  |
| Baborówko | 2018 | 1 | 53  | 4.36 | 61  | 116 | -10 | 0.94 | 0.70 | 0.22 | 0.16 | -2.27 | 545  |
| Baborówko | 2018 | 1 | 93  | 5.42 | 73  | 79  | 17  | 1.46 | 1.23 | 0.27 | 0.23 | 3.20  | 690  |
| Baborówko | 2018 | 1 | 133 | 5.67 | 86  | 65  | 43  | 1.91 | 1.76 | 0.34 | 0.31 | 7.65  | 699  |
| Baborówko | 2018 | 1 | 173 | 5.74 | 96  | 55  | 73  | 2.36 | 2.28 | 0.41 | 0.40 | 12.67 | 677  |
| Baborówko | 2018 | 1 | 213 | 5.78 | 108 | 51  | 100 | 2.80 | 2.81 | 0.48 | 0.49 | 17.22 | 651  |
| Baborówko | 2018 | 2 | 53  | 4.36 | 61  | 116 | -10 | 0.94 | 0.70 | 0.22 | 0.16 | -2.28 | 545  |
| Baborówko | 2018 | 2 | 93  | 5.13 | 69  | 74  | 21  | 1.44 | 1.23 | 0.28 | 0.24 | 4.15  | 641  |
| Baborówko | 2018 | 2 | 133 | 5.56 | 85  | 63  | 45  | 1.91 | 1.76 | 0.34 | 0.32 | 8.10  | 681  |
| Baborówko | 2018 | 2 | 173 | 5.66 | 95  | 55  | 74  | 2.35 | 2.28 | 0.42 | 0.40 | 13.08 | 664  |
| Baborówko | 2018 | 2 | 213 | 5.78 | 108 | 51  | 100 | 2.80 | 2.81 | 0.48 | 0.49 | 17.22 | 651  |
| Grabów    | 2003 | 1 | 50  | 3.31 | 68  | 136 | -19 | 0.83 | 0.66 | 0.25 | 0.20 | -5.84 | 367  |
| Grabów    | 2003 | 1 | 90  | 3.33 | 82  | 92  | 5   | 1.27 | 1.18 | 0.38 | 0.36 | 1.56  | 337  |
| Grabów    | 2003 | 1 | 130 | 2.76 | 87  | 67  | 40  | 1.67 | 1.71 | 0.61 | 0.62 | 14.49 | 207  |
| Grabów    | 2003 | 1 | 170 | 3.5  | 107 | 63  | 58  | 2.16 | 2.24 | 0.62 | 0.64 | 16.58 | 299  |
| Grabów    | 2003 | 1 | 210 | 3.65 | 108 | 52  | 96  | 2.62 | 2.77 | 0.72 | 0.76 | 26.35 | 291  |
| Grabów    | 2003 | 2 | 50  | 2.61 | 53  | 106 | -4  | 0.78 | 0.66 | 0.30 | 0.25 | -1.72 | 249  |
| Grabów    | 2003 | 2 | 90  | 3.1  | 79  | 87  | 9   | 1.26 | 1.18 | 0.41 | 0.38 | 2.84  | 298  |
| Grabów    | 2003 | 2 | 130 | 3.42 | 101 | 78  | 25  | 1.74 | 1.71 | 0.51 | 0.50 | 7.43  | 319  |

|        |      |   |     |      |     |     |     |      |      |      |      |       |      |
|--------|------|---|-----|------|-----|-----|-----|------|------|------|------|-------|------|
| Grabów | 2003 | 2 | 170 | 2.98 | 94  | 55  | 72  | 2.13 | 2.24 | 0.71 | 0.75 | 24.13 | 211  |
| Grabów | 2003 | 2 | 210 | 2.51 | 77  | 37  | 127 | 2.53 | 2.77 | 1.01 | 1.10 | 50.73 | 98   |
| Grabów | 2004 | 1 | 50  | 5.46 | 89  | 179 | -41 | 0.99 | 0.66 | 0.18 | 0.12 | -7.54 | 731  |
| Grabów | 2004 | 1 | 90  | 7.09 | 136 | 151 | -48 | 1.54 | 1.18 | 0.22 | 0.17 | -6.84 | 972  |
| Grabów | 2004 | 1 | 130 | 8.62 | 186 | 143 | -60 | 2.09 | 1.71 | 0.24 | 0.20 | -6.90 | 1198 |
| Grabów | 2004 | 1 | 170 | 9.32 | 232 | 136 | -66 | 2.58 | 2.24 | 0.28 | 0.24 | -7.13 | 1282 |
| Grabów | 2004 | 1 | 210 | 9.34 | 253 | 121 | -49 | 3.03 | 2.77 | 0.32 | 0.30 | -5.24 | 1249 |
| Grabów | 2004 | 2 | 50  | 6.15 | 95  | 191 | -47 | 1.04 | 0.66 | 0.17 | 0.11 | -7.64 | 847  |
| Grabów | 2004 | 2 | 90  | 6.86 | 125 | 140 | -38 | 1.53 | 1.18 | 0.22 | 0.17 | -5.58 | 933  |
| Grabów | 2004 | 2 | 130 | 8.23 | 173 | 133 | -47 | 2.07 | 1.71 | 0.25 | 0.21 | -5.74 | 1132 |
| Grabów | 2004 | 2 | 170 | 9.66 | 239 | 141 | -74 | 2.61 | 2.24 | 0.27 | 0.23 | -7.70 | 1282 |
| Grabów | 2004 | 2 | 210 | 9.6  | 262 | 125 | -58 | 3.04 | 2.77 | 0.32 | 0.29 | -6.07 | 1296 |
| Grabów | 2005 | 1 | 50  | 3.97 | 55  | 111 | -7  | 0.88 | 0.66 | 0.22 | 0.17 | -1.74 | 479  |
| Grabów | 2005 | 1 | 90  | 5.66 | 93  | 103 | -5  | 1.44 | 1.18 | 0.25 | 0.21 | -0.96 | 731  |
| Grabów | 2005 | 1 | 130 | 5.6  | 111 | 85  | 16  | 1.88 | 1.71 | 0.34 | 0.31 | 2.81  | 687  |
| Grabów | 2005 | 1 | 170 | 6.5  | 151 | 89  | 14  | 2.38 | 2.24 | 0.37 | 0.34 | 2.18  | 806  |
| Grabów | 2005 | 1 | 210 | 5.65 | 166 | 79  | 38  | 2.76 | 2.77 | 0.49 | 0.49 | 6.73  | 629  |
| Grabów | 2005 | 2 | 50  | 3.92 | 59  | 118 | -11 | 0.88 | 0.66 | 0.22 | 0.17 | -2.72 | 470  |
| Grabów | 2005 | 2 | 90  | 5.31 | 94  | 104 | -6  | 1.42 | 1.18 | 0.27 | 0.22 | -1.19 | 671  |
| Grabów | 2005 | 2 | 130 | 6.08 | 115 | 89  | 11  | 1.91 | 1.71 | 0.31 | 0.28 | 1.78  | 769  |
| Grabów | 2005 | 2 | 170 | 6.05 | 160 | 94  | 5   | 2.35 | 2.24 | 0.39 | 0.37 | 0.84  | 729  |
| Grabów | 2005 | 2 | 210 | 5.63 | 170 | 81  | 34  | 2.76 | 2.77 | 0.49 | 0.49 | 6.05  | 625  |
| Grabów | 2006 | 1 | 50  | 2.78 | 50  | 100 | -1  | 0.79 | 0.66 | 0.28 | 0.24 | -0.48 | 278  |
| Grabów | 2006 | 1 | 90  | 3.35 | 79  | 88  | 8   | 1.27 | 1.18 | 0.38 | 0.35 | 2.45  | 340  |
| Grabów | 2006 | 1 | 130 | 3.97 | 94  | 73  | 32  | 1.76 | 1.71 | 0.44 | 0.43 | 8.12  | 412  |
| Grabów | 2006 | 1 | 170 | 4.59 | 126 | 74  | 39  | 2.24 | 2.24 | 0.49 | 0.49 | 8.51  | 483  |
| Grabów | 2006 | 1 | 210 | 4.44 | 141 | 67  | 63  | 2.67 | 2.77 | 0.60 | 0.62 | 14.23 | 424  |

|        |      |   |     |      |     |     |     |      |      |      |      |       |     |
|--------|------|---|-----|------|-----|-----|-----|------|------|------|------|-------|-----|
| Grabów | 2006 | 2 | 50  | 3.11 | 55  | 110 | -6  | 0.82 | 0.66 | 0.26 | 0.21 | -2.03 | 334 |
| Grabów | 2006 | 2 | 90  | 3.11 | 72  | 80  | 15  | 1.26 | 1.18 | 0.41 | 0.38 | 4.95  | 300 |
| Grabów | 2006 | 2 | 130 | 3.26 | 85  | 65  | 42  | 1.71 | 1.71 | 0.52 | 0.53 | 12.80 | 292 |
| Grabów | 2006 | 2 | 170 | 3.1  | 92  | 54  | 74  | 2.14 | 2.24 | 0.69 | 0.72 | 23.79 | 231 |
| Grabów | 2006 | 2 | 210 | 3.21 | 109 | 52  | 95  | 2.58 | 2.77 | 0.80 | 0.86 | 29.74 | 216 |
| Grabów | 2007 | 1 | 50  | 3.76 | 76  | 151 | -27 | 0.86 | 0.66 | 0.23 | 0.17 | -7.24 | 443 |
| Grabów | 2007 | 1 | 90  | 4.45 | 87  | 97  | 0   | 1.35 | 1.18 | 0.30 | 0.27 | -0.01 | 526 |
| Grabów | 2007 | 1 | 130 | 4.91 | 126 | 97  | 1   | 1.83 | 1.71 | 0.37 | 0.35 | 0.14  | 571 |
| Grabów | 2007 | 1 | 170 | 5.58 | 162 | 95  | 3   | 2.31 | 2.24 | 0.41 | 0.40 | 0.60  | 650 |
| Grabów | 2007 | 1 | 210 | 5.32 | 198 | 94  | 7   | 2.74 | 2.77 | 0.52 | 0.52 | 1.24  | 573 |
| Grabów | 2007 | 2 | 50  | 3.67 | 70  | 140 | -22 | 0.86 | 0.66 | 0.23 | 0.18 | -5.88 | 428 |
| Grabów | 2007 | 2 | 90  | 4.29 | 85  | 94  | 3   | 1.34 | 1.18 | 0.31 | 0.28 | 0.64  | 499 |
| Grabów | 2007 | 2 | 130 | 5.02 | 125 | 96  | 2   | 1.83 | 1.71 | 0.36 | 0.34 | 0.34  | 589 |
| Grabów | 2007 | 2 | 170 | 5.1  | 152 | 89  | 14  | 2.28 | 2.24 | 0.45 | 0.44 | 2.68  | 569 |
| Grabów | 2007 | 2 | 210 | 4.92 | 175 | 83  | 30  | 2.71 | 2.77 | 0.55 | 0.56 | 6.05  | 505 |
| Grabów | 2008 | 1 | 50  | 5.35 | 78  | 156 | -30 | 0.98 | 0.66 | 0.18 | 0.12 | -5.52 | 712 |
| Grabów | 2008 | 1 | 90  | 6.64 | 107 | 119 | -19 | 1.51 | 1.18 | 0.23 | 0.18 | -2.93 | 896 |
| Grabów | 2008 | 1 | 130 | 7.3  | 138 | 106 | -12 | 2.00 | 1.71 | 0.27 | 0.23 | -1.62 | 929 |
| Grabów | 2008 | 1 | 170 | 6.99 | 139 | 82  | 26  | 2.42 | 2.24 | 0.35 | 0.32 | 3.73  | 888 |
| Grabów | 2008 | 1 | 210 | 6.12 | 154 | 73  | 50  | 2.79 | 2.77 | 0.46 | 0.45 | 8.20  | 708 |
| Grabów | 2008 | 2 | 50  | 4.39 | 74  | 148 | -25 | 0.91 | 0.66 | 0.21 | 0.15 | -5.77 | 550 |
| Grabów | 2008 | 2 | 90  | 6    | 99  | 110 | -12 | 1.46 | 1.18 | 0.24 | 0.20 | -1.97 | 788 |
| Grabów | 2008 | 2 | 130 | 6.7  | 131 | 101 | -5  | 1.96 | 1.71 | 0.29 | 0.26 | -0.68 | 767 |
| Grabów | 2008 | 2 | 170 | 7.47 | 173 | 102 | -8  | 2.45 | 2.24 | 0.33 | 0.30 | -1.01 | 969 |
| Grabów | 2008 | 2 | 210 | 6.7  | 192 | 91  | 13  | 2.84 | 2.77 | 0.42 | 0.41 | 1.88  | 806 |
| Grabów | 2009 | 1 | 50  | 3.6  | 59  | 119 | -11 | 0.85 | 0.66 | 0.24 | 0.18 | -3.00 | 416 |
| Grabów | 2009 | 1 | 90  | 5.8  | 103 | 114 | -16 | 1.45 | 1.18 | 0.25 | 0.20 | -2.69 | 754 |

|        |      |   |     |      |     |     |     |      |      |      |      |       |     |
|--------|------|---|-----|------|-----|-----|-----|------|------|------|------|-------|-----|
| Grabów | 2009 | 1 | 130 | 5.52 | 104 | 80  | 22  | 1.87 | 1.71 | 0.34 | 0.31 | 3.97  | 674 |
| Grabów | 2009 | 1 | 170 | 6.51 | 141 | 83  | 25  | 2.38 | 2.24 | 0.37 | 0.34 | 3.77  | 807 |
| Grabów | 2009 | 1 | 210 | 6.74 | 196 | 94  | 8   | 2.84 | 2.77 | 0.42 | 0.41 | 1.18  | 813 |
| Grabów | 2009 | 2 | 50  | 3.12 | 52  | 104 | -4  | 0.82 | 0.66 | 0.26 | 0.21 | -1.17 | 335 |
| Grabów | 2009 | 2 | 90  | 5.31 | 87  | 96  | 1   | 1.42 | 1.18 | 0.27 | 0.22 | 0.14  | 671 |
| Grabów | 2009 | 2 | 130 | 5.41 | 99  | 76  | 27  | 1.86 | 1.71 | 0.34 | 0.32 | 4.98  | 655 |
| Grabów | 2009 | 2 | 170 | 6.41 | 140 | 82  | 25  | 2.37 | 2.24 | 0.37 | 0.35 | 3.93  | 790 |
| Grabów | 2009 | 2 | 210 | 6.46 | 168 | 80  | 36  | 2.82 | 2.77 | 0.44 | 0.43 | 5.55  | 766 |
| Grabów | 2010 | 1 | 50  | 3.82 | 63  | 127 | -15 | 0.87 | 0.66 | 0.23 | 0.17 | -3.94 | 454 |
| Grabów | 2010 | 1 | 90  | 5.55 | 110 | 122 | -22 | 1.43 | 1.18 | 0.26 | 0.21 | -4.00 | 712 |
| Grabów | 2010 | 1 | 130 | 6.02 | 122 | 94  | 4   | 1.91 | 1.71 | 0.32 | 0.28 | 0.69  | 758 |
| Grabów | 2010 | 1 | 170 | 6.37 | 128 | 75  | 37  | 2.37 | 2.24 | 0.37 | 0.35 | 5.83  | 784 |
| Grabów | 2010 | 1 | 210 | 6.79 | 173 | 82  | 31  | 2.84 | 2.77 | 0.42 | 0.41 | 4.60  | 822 |
| Grabów | 2010 | 2 | 50  | 3.01 | 54  | 107 | -5  | 0.81 | 0.66 | 0.27 | 0.22 | -1.69 | 317 |
| Grabów | 2010 | 2 | 90  | 5.63 | 104 | 115 | -17 | 1.44 | 1.18 | 0.26 | 0.21 | -2.94 | 725 |
| Grabów | 2010 | 2 | 130 | 5.86 | 127 | 98  | 0   | 1.89 | 1.71 | 0.32 | 0.29 | -0.07 | 731 |
| Grabów | 2010 | 2 | 170 | 6.19 | 129 | 76  | 36  | 2.36 | 2.24 | 0.38 | 0.36 | 5.79  | 753 |
| Grabów | 2010 | 2 | 210 | 5.99 | 172 | 82  | 32  | 2.77 | 2.77 | 0.46 | 0.46 | 5.39  | 686 |
| Grabów | 2011 | 1 | 50  | 4.77 | 76  | 151 | -27 | 0.94 | 0.66 | 0.20 | 0.14 | -5.72 | 614 |
| Grabów | 2011 | 1 | 90  | 6.18 | 112 | 125 | -25 | 1.48 | 1.18 | 0.24 | 0.19 | -4.08 | 818 |
| Grabów | 2011 | 1 | 130 | 5.96 | 121 | 93  | 5   | 1.90 | 1.71 | 0.32 | 0.29 | 0.86  | 748 |
| Grabów | 2011 | 1 | 170 | 6.48 | 137 | 81  | 29  | 2.38 | 2.24 | 0.37 | 0.35 | 4.40  | 802 |
| Grabów | 2011 | 1 | 210 | 6.58 | 160 | 76  | 45  | 2.83 | 2.77 | 0.43 | 0.42 | 6.79  | 786 |
| Grabów | 2011 | 2 | 50  | 4.69 | 74  | 148 | -25 | 0.93 | 0.66 | 0.20 | 0.14 | -5.43 | 584 |
| Grabów | 2011 | 2 | 90  | 5.58 | 106 | 118 | -19 | 1.43 | 1.18 | 0.26 | 0.21 | -3.43 | 717 |
| Grabów | 2011 | 2 | 130 | 6    | 122 | 94  | 4   | 1.90 | 1.71 | 0.32 | 0.29 | 0.70  | 755 |
| Grabów | 2011 | 2 | 170 | 5.03 | 122 | 72  | 43  | 2.28 | 2.24 | 0.45 | 0.45 | 8.53  | 557 |

|        |      |   |     |      |     |     |     |      |      |      |      |        |     |
|--------|------|---|-----|------|-----|-----|-----|------|------|------|------|--------|-----|
| Grabów | 2011 | 2 | 210 | 3.9  | 106 | 51  | 98  | 2.63 | 2.77 | 0.67 | 0.71 | 25.24  | 333 |
| Grabów | 2012 | 1 | 50  | 3.3  | 80  | 159 | -31 | 0.83 | 0.66 | 0.25 | 0.20 | -9.44  | 366 |
| Grabów | 2012 | 1 | 90  | 3.77 | 101 | 113 | -14 | 1.30 | 1.18 | 0.34 | 0.31 | -3.69  | 411 |
| Grabów | 2012 | 1 | 130 | 4.12 | 112 | 87  | 14  | 1.77 | 1.71 | 0.43 | 0.42 | 3.39   | 437 |
| Grabów | 2012 | 1 | 170 | 3.66 | 110 | 65  | 55  | 2.18 | 2.24 | 0.60 | 0.61 | 15.11  | 326 |
| Grabów | 2012 | 1 | 210 | 3.94 | 125 | 60  | 79  | 2.64 | 2.77 | 0.67 | 0.70 | 20.12  | 340 |
| Grabów | 2012 | 2 | 50  | 3.34 | 77  | 155 | -29 | 0.83 | 0.66 | 0.25 | 0.20 | -8.66  | 372 |
| Grabów | 2012 | 2 | 90  | 3.35 | 92  | 102 | -4  | 1.27 | 1.18 | 0.38 | 0.35 | -1.31  | 340 |
| Grabów | 2012 | 2 | 130 | 3.63 | 105 | 81  | 22  | 1.73 | 1.71 | 0.48 | 0.47 | 5.99   | 354 |
| Grabów | 2012 | 2 | 170 | 3.48 | 107 | 63  | 58  | 2.16 | 2.24 | 0.62 | 0.64 | 16.74  | 295 |
| Grabów | 2012 | 2 | 210 | 3.02 | 106 | 50  | 99  | 2.57 | 2.77 | 0.85 | 0.92 | 32.78  | 184 |
| Grabów | 2013 | 1 | 50  | 5.4  | 119 | 239 | -71 | 0.98 | 0.66 | 0.18 | 0.12 | -13.12 | 721 |
| Grabów | 2013 | 1 | 90  | 6.15 | 139 | 154 | -52 | 1.48 | 1.18 | 0.24 | 0.19 | -8.39  | 813 |
| Grabów | 2013 | 1 | 130 | 6.58 | 158 | 121 | -31 | 1.95 | 1.71 | 0.30 | 0.26 | -4.78  | 853 |
| Grabów | 2013 | 1 | 170 | 6.5  | 163 | 96  | 2   | 2.38 | 2.24 | 0.37 | 0.34 | 0.32   | 806 |
| Grabów | 2013 | 1 | 210 | 6.67 | 201 | 96  | 3   | 2.83 | 2.77 | 0.42 | 0.41 | 0.47   | 801 |
| Grabów | 2013 | 2 | 50  | 5.38 | 117 | 235 | -69 | 0.98 | 0.66 | 0.18 | 0.12 | -12.79 | 717 |
| Grabów | 2013 | 2 | 90  | 6.78 | 151 | 168 | -64 | 1.52 | 1.18 | 0.22 | 0.17 | -9.43  | 920 |
| Grabów | 2013 | 2 | 130 | 6.59 | 168 | 130 | -42 | 1.94 | 1.71 | 0.29 | 0.26 | -6.38  | 855 |
| Grabów | 2013 | 2 | 170 | 6.84 | 179 | 105 | -14 | 2.41 | 2.24 | 0.35 | 0.33 | -2.02  | 863 |
| Grabów | 2013 | 2 | 210 | 7.42 | 218 | 104 | -14 | 2.89 | 2.77 | 0.39 | 0.37 | -1.82  | 928 |
| Grabów | 2014 | 1 | 50  | 4.17 | 99  | 198 | -51 | 0.89 | 0.66 | 0.21 | 0.16 | -12.11 | 513 |
| Grabów | 2014 | 1 | 90  | 5.49 | 130 | 145 | -43 | 1.43 | 1.18 | 0.26 | 0.22 | -7.79  | 702 |
| Grabów | 2014 | 1 | 130 | 6.01 | 143 | 110 | -16 | 1.91 | 1.71 | 0.32 | 0.28 | -2.70  | 757 |
| Grabów | 2014 | 1 | 170 | 6.51 | 154 | 91  | 11  | 2.38 | 2.24 | 0.37 | 0.34 | 1.70   | 807 |
| Grabów | 2014 | 1 | 210 | 6.51 | 154 | 73  | 50  | 2.82 | 2.77 | 0.43 | 0.43 | 7.70   | 774 |
| Grabów | 2014 | 2 | 50  | 4.23 | 100 | 201 | -52 | 0.90 | 0.66 | 0.21 | 0.16 | -12.26 | 523 |



|        |      |   |     |      |     |     |     |      |      |      |      |        |      |
|--------|------|---|-----|------|-----|-----|-----|------|------|------|------|--------|------|
| Grabów | 2014 | 2 | 90  | 5.64 | 134 | 149 | -46 | 1.44 | 1.18 | 0.26 | 0.21 | -8.24  | 727  |
| Grabów | 2014 | 2 | 130 | 6.38 | 151 | 116 | -25 | 1.93 | 1.71 | 0.30 | 0.27 | -3.92  | 819  |
| Grabów | 2014 | 2 | 170 | 7.67 | 182 | 107 | -16 | 2.47 | 2.24 | 0.32 | 0.29 | -2.15  | 1003 |
| Grabów | 2014 | 2 | 210 | 6.63 | 157 | 75  | 47  | 2.83 | 2.77 | 0.43 | 0.42 | 7.12   | 794  |
| Grabów | 2015 | 1 | 50  | 4.31 | 102 | 205 | -54 | 0.90 | 0.66 | 0.21 | 0.15 | -12.49 | 536  |
| Grabów | 2015 | 1 | 90  | 5.63 | 133 | 148 | -46 | 1.44 | 1.18 | 0.26 | 0.21 | -8.21  | 725  |
| Grabów | 2015 | 1 | 130 | 6.10 | 145 | 111 | -18 | 1.94 | 1.71 | 0.32 | 0.28 | -2.99  | 772  |
| Grabów | 2015 | 1 | 170 | 5.53 | 131 | 77  | 34  | 2.31 | 2.24 | 0.42 | 0.40 | 6.19   | 642  |
| Grabów | 2015 | 1 | 210 | 7.26 | 172 | 82  | 32  | 2.88 | 2.77 | 0.40 | 0.38 | 4.43   | 901  |
| Grabów | 2015 | 2 | 50  | 4.96 | 117 | 235 | -69 | 0.95 | 0.66 | 0.19 | 0.13 | -13.95 | 646  |
| Grabów | 2015 | 2 | 90  | 6.17 | 146 | 163 | -59 | 1.48 | 1.18 | 0.24 | 0.19 | -9.56  | 866  |
| Grabów | 2015 | 2 | 130 | 6.13 | 145 | 112 | -19 | 1.91 | 1.71 | 0.31 | 0.28 | -3.08  | 777  |
| Grabów | 2015 | 2 | 170 | 6.92 | 164 | 97  | 1   | 2.41 | 2.24 | 0.35 | 0.32 | 0.18   | 876  |
| Grabów | 2015 | 2 | 210 | 6.16 | 146 | 70  | 58  | 2.80 | 2.77 | 0.45 | 0.45 | 9.45   | 715  |
| Grabów | 2016 | 1 | 50  | 5.95 | 104 | 209 | -56 | 1.02 | 0.66 | 0.17 | 0.11 | -9.46  | 814  |
| Grabów | 2016 | 1 | 90  | 6.25 | 118 | 131 | -30 | 1.48 | 1.18 | 0.24 | 0.19 | -4.86  | 830  |
| Grabów | 2016 | 1 | 130 | 7.22 | 157 | 121 | -30 | 1.99 | 1.71 | 0.28 | 0.24 | -4.22  | 961  |
| Grabów | 2016 | 1 | 170 | 8.30 | 179 | 105 | -14 | 2.51 | 2.24 | 0.30 | 0.27 | -1.69  | 1110 |
| Grabów | 2016 | 1 | 210 | 9.11 | 244 | 116 | -40 | 3.01 | 2.77 | 0.33 | 0.30 | -4.40  | 1214 |
| Grabów | 2016 | 2 | 50  | 5.15 | 90  | 181 | -42 | 0.96 | 0.66 | 0.19 | 0.13 | -8.19  | 678  |
| Grabów | 2016 | 2 | 90  | 6.19 | 116 | 129 | -29 | 1.48 | 1.18 | 0.24 | 0.19 | -4.70  | 820  |
| Grabów | 2016 | 2 | 130 | 7.44 | 161 | 124 | -35 | 2.01 | 1.71 | 0.27 | 0.23 | -4.75  | 998  |
| Grabów | 2016 | 2 | 170 | 8.23 | 178 | 105 | -12 | 2.51 | 2.24 | 0.31 | 0.27 | -1.52  | 1098 |
| Grabów | 2016 | 2 | 210 | 8.51 | 228 | 109 | -24 | 2.97 | 2.77 | 0.35 | 0.33 | -2.80  | 1112 |
| Grabów | 2017 | 1 | 50  | 4.31 | 93  | 187 | -45 | 0.90 | 0.66 | 0.21 | 0.15 | -10.42 | 536  |
| Grabów | 2017 | 1 | 90  | 5.35 | 126 | 140 | -39 | 1.42 | 1.18 | 0.27 | 0.22 | -7.24  | 678  |
| Grabów | 2017 | 1 | 130 | 5.45 | 139 | 107 | -13 | 1.87 | 1.71 | 0.34 | 0.31 | -2.37  | 662  |

|        |      |   |     |       |     |     |      |      |      |      |      |        |      |
|--------|------|---|-----|-------|-----|-----|------|------|------|------|------|--------|------|
| Grabów | 2017 | 1 | 170 | 4.96  | 137 | 81  | 29   | 2.27 | 2.24 | 0.46 | 0.45 | 5.76   | 545  |
| Grabów | 2017 | 1 | 210 | 4.51  | 142 | 68  | 63   | 2.68 | 2.77 | 0.59 | 0.61 | 13.91  | 436  |
| Grabów | 2017 | 2 | 50  | 4.54  | 98  | 197 | -50  | 0.92 | 0.66 | 0.20 | 0.14 | -11.04 | 575  |
| Grabów | 2017 | 2 | 90  | 5.26  | 124 | 138 | -37  | 1.41 | 1.18 | 0.27 | 0.23 | -6.99  | 663  |
| Grabów | 2017 | 2 | 130 | 5.28  | 135 | 104 | -9   | 1.85 | 1.71 | 0.35 | 0.32 | -1.64  | 633  |
| Grabów | 2017 | 2 | 170 | 5.07  | 140 | 82  | 26   | 2.28 | 2.24 | 0.45 | 0.44 | 5.03   | 564  |
| Grabów | 2017 | 2 | 210 | 4.54  | 143 | 68  | 62   | 2.68 | 2.77 | 0.59 | 0.61 | 13.60  | 441  |
| Grabów | 2018 | 1 | 50  | 6.88  | 149 | 299 | -101 | 1.09 | 0.66 | 0.16 | 0.10 | -14.69 | 971  |
| Grabów | 2018 | 1 | 90  | 8.84  | 204 | 227 | -117 | 1.67 | 1.18 | 0.19 | 0.13 | -13.26 | 1268 |
| Grabów | 2018 | 1 | 130 | 9.68  | 235 | 181 | -109 | 2.17 | 1.71 | 0.22 | 0.18 | -11.30 | 1377 |
| Grabów | 2018 | 1 | 170 | 10.71 | 277 | 163 | -112 | 2.68 | 2.24 | 0.25 | 0.21 | -10.49 | 1517 |
| Grabów | 2018 | 1 | 210 | 10.45 | 283 | 135 | -79  | 3.11 | 2.77 | 0.30 | 0.26 | -7.60  | 1440 |
| Grabów | 2018 | 2 | 50  | 7.81  | 170 | 340 | -122 | 1.02 | 0.66 | 0.13 | 0.08 | -15.56 | 1128 |
| Grabów | 2018 | 2 | 90  | 9.20  | 213 | 237 | -126 | 1.70 | 1.18 | 0.18 | 0.13 | -13.68 | 1329 |
| Grabów | 2018 | 2 | 130 | 9.61  | 234 | 180 | -108 | 2.17 | 1.71 | 0.23 | 0.18 | -11.21 | 1365 |
| Grabów | 2018 | 2 | 170 | 9.85  | 256 | 150 | -91  | 2.62 | 2.24 | 0.27 | 0.23 | -9.18  | 1372 |
| Grabów | 2018 | 2 | 210 | 10.44 | 283 | 135 | -79  | 3.11 | 2.77 | 0.30 | 0.26 | -7.58  | 1438 |

Table S3: Characteristic of soil chemical properties in the experimental sites

| Experimental station | pH <sub>KCl</sub> | K                            | P           | Mg        |
|----------------------|-------------------|------------------------------|-------------|-----------|
|                      |                   | mg 100 kg <sup>-1</sup> soil |             |           |
| Grabów               | 6.5–6.6           | 83.0–90.5                    | 86.3–94.6   | 36.7–39.7 |
| Baborówko            | 6.6–6.7           | 118.0–125.0                  | 138.0–139.0 | 53.2–56.6 |

Table S4: Cultivation treatments performed in experimental fields

|                     |                                                                                                                                                                                                  |
|---------------------|--------------------------------------------------------------------------------------------------------------------------------------------------------------------------------------------------|
| End of July         | Manual application of P, K, Mg, Ca, S fertilizers (simple superphosphate, triple superphosphate, potassium sulphate, potassium chloride, dolomite flour, magnesium sulphate, calcium oxide lime) |
|                     | Cultivation of the field with a disc harrow                                                                                                                                                      |
| Middle of September | Pre-sowing plowing to a depth of 25-30 cm with a reversible plow                                                                                                                                 |
|                     | Cultivation of the field with an active cultivation set                                                                                                                                          |
|                     | Sowing of winter wheat                                                                                                                                                                           |
| End of October      | Spraying with the herbicide                                                                                                                                                                      |
| Beginning of April  | Superficial application of the first dose of 40 kg N·ha <sup>-1</sup> in the form of ammonium nitrate after the beginning of spring vegetation                                                   |
| Middle of April     | Superficial application of the second dose of 40 kg N·ha <sup>-1</sup> 14 days after the first dose                                                                                              |
|                     | Spraying with the herbicide                                                                                                                                                                      |
| End of April        |                                                                                                                                                                                                  |

|                   |                                                                                                                                     |
|-------------------|-------------------------------------------------------------------------------------------------------------------------------------|
| Beginning of May  | Superficial application of the third dose of 40 kg N·ha <sup>-1</sup> in the form of ammonium nitrate 14 days after the second dose |
| Middle of May     | Superficial application of the fourth dose of 40 kg N·ha <sup>-1</sup> in the form of ammonium nitrate 14 days after the third dose |
| Middle of May     | Spraying with the herbicide                                                                                                         |
| Beginning of June | Superficial application of the fifth dose of 40 kg N·ha <sup>-1</sup> in the form of ammonium nitrate 14 days after the fourth dose |
| End of July       | Threshing with a plot harvester                                                                                                     |

Figure S1: Precipitation

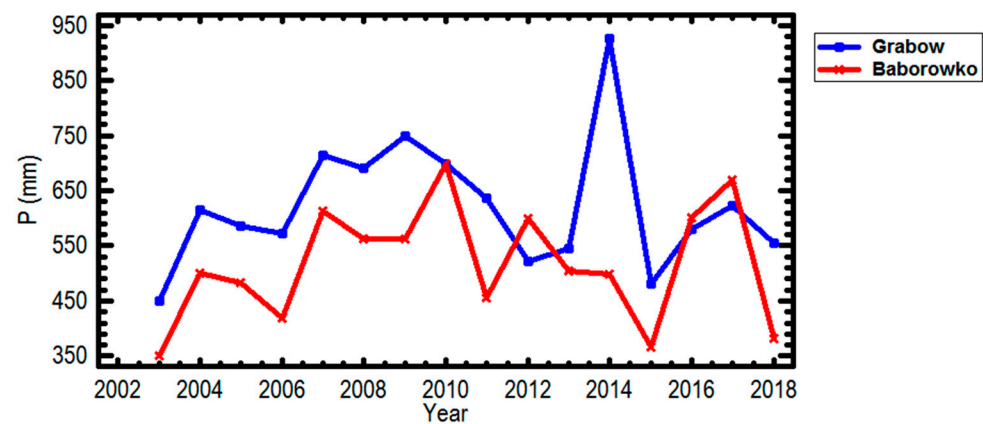

Figure S2: SPI

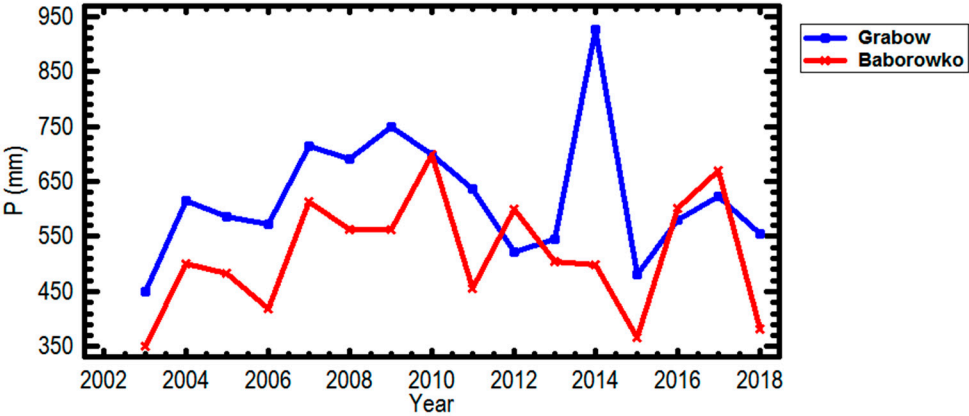

Figure S3: Temperature

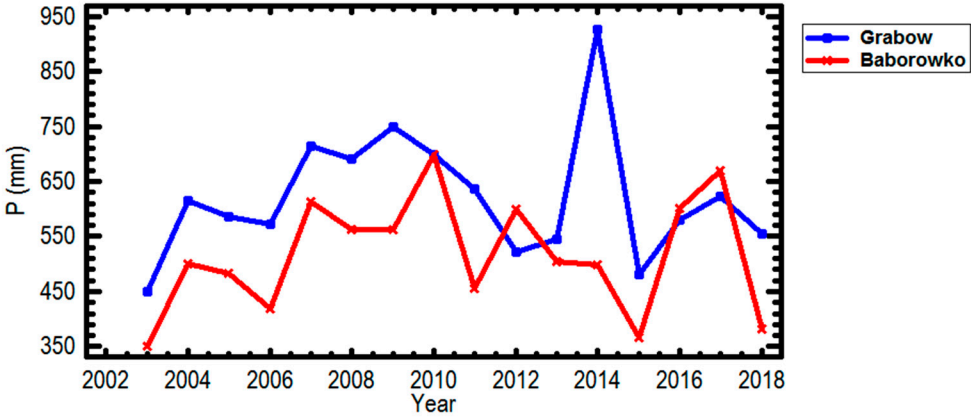

Supplement: s1 [file s1]
